# Supplementary material for: Bi-directional geometric constraints in the construction of giant dual-rim nanorings
Source: Royal Society of Chemistry journal article supplement (doi:10.1039/d3dt00897e), 2023-01-01
Supplement: d3dt00897e1.pdf [file d3dt00897e1.pdf]

# Bi-directional geometric constraints in the construction of giant dual-rim nanorings

Wanying Zhong,<sup>a</sup> Zhantao Wang,<sup>a</sup> Wei-Dong Yu,<sup>c</sup> Ning Wang,<sup>a</sup> Fan Fu,<sup>a</sup> Jun Wang,<sup>a</sup> He Zhao,<sup>b</sup> Die Liu,<sup>b</sup> Zhilong Jiang<sup>\*a</sup>, Pingshan Wang<sup>\*a,b</sup>, Mingzhao Chen<sup>\*a</sup>

## Table of Contents

|                                                                                                 |    |
|-------------------------------------------------------------------------------------------------|----|
| 1. General Procedures .....                                                                     | 2  |
| 2. Synthesis of the ligand 1 and macrocycles 2 .....                                            | 3  |
| 3. Synthesis of the ligand 3 and polymer 4.....                                                 | 8  |
| 4. Synthesis of the ligand LA and supramolecular macrocycles SA .....                           | 10 |
| 5. Synthesis of the ligand LB and supramolecular macrocycles SB.....                            | 16 |
| 6. <sup>1</sup> H NMR, <sup>13</sup> C NMR, COSY and NOESY NMR spectra of other compounds ..... | 20 |
| 7. ESI-MS spectrum of ligands and other compounds .....                                         | 31 |
| 8. The self-assembly process of ligands LA and LB.....                                          | 36 |
| 9. Reference .....                                                                              | 44 |

## 1. General Procedures

All starting materials were purchased from Aldrich, Alfa Aesar and used without further purification. Compounds **S2/S7** ((4-(5,5"-dimethyl-[2,2':6',2"-terpyridin]-4'-yl)phenyl)boronic acid, 4'-(2-(hexyloxy)-4-(4,4,5,5-tetramethyl-1,3,2-dioxaborolan-2-yl)phenyl)-2,2':6',2"-terpyridine) and **5** (2,7-dibromo-9-(3,5-dibromophenyl)-9H-carbazole) were synthesized according to the reported methods[1, 2]. Column chromatography was conducted by using basic Al<sub>2</sub>O<sub>3</sub> (sinopharm chemical reagents co., Ltd, 200-300 mesh) or SiO<sub>2</sub> (Qingdao Haiyang Chemical co., Ltd, 200-300 mesh). The <sup>1</sup>H NMR and <sup>13</sup>C NMR spectra were recorded on a Bruker Avance 400-MHz and 500-MHz NMR spectrometer in CDCl<sub>3</sub>, and CD<sub>3</sub>CN with TMS as the inner standard. Transmission Electron Microscopy (TEM) was obtained on JEOL 2010. Electro-spray ionization (ESI) mass spectra were recorded with a Bruker Q-TOF Qualification Standard Kit., using solutions of 0.1 mg sample in 10 mL of CHCl<sub>3</sub>/ MeCN (1:3, v/v) for ligands or 1 mg in 5 mL of MeCN or MeCN/MeOH (3:1, v/v) for complexes. Energy minimization of the macrocycles was conducted with the Materials Studio version 6.1 program, using the Anneal and Geometry Optimization tasks in the Forcite module (Accelrys Software, Inc.). The counterions were omitted. SCXRD analysis was performed on a Bruker APEX3 diffractometer. The structure was solved with the ShelXT structure solution program using intrinsic phasing and refined with the ShelXL refinement package using least squares minimization. The Solvent Mask routine of the OLEX2 software was implemented to remove the contributions of DMF solvent and dichloromethane solvent to observed structure factors.

**ESI.** ESI mass spectrometry and traveling wave ion mobility (TWIM) experiments were conducted on a Waters Synapt HDMS G2 instrument with a LockSpray ESI source, using the following parameters: ESI capillary voltage, 1.3-3.0 kV; sample cone voltage, 20-25 V; extraction cone voltage, 1.1-3 V; desolvation gas flow, 800 L/h (N<sub>2</sub>); trap collision energy (CE), 4 V; transfer CE, 0 V; trap gas flow, 2.0 mL/min (Ar); source temperature, 30 °C; and desolvation temperature, 30 °C. All samples were dissolved in CH<sub>3</sub>CN or CH<sub>3</sub>CN/CH<sub>3</sub>NO<sub>2</sub> (1:1, v/v) and then infused into the -100, KD Scientific). Data were collected and analyzed by using MassLynx 4.1 and DriftScope 2.4 (Waters).

**Transmission Electron Microscopy (TEM).** The sample was dissolved in CH<sub>3</sub>CN at a concentration of ~10<sup>-7</sup> M. The solutions were dropped cast on to a carbon-coated Cu grid (300-400 mesh) and extra solution was absorbed by filter paper to avoid aggregation. The TEM images of the drop cast samples

were taken with a JEOL 2010 Transmission Electron Microscope. Scanning tunneling microscopy (STEM), and STEM mapping analysis was conducted from Titan G2 60-300 (FEI, U.S.) at an acceleration voltage of 300 kV.

## 2. Synthesis of the ligand 1 and macrocycles 2

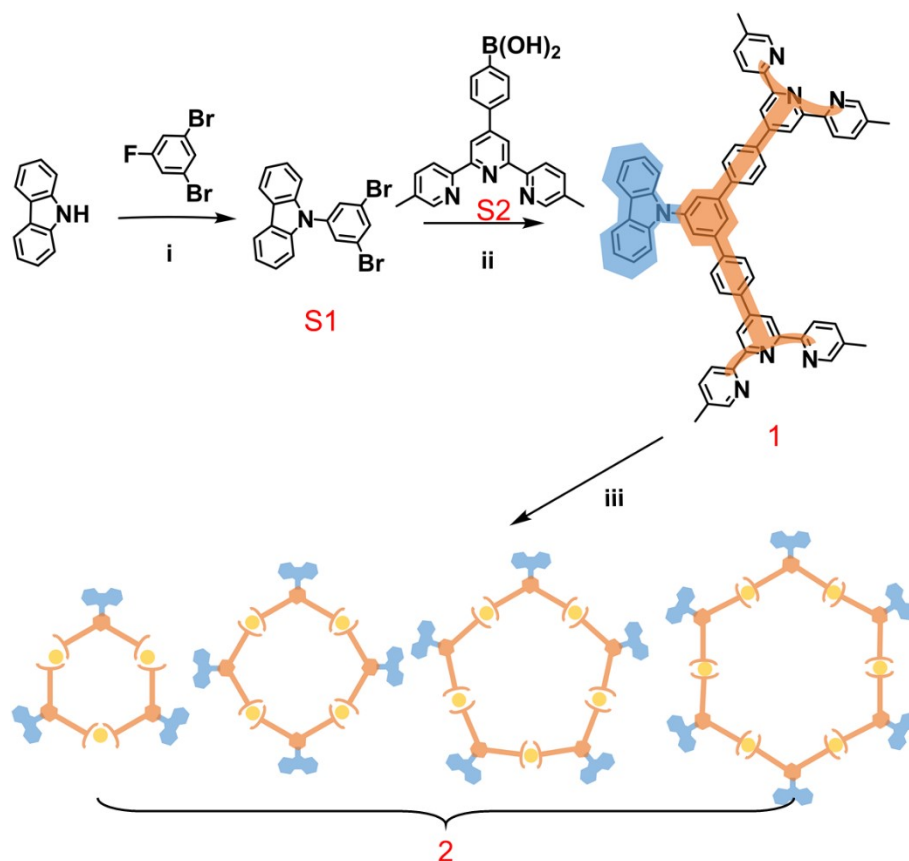

**Scheme S1.** Ligand **1** assembled with Zn<sup>2+</sup> to form a mixture of trimer, tetramer, pentamer, and hexamer macrocycles (**2**). Reagents and conditions: (i) Cs<sub>2</sub>CO<sub>3</sub>, DMF, N<sub>2</sub>, 24h, reflux; (ii) NaOH, Pd(PPh<sub>3</sub>)<sub>4</sub>, H<sub>2</sub>O, THF, N<sub>2</sub>, 48h, reflux; (iii) 1 equiv Zn(NTf<sub>2</sub>)<sub>2</sub>, CHCl<sub>3</sub>/MeOH (2:1), 12h, reflux.

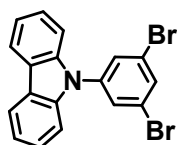

**Compound S1:** Carbazole (1.5 g, 8.97 mmol), 1,3-Dibromo-5-fluorobenzene (9.2 g, 35.88 mmol) was added to a 100 mL flask, then N,N-Dimethylformamide (40 mL) and Cs<sub>2</sub>CO<sub>3</sub> (11.7 g, 35.88 mmol) was added. The mixture was stirred at 150°C under nitrogen for 24 h. After cooled to ambient temperature, the solvent was evaporated in vacuo followed by washed with CH<sub>3</sub>OH, and filtered to

pure the product, as light gray solid: 2.5 g, 69.5%.  $^1\text{H NMR}$  (400 MHz,  $\text{CDCl}_3$ )  $\delta$  8.15-8.10 (m, 2H,  $\text{H}^i$ ), 7.79-7.75 (m, 1H,  $\text{H}^p$ ), 7.72-7.69 (m, 2H,  $\text{H}^n$ ), 7.47-7.39 (m, 4H,  $\text{H}^q, \text{H}^g$ ), 7.35-7.29 (m, 2H,  $\text{H}^m$ ); ESI-MS (401.10 calcd. For  $\text{C}_{18}\text{H}_{11}\text{Br}_2\text{N}$ ):  $m/z$  402.9476  $[\text{M} + \text{H}^+]^+$  (calcd  $m/z$ : 402.9415).

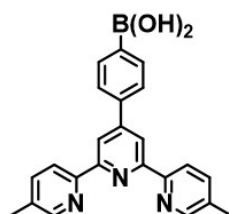

**Compound S2:** 4-Formylphenylboronic acid (5 g, 33.91 mmol), 1-(5-Methylpyridin-2-yl)ethanone (11 g, 81.38 mmol) were added to a 500 mL flask, then  $\text{CH}_3\text{CH}_2\text{OH}$  (90 mL) and NaOH (4 g, 135.65 mmol) was added. The mixture was stirred at room temperature for 12 h. Then  $\text{NH}_3 \cdot \text{H}_2\text{O}$  (120 mL) was added to the mixture. The mixture was stirred at  $80^\circ\text{C}$  for 24 h. After cooled to  $4^\circ\text{C}$ , the solid was collected by filtration and was washed with isopropanol to give the product as a white solid: 6.4 g, 49%.  $^1\text{H NMR}$  (400 MHz, DMSO)  $\delta$  8.74-8.68 (d,  $J = 24$  Hz, 2H,  $\text{H}^{3',5'}$ ), 8.66-8.61 (dd,  $J = 12, 8$  Hz, 2H,  $\text{H}^{3',3''}$ ), 8.60-8.54 (dd,  $J = 8, 16$  Hz, 2H,  $\text{H}^{6,6''}$ ), 8.05 (dd,  $J = 28, 32$  Hz, 2H,  $\text{H}^k$ ), 7.87-7.80 (m, 2H,  $\text{H}^{4,4''}$ ), 7.72 (dd,  $J = 60, 32$  Hz, 2H,  $\text{H}^i$ ), 2.44-2.36 (d,  $J = 32$  Hz, 6H,  $\text{H}^{\text{Me-5},5''}$ );  $^{13}\text{C NMR}$  (101 MHz,  $\text{CDCl}_3$ )  $\delta$  141.42, 138.74, 134.32, 129.18, 124.43, 124.21, 121.95, 121.66, 120.35, 112.81; ESI-MS (381.24 calcd. For  $\text{C}_{23}\text{H}_{20}\text{BN}_3\text{O}_2$ ):  $m/z$  381.1687  $[\text{M} + \text{H}^+]^+$  (calcd  $m/z$ : 381.1685).

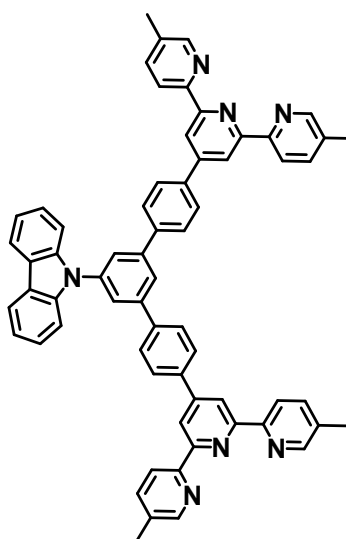

**Compound 1:** Compound S1 (0.3 g, 0.75 mmol), Compound S2 (0.68 g, 1.80 mmol) were added to a 100 mL flask, then THF (30 mL) and NaOH (0.18 g, 4.49 mmol) in 4.5 mL of water was added. The  $\text{Pd}(\text{PPh}_3)_4$  (0.10 g, 0.09 mmol) as the catalyst was added and the system was degassed using  $\text{N}_2$ . The mixture was stirred at  $85^\circ\text{C}$  under nitrogen for 48h. After cooled to ambient temperature, the solvent was evaporated in vacuo followed by washed with  $\text{CH}_3\text{OH}$ . After Filtered to obtain solid, and the solid was recrystallized with  $\text{CH}_2\text{Cl}_2$  and  $\text{CH}_3\text{OH}$  to pure the product, as white solid: 0.856 g, 61%.  $^1\text{H NMR}$  (400 MHz,  $\text{CDCl}_3$ )  $\delta$  8.75 (s, 4H,  $\text{H}^{3',5'}$ ), 8.59-8.55 (m, 8H,  $\text{H}^{3',3''}$ ,  $\text{H}^{6,6''}$ ), 8.22-8.18 (d,  $J = 16$  Hz, 2H,  $\text{H}^i$ ), 8.08-8.05 (m, 5H,  $\text{H}^j, \text{H}^p$ ), 7.91-7.87 (m, 6H,  $\text{H}^n, \text{H}^k$ ), 7.71-7.67 (m, 4H,  $\text{tpy-H}^{4,4'}$ ), 7.61-7.58 (d,  $J = 12$  Hz, 2H,  $\text{H}^g$ ), 7.50-7.46 (t, 2H,  $\text{H}^q$ ), 7.36-7.31 (t, 2H,  $\text{H}^m$ ), 2.44 (s, 13H,  $\text{tpy-H}^{\text{Me}}$ ); ESI-MS (914.13 calcd. For  $\text{C}_{64}\text{H}_{47}\text{N}_7$ ):  $m/z$  915.4046  $[\text{M} + \text{H}^+]^+$  (calcd  $m/z$ : 915.4049).

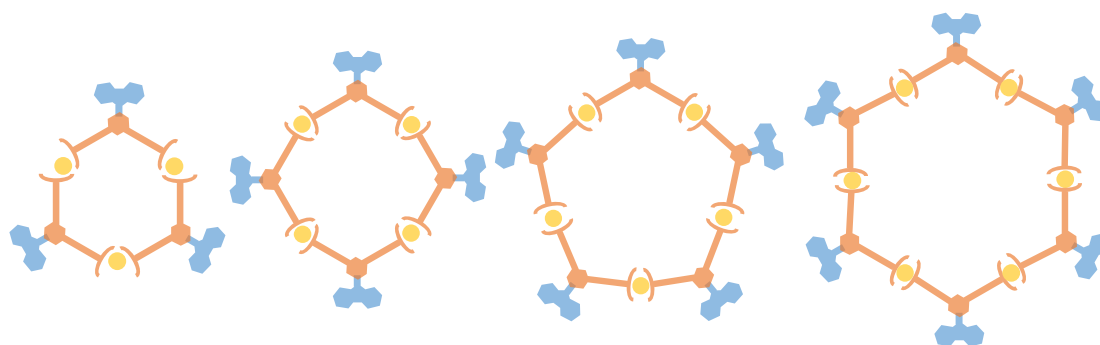

**Macrocycles 2:** Ligand **1** (10.00 mg, 0.011  $\mu\text{mol}$ ) and  $\text{Zn}(\text{NTf}_2)_2$  (7.19 mg, 0.011  $\mu\text{mol}$ ) was added to a 100 ml flask, then a solvent mixture of  $\text{CH}_3\text{OH}$  and  $\text{CHCl}_3$  (40 ml, V:V=1:2) was added. The mixture was refluxed for 12 h. After cooled to ambient temperature, excess bistrifluoromethanesulfonimide lithium salt ( $\text{LiNTf}_2$ ) in  $\text{CH}_3\text{OH}$  was added to get dark yellow precipitate, which was filtered and washed with  $\text{CH}_3\text{OH}$  to generate a dark yellow solid: 15 mg, 87.3%. The composition of **2** is a mixture of **Zn<sub>3</sub>1<sub>3</sub>**, **Zn<sub>4</sub>1<sub>4</sub>**, **Zn<sub>5</sub>1<sub>5</sub>** and **Zn<sub>6</sub>1<sub>6</sub>**.  $^1\text{H}$  NMR (400 MHz,  $\text{CD}_3\text{CN}$ )  $\delta$  9.02-8.98 (m, 4H,  $^{\text{tpy}}\text{-H}^{3',5'}$ ), 8.68-8.62 (d,  $J = 16$  Hz, 4H,  $^{\text{tpy}}\text{-H}^{3,3''}$ ), 8.44-8.36 (d,  $J = 32$  Hz, 2H,  $\text{H}^i$ ), 8.33-8.26 (m, 5H,  $\text{H}^j$ ,  $\text{H}^p$ ), 8.22-8.18 (m, 2H,  $\text{H}^n$ ), 8.03-7.96 (d,  $J = 28$  Hz, 4H,  $\text{H}^k$ ), 7.95-7.89 (s, 4H,  $^{\text{tpy}}\text{-H}^{6,6''}$ ), 7.74-7.66 (m, 6H,  $^{\text{tpy}}\text{-H}^{4,4''}$ ,  $\text{H}^g$ ), 7.60-7.54 (t,  $J = 24$  Hz, 2H,  $\text{H}^q$ ), 7.44-7.37 (t,  $J = 28$  Hz, 2H,  $\text{H}^m$ ), 2.20-2.17 (s, 12H,  $^{\text{tpy}}\text{-H}^{\text{Me}}$ ).

**Zn<sub>3</sub>1<sub>3</sub>**. ESI-MS ( $m/z$ ): 1259.4209 [ $\text{M-3NTf}$ ] $^{3+}$  (calcd  $m/z$ : 1259.64), 874.4438 [ $\text{M-4NTf}$ ] $^{4+}$  (calcd  $m/z$ : 874.45), 643.4419 [ $\text{M-5NTf}$ ] $^{5+}$  (calcd  $m/z$ : 643.73), 489.4450 [ $\text{M-6NTf}$ ] $^{6+}$  (calcd  $m/z$ : 489.75).

**Zn<sub>4</sub>1<sub>4</sub>**. ESI-MS ( $m/z$ ): 1259.3909 [ $\text{M-4NTf}$ ] $^{4+}$  (calcd  $m/z$ : 1259.64), 951.5995 [ $\text{M-5NTf}$ ] $^{5+}$  (calcd  $m/z$ : 951.80), 746.1029 [ $\text{M-6NTf}$ ] $^{6+}$  (calcd  $m/z$ : 746.38), 599.4463 [ $\text{M-7NTf}$ ] $^{7+}$  (calcd  $m/z$ : 599.73).

**Zn<sub>5</sub>1<sub>5</sub>**. ESI-MS ( $m/z$ ): 1259.4209 [ $\text{M-5NTf}$ ] $^{5+}$  (calcd  $m/z$ : 1259.64), 1003.0399 [ $\text{M-6NTf}$ ] $^{6+}$  (calcd  $m/z$ : 1003.04), 819.6668 [ $\text{M-7NTf}$ ] $^{7+}$  (calcd  $m/z$ : 819.70), 682.0152 [ $\text{M-8NTf}$ ] $^{8+}$  (calcd  $m/z$ : 682.22), 575.0616 [ $\text{M-9NTf}$ ] $^{9+}$  (calcd  $m/z$ : 575.29).

**Zn<sub>6</sub>1<sub>6</sub>**. ESI-MS ( $m/z$ ): 1259.4209 [ $\text{M-6NTf}$ ] $^{6+}$  (calcd  $m/z$ : 1259.64), 1039.6440 [ $\text{M-7NTf}$ ] $^{7+}$  (calcd  $m/z$ : 1039.64), 874.3638 [ $\text{M-8NTf}$ ] $^{8+}$  (calcd  $m/z$ : 874.69), 746.0029 [ $\text{M-9NTf}$ ] $^{9+}$  (calcd  $m/z$ : 746.38), 643.3619 [ $\text{M-10NTf}$ ] $^{10+}$  (calcd  $m/z$ : 643.73).

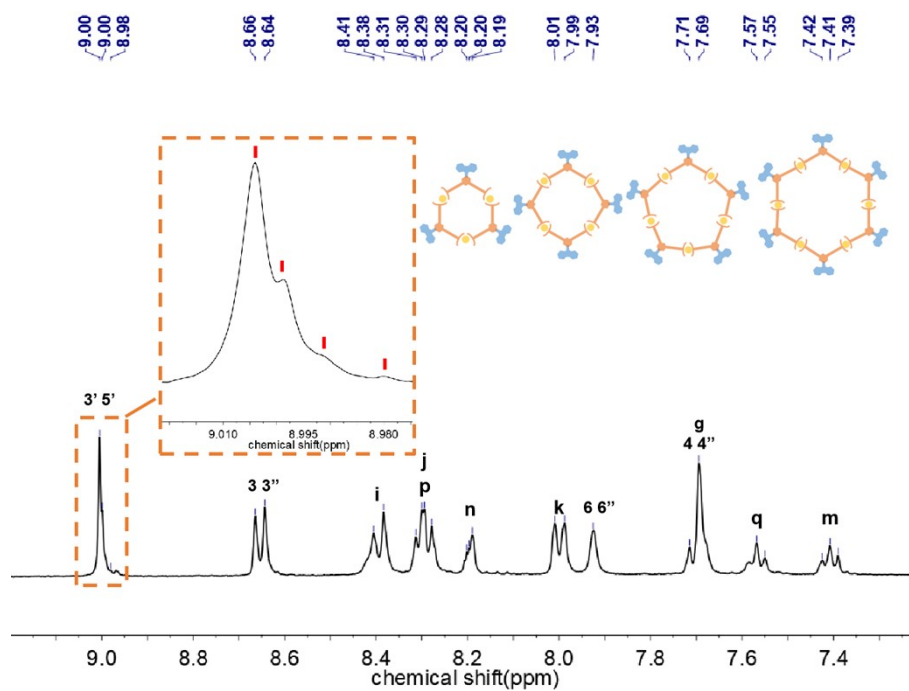

Figure S1.  $^1\text{H}$  NMR spectrum (400 MHz) of macrocycles **2** in  $\text{CD}_3\text{CN}$ .

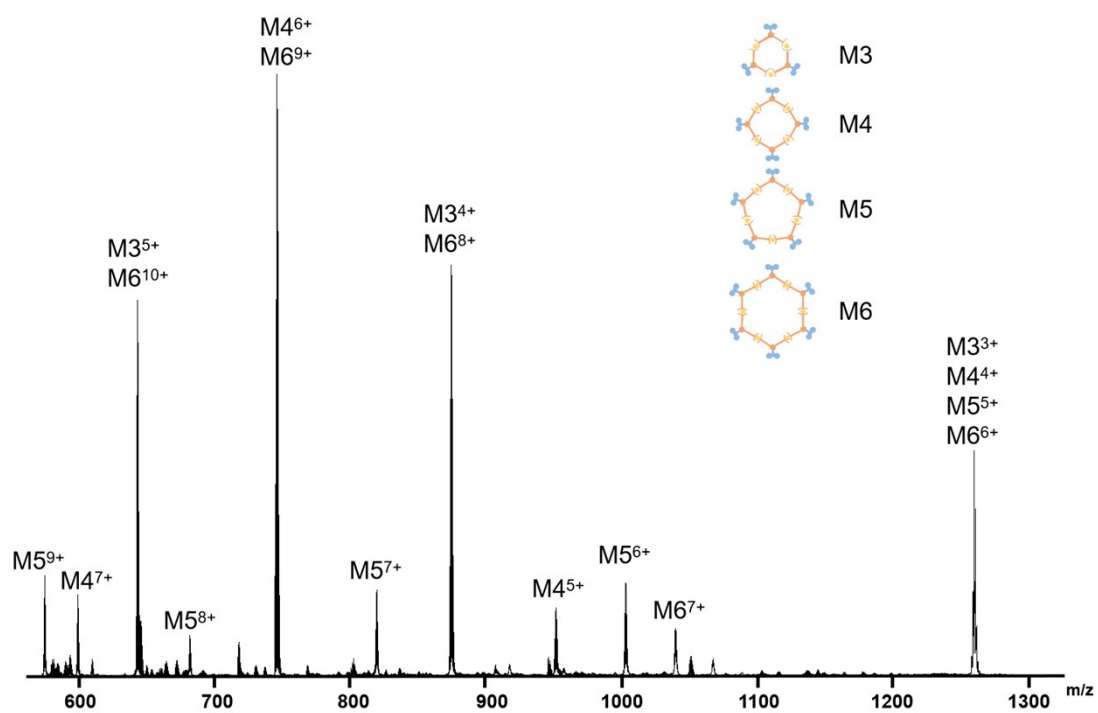

Figure S2. ESI-MS spectra of mixture of macrocycles **2** (M3, M4, M5 and M6).

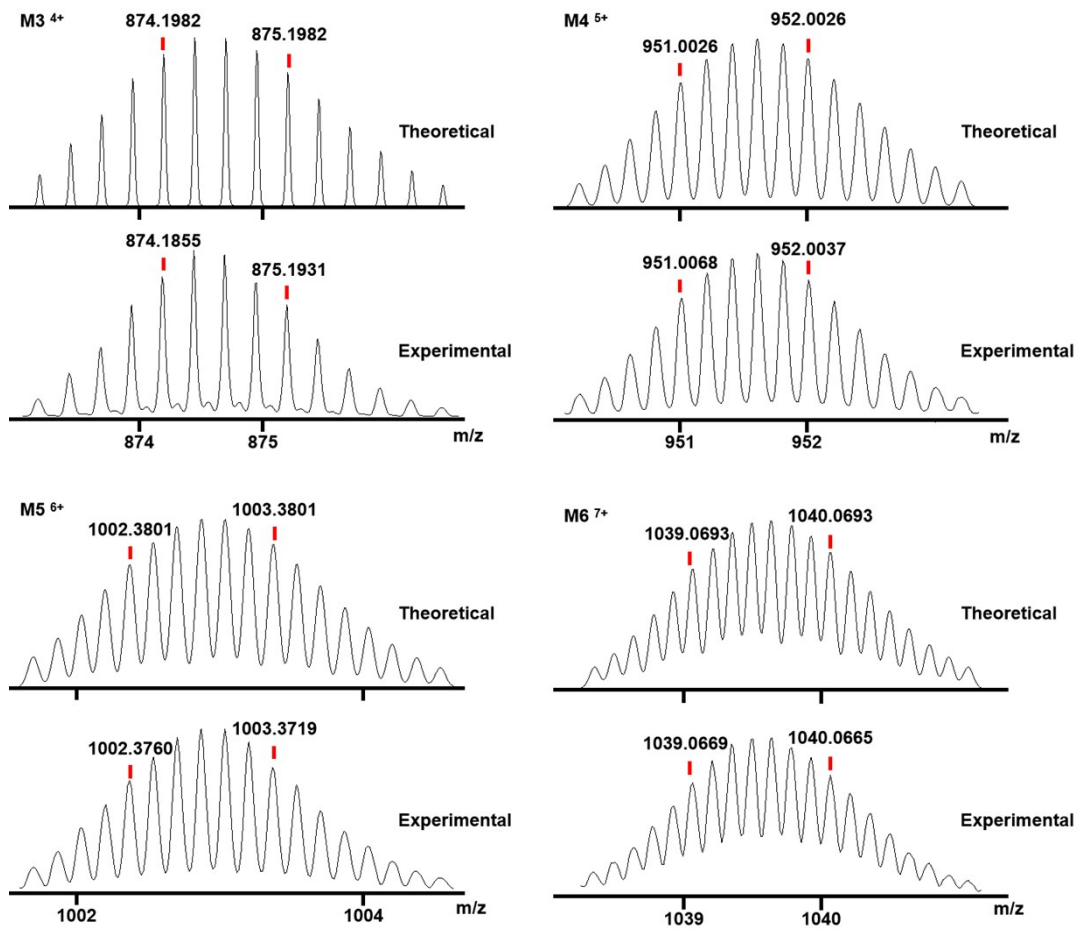

**Figure S3.** Theoretical (top) and experimental (bottom) isotope patterns for the different charge states observed from macrocycles **2** ( $\text{NTf}_2^-$  as counterion).

### 3. Synthesis of the ligand 3 and polymer 4

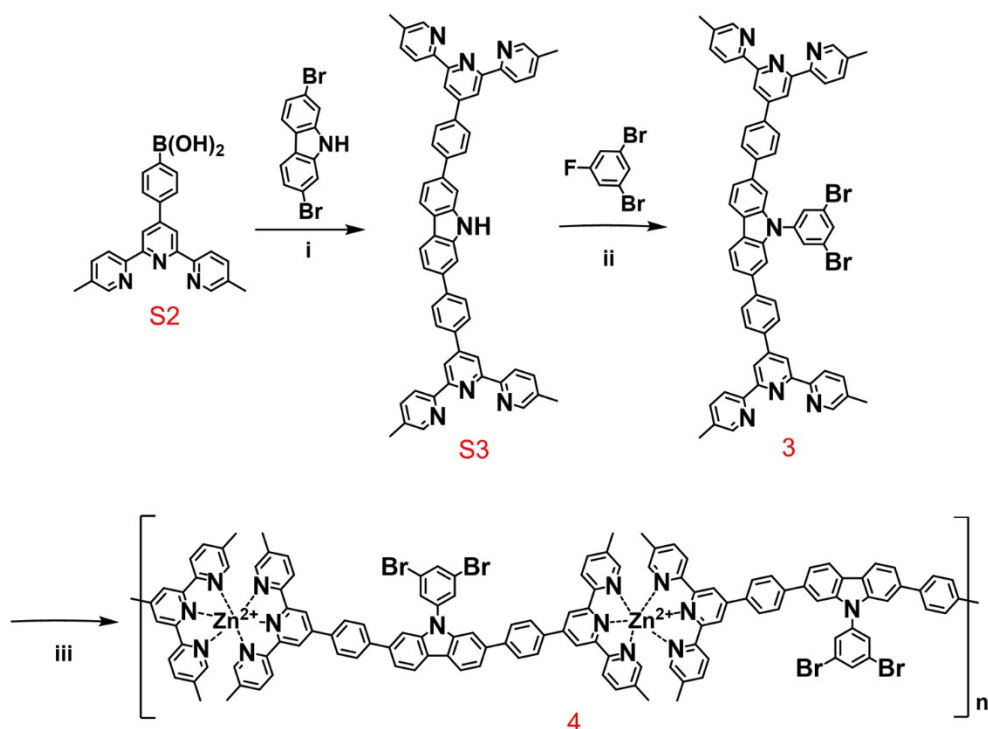

**Scheme S2.** Self-assembly polymer directed by Zn(II) ions. Reagents and conditions: (i) NaOH, Pd(PPh<sub>3</sub>)<sub>4</sub>, H<sub>2</sub>O, THF, N<sub>2</sub>, 48h, reflux; (ii) Cs<sub>2</sub>CO<sub>3</sub>, DMF, N<sub>2</sub>, 24h, reflux; (iii) 1 equiv Zn(NTf<sub>2</sub>)<sub>2</sub>, CHCl<sub>3</sub>/MeOH (2:1), 12h, reflux.

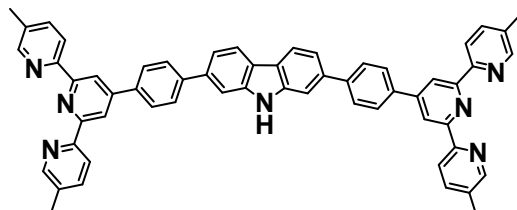

**Compound S3:** 2,7-Dibromo-9H-carbazole (2.13 g, 6.56 mmol), Compound S2 (6.00 g, 15.74 mmol) were added to a 250 mL flask, then THF (130 mL) and NaOH (1.57 g, 39.35 mmol) in 39.5 mL of water was added. The Pd(PPh<sub>3</sub>)<sub>4</sub> (0.76 g, 0.66 mmol) as the catalyst was added and the system was degassed using N<sub>2</sub>. The mixture was stirred at 85°C under nitrogen for 48h. After cooled to ambient temperature, the solvent was evaporated in vacuo followed by dissolution with CH<sub>2</sub>Cl<sub>2</sub>. The solvent was washed with CH<sub>2</sub>Cl<sub>2</sub> and MeOH, then filtered to afford compound **3** as a yellow solid: 4.25 g, 77%. <sup>1</sup>H NMR (400 MHz, CDCl<sub>3</sub>) δ 8.74 (s, 4H, H<sup>3',5'</sup>), 8.59-8.54 (m, 8H, H<sup>3,3''</sup>, H<sup>6,6''</sup>), 8.36 (s, 1H, H<sup>NH</sup>), 8.19-8.15 (d, J = 16 Hz, 2H, H<sup>i</sup>), 8.03-7.98 (d, J = 20 Hz, 4H, H<sup>j</sup>), 7.85-7.80 (d, J = 20 Hz, 4H, H<sup>k</sup>), 7.71-7.66 (m, 6H, H<sup>4,4''</sup>, H<sup>g</sup>), 7.61-7.56 (dd, 2H, H<sup>m</sup>), 2.44 (s, 12H, <sup>tpy</sup>-H<sup>Me</sup>); ESI-MS (838.03 calcd. For C<sub>58</sub>H<sub>43</sub>N<sub>7</sub>): m/z 838.3659 [M + H<sup>+</sup>]<sup>+</sup> (calcd m/z: 838.3658).



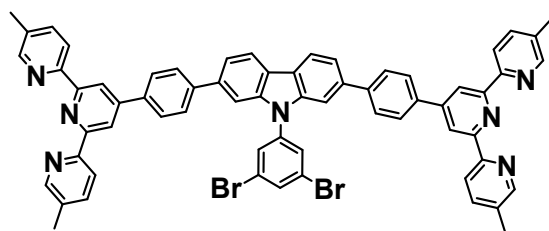

**Ligand 3:** compound **S3** (3.00 g, 3.58 mmol), 1,3-Dibromo-5-fluorobenzene (3.64 g, 14.32 mmol) was added to a 500 mL flask, then N,N-Dimethylformamide (150 mL) and Cs<sub>2</sub>CO<sub>3</sub> (4.67g, 14.32 mmol) was added. The mixture was stirred at 150°C under nitrogen for 24 h. After cooled to ambient temperature, the solvent was evaporated in vacuo followed by ultrasonic treatment with methanol for 1 hour. And then filtered to obtain flesh-colored solid: 3.5 g, 91%. <sup>1</sup>H NMR (400 MHz, CDCl<sub>3</sub>) δ 8.74 (s, 4H, H<sup>3',5'</sup>), 8.59-8.54 (m, 8H, H<sup>3,3''</sup>, H<sup>6,6''</sup>), 8.25-8.21 (d, J = 16 Hz, 2H, H<sup>i</sup>), 8.05-8.00 (d, J = 20 Hz, 4H, H<sup>j</sup>), 7.87-7.84 (t, J = 28 Hz, 1H, H<sup>p</sup>), 7.83-7.78 (dd, 6H, H<sup>n,k</sup>), 7.71-7.64 (td, 6H, H<sup>4,4''</sup>, H<sup>m</sup>), 7.62 (s, 2H, H<sup>g</sup>), 2.44 (s, 12H, t<sup>py</sup>-H<sup>Me</sup>); ESI-MS (1071.92 calcd. For C<sub>64</sub>H<sub>45</sub>Br<sub>2</sub>N<sub>7</sub>): m/z 1072.2189 [M + H]<sup>+</sup> (calcd m/z: 1072.2181).

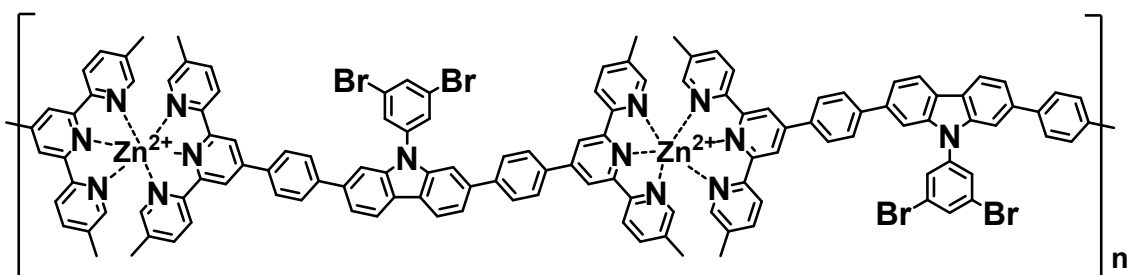

**Polymer 4:** Ligand **3** (10.00 mg, 9.3 μmol) and Zn(NTf)<sub>2</sub> (6.13 mg, 9.8 μmol) was added to a 100 ml flask, then a solvent mixture of CH<sub>3</sub>OH and CHCl<sub>3</sub> (40 ml, V:V=1:2) was added. The mixture was refluxed for 12 h. After cooled to ambient temperature, which was filtered and washed with CH<sub>3</sub>OH to obtain a slight yellow solid:14 mg, 86.8%.

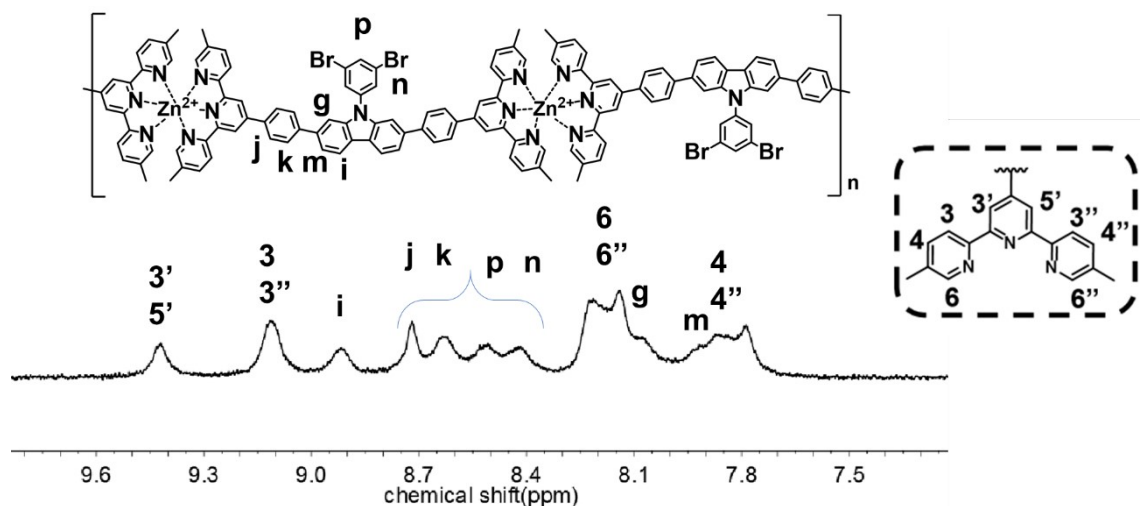

**Figure S4.** <sup>1</sup>H NMR spectrum (400 MHz) of Polymer **4** in DMSO-d<sub>6</sub>.

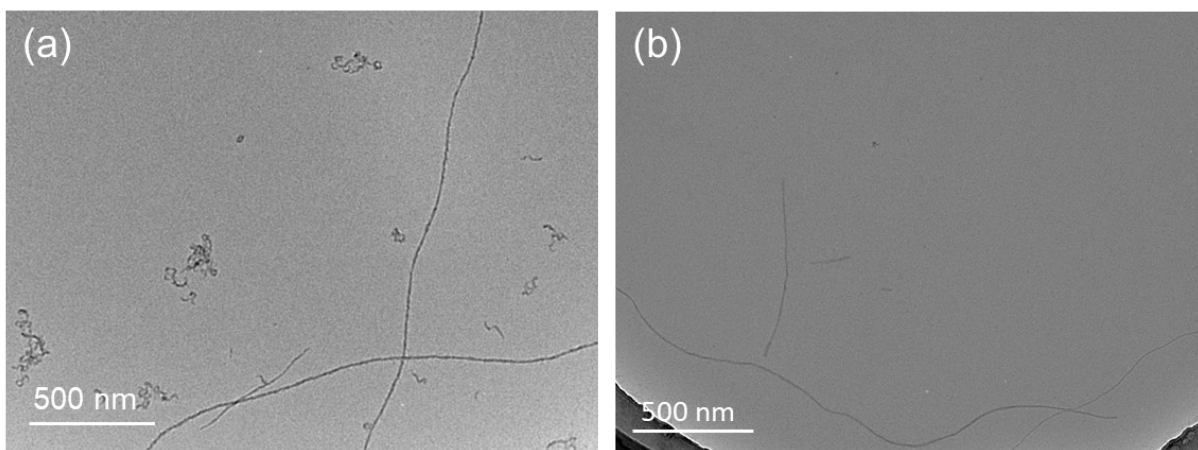

Figure S5. TEM images of polymer **4** on a carbon-coated Cu grid.

#### 4. Synthesis of the ligand LA and supramolecular macrocycles SA

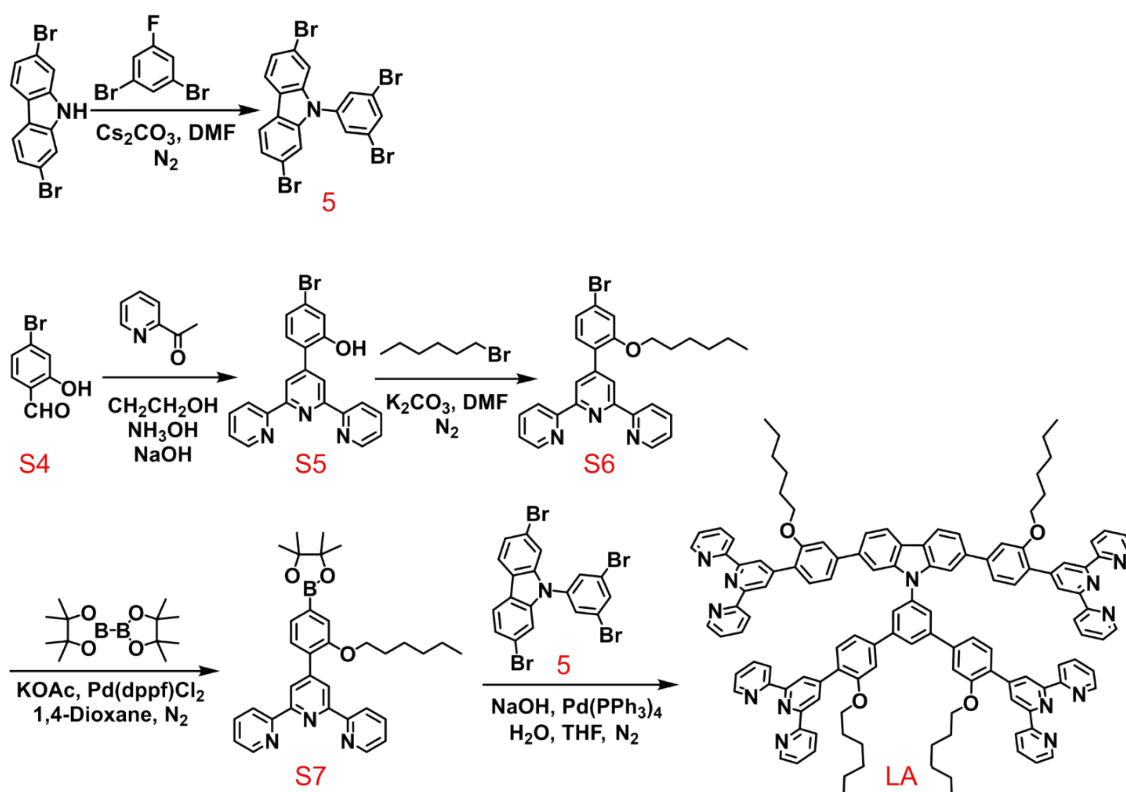

Scheme S3: The synthetic route of the Ligand LA.

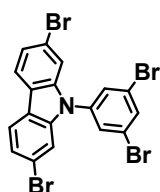

**Compound 5:** 2,7-Dibromo-9H-carbazole (1.00 g, 3.08 mmol), 1,3-Dibromo-5-fluorobenzene (3.125 g, 12.31 mmol) was added to a 50 mL flask, then N,N-Dimethylformamide (30 mL) and Cs<sub>2</sub>CO<sub>3</sub> (4.010 g, 12.31 mmol) was added. The mixture was stirred at 150°C under nitrogen for 24 h. After cooled to ambient temperature, the solvent was evaporated in vacuo followed by extraction with CH<sub>2</sub>Cl<sub>2</sub> and saturated sodium chloride solution for three times. The combined organic layer was dried over anhydrous Na<sub>2</sub>SO<sub>4</sub>, and the solvent was evaporated in vacuo and the residue was purified by column chromatography (silica gel), eluting with the mixture of petroleum ether and CH<sub>2</sub>Cl<sub>2</sub> to pure the product, as ivory solid: 1.3 g, 75%. <sup>1</sup>H NMR (400 MHz, CDCl<sub>3</sub>) δ 7.95-7.91 (dd, J = 8, 8 Hz, 2H, H<sup>i</sup>), 7.87-7.83 (t, J = 16 Hz, 1H, H<sup>p</sup>), 7.63-7.61 (d, J = 8 Hz, 2H, H<sup>g</sup>), 7.46-7.44 (d, J = 8 Hz, 3H, H<sup>m,n</sup>), 7.43-7.41 (d, J = 8 Hz, 1H, H<sup>m</sup>); <sup>13</sup>C NMR (101 MHz, CDCl<sub>3</sub>) δ 141.42, 138.74, 134.32, 129.18, 124.43, 124.21, 121.95, 121.66, 120.35, 112.81; ESI-MS (558.89 calcd. For C<sub>18</sub>H<sub>9</sub>Br<sub>4</sub>N): m/z 559.7409 [M + H]<sup>+</sup> (calcd m/z: 559.7468).

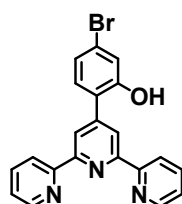

**Compound S5:** 4-Bromo-2-hydroxybenzaldehyde (12.0 g, 59.7 mmol), 1-(Pyridin-2-yl)ethanone (15.9 g, 131.3 mmol) and NaOH (7.2 g, 179.1 mmol) was added to a 500 mL flask, then CH<sub>3</sub>CH<sub>2</sub>OH(150 mL) was added. The mixture was stirred at room temperature for 12 h. The NH<sub>3</sub>·H<sub>2</sub>O was added to the mixture, and then the mixture was stirred at 80°C for 24 h. After cooled to ambient temperature, the precipitate was filtered and washed with isopropanol to afford compound 2 as a yellow solid (13.3 g, 55%). <sup>1</sup>H NMR (400 MHz, MeOD) δ 8.69 (s, 2H, H<sup>3',5'</sup>), 8.67-8.63 (d, J = 16 Hz, 2H, H<sup>3,3''</sup>), 8.59-8.54 (d, J = 20 Hz, 2H, H<sup>6,6''</sup>), 8.00-7.93 (td, 2H, H<sup>4,4''</sup>), 7.46-7.40 (ddd, 2H, H<sup>5,5''</sup>), 7.29-7.25 (d, J = 16 Hz, 1H, H<sup>j</sup>), 6.94-6.90 (d, J = 16 Hz, 1H, H<sup>i</sup>), 6.67-6.63 (dd, 1H, H<sup>k</sup>); <sup>13</sup>C NMR (101 MHz, MeOD) δ 167.18, 156.82, 154.92, 151.53, 148.62, 137.19, 130.33, 126.25, 123.51, 123.47, 123.27, 121.72, 121.46, 116.01; ESI-MS (404.27 calcd. For C<sub>21</sub>H<sub>14</sub>BrN<sub>3</sub>O): m/z 405.0393 [M + H]<sup>+</sup> (calcd m/z: 405.0398).

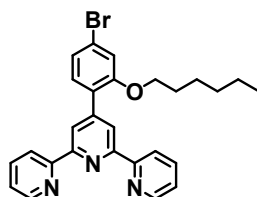

**Compound S6:** Compound S5 (3 g, 7.42 mmol), bromohexane (2.5 g, 14.84 mmol) was added to a 100 mL flask, then N,N-Dimethylformamide (30 mL) and K<sub>2</sub>CO<sub>3</sub> (3 g, 22.26 mmol) was added. The mixture was stirred at 55°C under N<sub>2</sub> for 12 h. After the reaction mixture cooled to ambient temperature, the solvent was evaporated under reduced pressure. The resultant residue was dissolved in CH<sub>2</sub>Cl<sub>2</sub> (100 mL) and washed twice with water (100 mL). The organic phase was combined and dried over anhydrous Na<sub>2</sub>SO<sub>4</sub>, the solvent was evaporated to give compound 3 (3.414 g, 93.8%) as SandyBrown solid. <sup>1</sup>H NMR (400 MHz, CDCl<sub>3</sub>) δ 8.72-8.67 (d, J = 20 Hz, 2H, H<sup>3,3''</sup>), 8.67-8.63 (t, 4H, H<sup>3',5'</sup>, H<sup>6,6''</sup>), 7.90-7.83 (td, 2H, H<sup>4,4''</sup>), 7.45-7.40 (d, J = 20 Hz, 1H, H<sup>j</sup>), 7.35-7.29 (ddd, 2H, H<sup>5,5''</sup>), 7.22-7.17 (dd, 1H, H<sup>k</sup>), 7.15-7.11 (d, J = 16 Hz, 1H, H<sup>b</sup>), 4.11-3.91 (t, 2H, H<sup>a</sup>), 1.84-1.57 (m, 6H, H<sup>c,d,e,f</sup>), 0.81-0.65 (t, 3H, H<sup>b</sup>); <sup>13</sup>C NMR (101 MHz, MeOD) δ 167.18, 156.82, 154.92, 151.53, 148.62,

137.19, 130.33, 126.25, 123.51, 123.47, 123.27, 121.72, 121.46, 116.01; ESI-MS (488.43 calcd. For  $C_{27}H_{26}BrN_3O$ ):  $m/z$  489.1338  $[M + H]^+$  (calcd  $m/z$ : 489.1337).

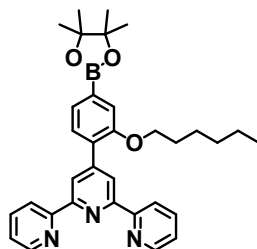

**Compound S7:** Compound **S6** (6.9 g, 14.13 mmol), Bis-(pinacolato)diboron (8.9 g, 35.32 mmol), KOAc (4.2 g, 42.38 mmol), Pd(dppf)Cl<sub>2</sub> (0.4 g, 0.57 mmol) was added to a 250 mL three-necked flask. The system was degassed with N<sub>2</sub> for 10 min, and then anhydrous 1,4- Dioxane (85 mL) was injected into the flask. The mixture was stirred at 80°C under N<sub>2</sub> for 12 h. After cooled to ambient temperature, the solvent was evaporated under reduced pressure, then concentrated in vacuo followed by column chromatography (Al<sub>2</sub>O<sub>3</sub>), eluting with the mixture of petroleum and CH<sub>2</sub>Cl<sub>2</sub> to pure the product, as white thick solid: 6.5 g, 86%. <sup>1</sup>H NMR (400 MHz, CDCl<sub>3</sub>) δ 8.70 (s, 2H, H<sup>3',5'</sup>), 8.70-8.67 (d, J = 12 Hz, 2H, H<sup>3,3''</sup>), 8.67-8.62 (d, J = 20 Hz, 2H, H<sup>6,6''</sup>), 7.88-7.82 (td, 2H, H<sup>4,4''</sup>), 7.60-7.55 (d, J = 20 Hz, 1H, H<sup>j</sup>), 7.52-7.46 (d, J = 24 Hz, 1H, H<sup>k</sup>), 7.40 (s, 1H, H<sup>h</sup>), 7.34-7.28 (ddd, 2H, H<sup>5,5''</sup>), 4.14-4.00 (t, 2H, H<sup>a</sup>), 1.80-1.61 (m, 4H, H<sup>c,d</sup>), 1.37 (s, 12H, H<sup>12</sup>), 1.18-1.05 (m, 4H, H<sup>e,f</sup>), 0.76-0.67 (t, 3H, H<sup>b</sup>); <sup>13</sup>C NMR (101 MHz, CDCl<sub>3</sub>) δ 156.44, 155.82, 155.02, 149.00, 148.27, 136.62, 131.05, 129.91, 127.31, 123.47, 121.77, 121.12, 117.90, 83.85, 83.38, 77.56, 77.24, 76.92, 68.44, 31.47, 29.15, 25.77, 24.96, 24.85, 24.80, 24.75, 24.52, 22.30, 13.90; ESI-MS (535.50 calcd. For C<sub>33</sub>H<sub>38</sub>BN<sub>3</sub>O<sub>3</sub>):  $m/z$  536.3124  $[M + H]^+$  (calcd  $m/z$ : 536.3121).

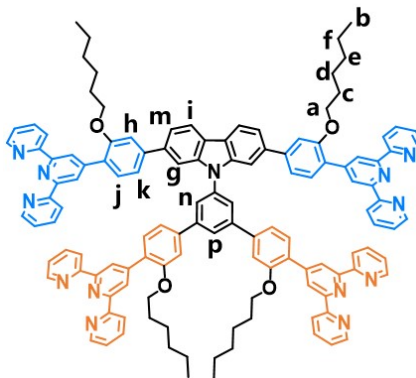

**Ligand LA:** Compound **5** (0.50 g, 0.89 mmol) and compound **S7** (2.87 g, 5.35 mmol) was added to a 250 mL flask, then THF (66 mL) and NaOH (0.43 g, 10.74 mmol) in 11 mL of water was added. The system was degassed for 10 min, and Pd(PPh<sub>3</sub>)<sub>4</sub> (0.21 g, 0.18 mmol) as the catalyst was added. The mixture was stirred at 85°C under nitrogen for 4 days, after cooled to ambient temperature, then concentrated in vacuo followed by column chromatography (Al<sub>2</sub>O<sub>3</sub>), eluting with the mixture of petroleum ether and CH<sub>2</sub>Cl<sub>2</sub> to pure the product, as white solid: 544 mg, 32%. <sup>1</sup>H NMR (400 MHz, CDCl<sub>3</sub>) δ 8.79-8.74 (d, J = 20 Hz, 8H, <sup>A,B</sup>-tpy-H<sup>3',5'</sup>), 8.71-8.62 (m, 16H, <sup>A,B</sup>-tpy-H<sup>3',3'',6',6''</sup>), 8.34-8.29 (d, J = 25 Hz, 2H, H<sup>i</sup>), 8.08 (s, 1H, H<sup>p</sup>), 8.02-1.99 (d, J = 12 Hz, 2H, H<sup>n</sup>), 7.89-7.81 (td, 10H, <sup>A,B</sup>-tpy-H<sup>4',4''</sup>, H<sup>g</sup>), 7.77-7.73 (d, J = 16 Hz, 2H, <sup>B</sup>-tpy-H<sup>j</sup>), 7.71-7.66 (d, J = 20 Hz, 4H, <sup>A</sup>-tpy-H<sup>j</sup>, H<sup>m</sup>), 7.51-7.47 (dd, 2H, <sup>B</sup>-tpy-H<sup>k</sup>), 7.42-7.38 (dd, 2H, <sup>A</sup>-tpy-H<sup>k</sup>), 7.38-7.35 (d, J = 12 Hz, 2H, <sup>B</sup>-tpy-H<sup>h</sup>), 7.33-7.28 (m, 10H, <sup>A,B</sup>-tpy-H<sup>5,5''</sup>, <sup>A</sup>-tpy-H<sup>h</sup>), 4.14-4.07 (dd, 8H, H<sup>a</sup>), 1.78-1.69 (m, 8H, H<sup>c</sup>), 1.44-1.36 (m, 8H, H<sup>d</sup>), 1.17-1.02 (m, 16H, H<sup>e,f</sup>), 0.71-0.63 (m, 12H, H<sup>b</sup>); <sup>13</sup>C NMR (101 MHz, CDCl<sub>3</sub>) δ 141.42,

138.74, 134.32, 129.18, 124.43, 124.21, 121.95, 121.66, 120.35, 112.81; ESI-MS (1873.38 calcd. for  $C_{126}H_{113}N_{13}O_4$ ):  $m/z$  1874.9193  $[M + H]^+$  (calcd  $m/z$ : 1874.9194).

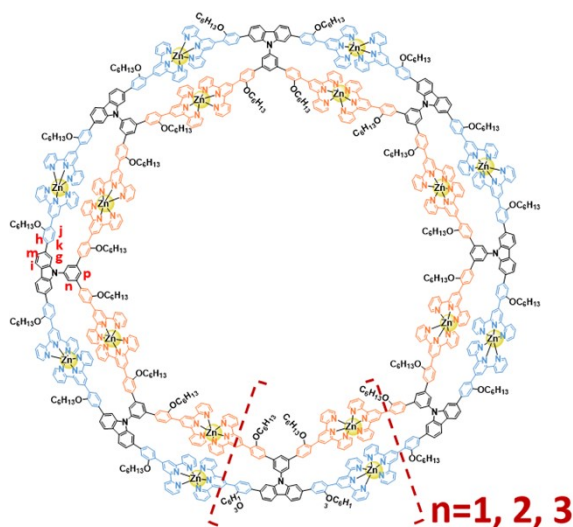

**Supramolecular macrocycles SA:** Ligand LA (11.15 mg, 5.95  $\mu\text{mol}$ ) and  $\text{Zn}(\text{NTf}_2)_2$  (7.45 mg, 11.90  $\mu\text{mol}$ ) was added to a 100 ml flask, then a solvent mixture of MeOH and  $\text{CHCl}_3$  (30 ml, V:V=1:2) was added. The mixture was refluxed for 12 h. After cooled to ambient temperature, excess bistrifluoromethanesulfonimide lithium salt ( $\text{LiNTf}_2$ ) in MeOH was added to get a faint yellow precipitate, which was filtered and washed with MeOH to generate a faint yellow solid: 17 mg, 91.4%. The composition of SA is a mixture of  $\text{Zn}_{16}\text{LA}_8$ ,  $\text{Zn}_{18}\text{LA}_9$  and  $\text{Zn}_{20}\text{LA}_{10}$ .  $^1\text{H}$  NMR (400 MHz,  $\text{CD}_3\text{CN}$ )  $\delta$  9.24-9.03 (m, 8H, A,B-tpy- $\text{H}^{3',5'}$ ), 8.81-8.57 (m, 8H, A,B-tpy- $\text{H}^{3,3''}$ ), 8.49 (m, 2H,  $\text{H}^i$ ), 8.32 (m, 1H,  $\text{H}^p$ ), 8.19-7.82 (m, 11H, A,B-tpy- $\text{H}^{4,4''}$ ,  $\text{H}^{n,g}$ ), 7.77-7.62 (m, 14H, A,B-tpy- $\text{H}^{6,6''}$ ,  $\text{H}^j$ ,  $\text{H}^m$ ), 7.40-7.25 (m, 16H, A,B-tpy- $\text{H}^{5,5''}$ ,  $\text{H}^h$ ,  $\text{H}^k$ ), 4.51-4.17 (m, 4H,  $\text{H}^a$ ), 1.89-1.68 (m, 4H,  $\text{H}^c$ ), 1.47-1.21 (m, 4H,  $\text{H}^d$ ), 1.08-0.78 (m, 4H,  $\text{H}^e$ ), 0.77-0.45 (m, 4H,  $\text{H}^f$ ), 0.37-0.06 (m, 4H,  $\text{H}^b$ ).  **$\text{Zn}_{16}\text{LA}_8$ .** ESI-MS ( $m/z$ ): 2844.6199  $[\text{M}-8\text{NTf}_2^-]^{8+}$  (calcd  $m/z$ : 2844.6400), 2794.2146  $[\text{M}-9\text{NTf}_2^-]^{9+}$  (calcd  $m/z$ : 2497.4422), 2219.6289  $[\text{M}-10\text{NTf}_2^-]^{10+}$  (calcd  $m/z$ : 2219.684), 1992.3918  $[\text{M}-11\text{NTf}_2^-]^{11+}$  (calcd  $m/z$ : 1992.4273), 1803.1204  $[\text{M}-12\text{NTf}_2^-]^{12+}$  (calcd  $m/z$ : 1803.0467), 1642.8075  $[\text{M}-13\text{NTf}_2^-]^{13+}$  (calcd  $m/z$ : 1642.8015), 1505.4685  $[\text{M}-14\text{NTf}_2^-]^{14+}$  (calcd  $m/z$ : 1505.4486), 1386.4355  $[\text{M}-15\text{NTf}_2^-]^{15+}$  (calcd  $m/z$ : 1386.4093), 1282.2284  $[\text{M}-16\text{NTf}_2^-]^{16+}$  (calcd  $m/z$ : 1282.2500), 1190.3326  $[\text{M}-17\text{NTf}_2^-]^{17+}$  (calcd  $m/z$ : 1190.3447), 1108.6614  $[\text{M}-18\text{NTf}_2^-]^{18+}$  (calcd  $m/z$ : 1108.6511), 1035.5750  $[\text{M}-19\text{NTf}_2^-]^{19+}$  (calcd  $m/z$ : 1035.5568), 969.6026  $[\text{M}-20\text{NTf}_2^-]^{20+}$  (calcd  $m/z$ : 969.7720), 910.3305  $[\text{M}-21\text{NTf}_2^-]^{21+}$  (calcd  $m/z$ : 910.2524), 856.1362  $[\text{M}-22\text{NTf}_2^-]^{22+}$  (calcd  $m/z$ : 856.1436).  **$\text{Zn}_{18}\text{LA}_9$ .** ESI-MS ( $m/z$ ): 1728.7234  $[\text{M}-14\text{NTf}_2^-]^{14+}$  (calcd  $m/z$ : 1728.6471), 1594.6934  $[\text{M}-15\text{NTf}_2^-]^{15+}$  (calcd  $m/z$ : 1594.7280), 1477.4442  $[\text{M}-16\text{NTf}_2^-]^{16+}$  (calcd  $m/z$ : 1477.5488), 1374.1235  $[\text{M}-17\text{NTf}_2^-]^{17+}$  (calcd  $m/z$ : 1374.1553), 1282.2284  $[\text{M}-18\text{NTf}_2^-]^{18+}$  (calcd  $m/z$ : 1282.2500), 1200.0233  $[\text{M}-19\text{NTf}_2^-]^{19+}$  (calcd  $m/z$ : 1200.0189), 1125.9264  $[\text{M}-20\text{NTf}_2^-]^{20+}$  (calcd  $m/z$ : 1126.0110), 1059.0728  $[\text{M}-21\text{NTf}_2^-]^{21+}$  (calcd  $m/z$ : 1059.0514), 998.1652  $[\text{M}-22\text{NTf}_2^-]^{22+}$  (calcd  $m/z$ : 998.1791), 942.4628  $[\text{M}-23\text{NTf}_2^-]^{23+}$  (calcd  $m/z$ : 942.6000), 891.6550  $[\text{M}-24\text{NTf}_2^-]^{24+}$  (calcd  $m/z$ : 891.6525), 844.7531  $[\text{M}-25\text{NTf}_2^-]^{25+}$  (calcd  $m/z$ : 844.7808).  **$\text{Zn}_{20}\text{LA}_{10}$ .** ESI-MS ( $m/z$ ): 2123.5181  $[\text{M}-13\text{NTf}_2^-]^{13+}$  (calcd  $m/z$ : 2123.5369), 1951.8488  $[\text{M}-14\text{NTf}_2^-]^{14+}$  (calcd  $m/z$ : 1951.8457), 1803.1204  $[\text{M}-15\text{NTf}_2^-]^{15+}$  (calcd  $m/z$ : 1803.0467), 1672.7977  $[\text{M}-16\text{NTf}_2^-]^{16+}$  (calcd  $m/z$ : 1672.8475), 1557.9265  $[\text{M}-17\text{NTf}_2^-]^{17+}$  (calcd  $m/z$ : 1557.9659), 1455.9407  $[\text{M}-18\text{NTf}_2^-]^{18+}$

(calcd  $m/z$ : 1455.8489), 1364.4136  $[M-19NTf_2^-]^{19+}$  (calcd  $m/z$ : 1364.4811), 1282.2284  $[M-20NTf_2^-]^{20+}$  (calcd  $m/z$ : 1282.2500), 1207.8102  $[M-21NTf_2^-]^{21+}$  (calcd  $m/z$ : 1207.8505), 1140.1382  $[M-22NTf_2^-]^{22+}$  (calcd  $m/z$ : 1140.2145), 1078.3562  $[M-23NTf_2^-]^{23+}$  (calcd  $m/z$ : 1078.4600), 1021.9628  $[M-24NTf_2^-]^{24+}$  (calcd  $m/z$ : 1021.8517).

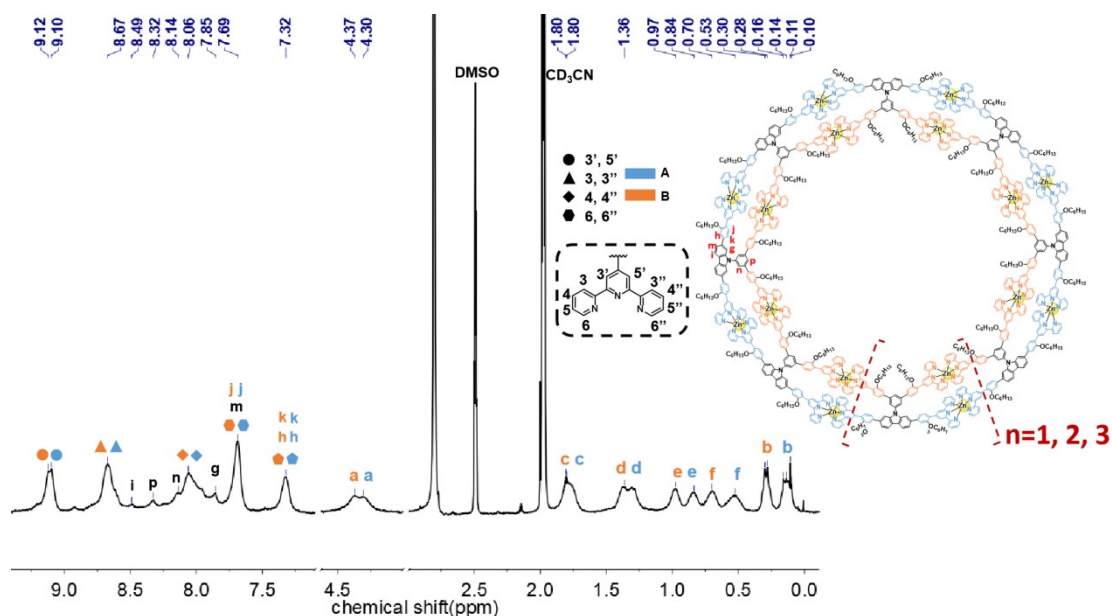

**Figure S6.**  $^1H$  NMR spectrum (400 MHz) of supramolecular macrocycles SA in DMSO- $d_6$ /CD $_3$ CN (1:9).

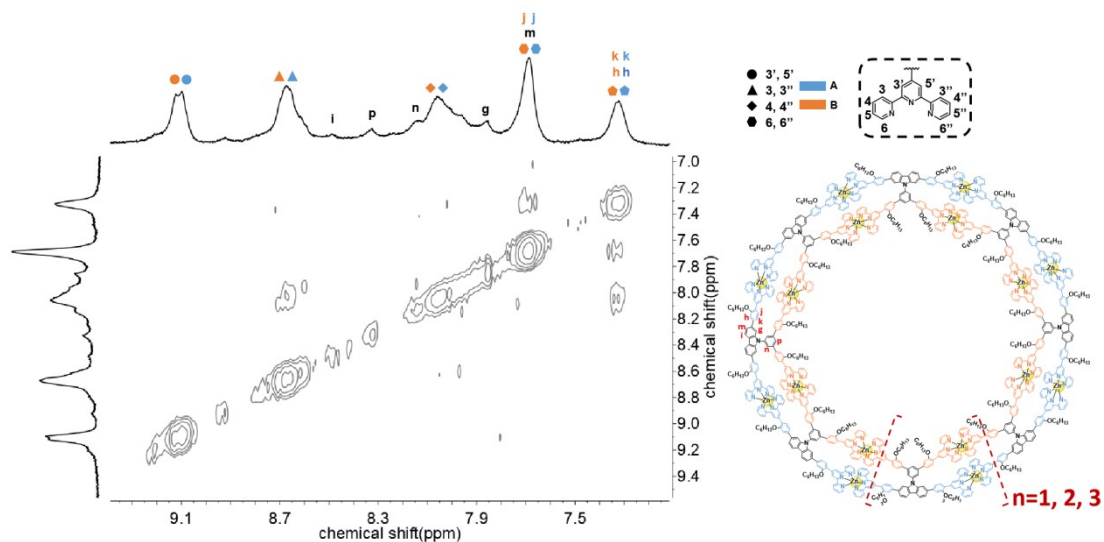

**Figure S7.** 2D COSY NMR spectrum (400 MHz) of supramolecular macrocycles SA in DMSO- $d_6$ /CD $_3$ CN (1:9).

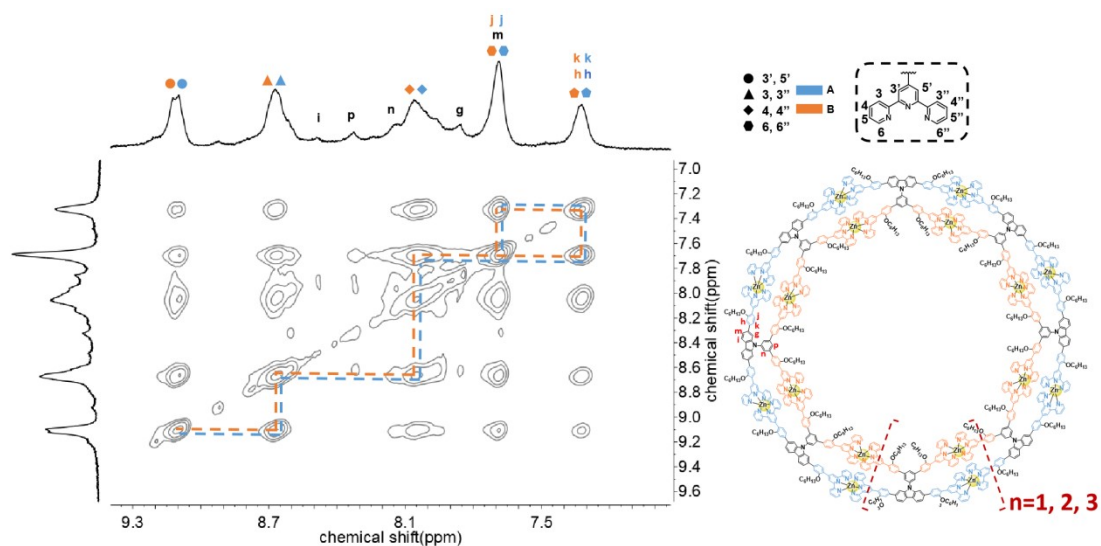

Figure S8. 2D NOESY NMR spectrum (400 MHz) of supramolecular macrocycles SA in DMSO- $d_6$ /CD $_3$ CN (1:9).

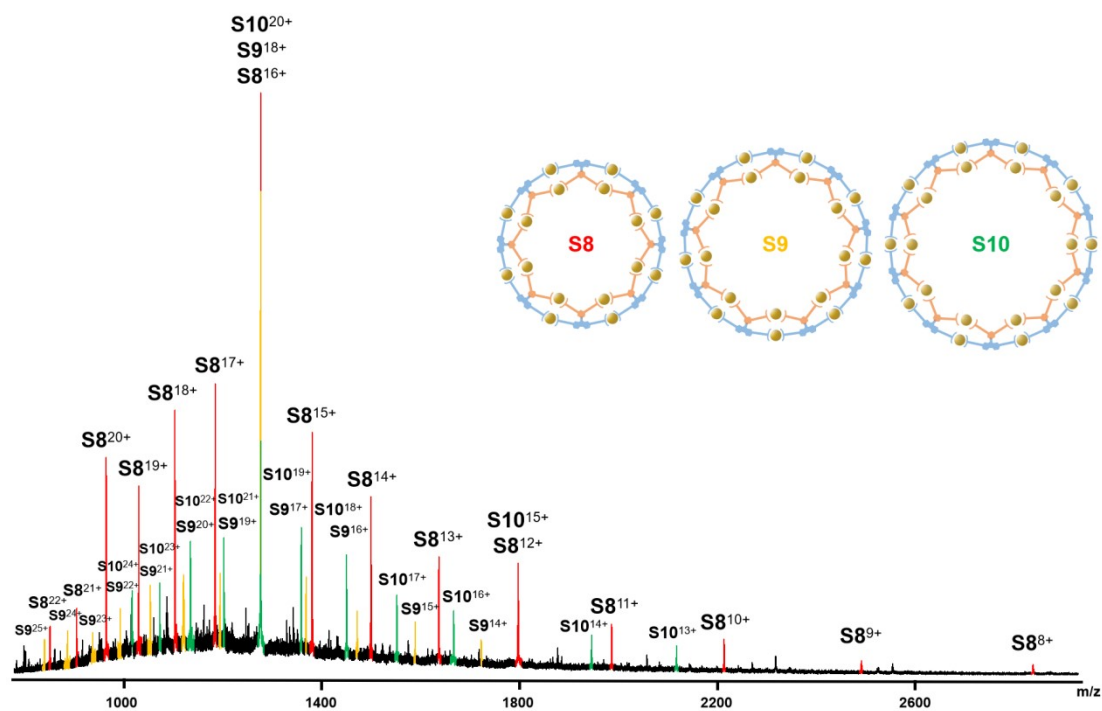

Figure S9. ESI-MS spectrum of supramolecular macrocycles SA ( $\text{NTf}_2^-$  as counterion).

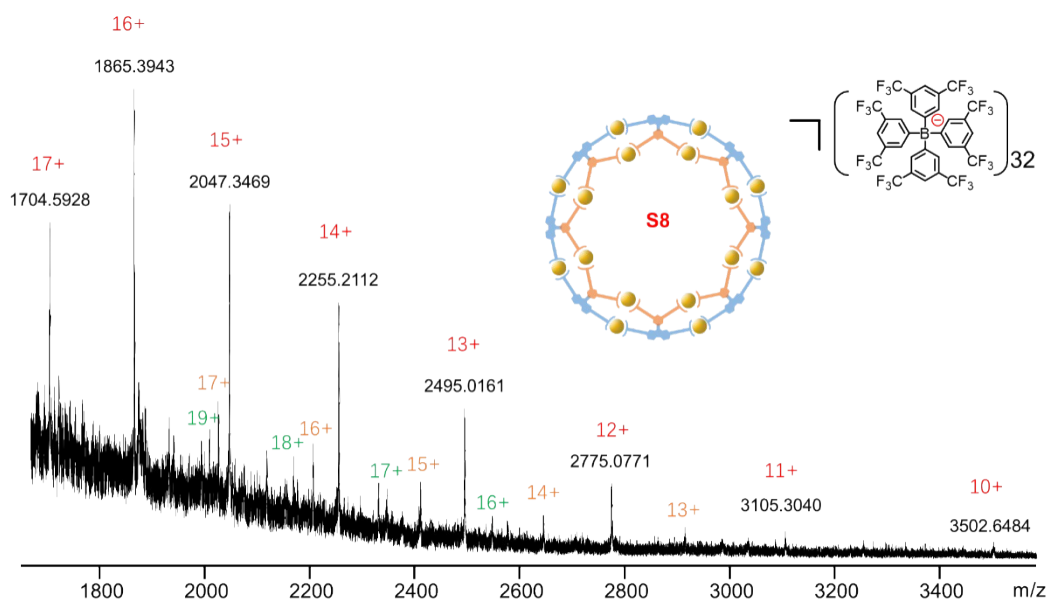

**Figure S10.** ESI-MS spectrum of supramolecular macrocycles SA ( $C_{32}H_{12}BF_{24}^-$  as counterion), which displayed a series of major ESI-MS peaks that derived from the giant dual-rim octamer nanoring.

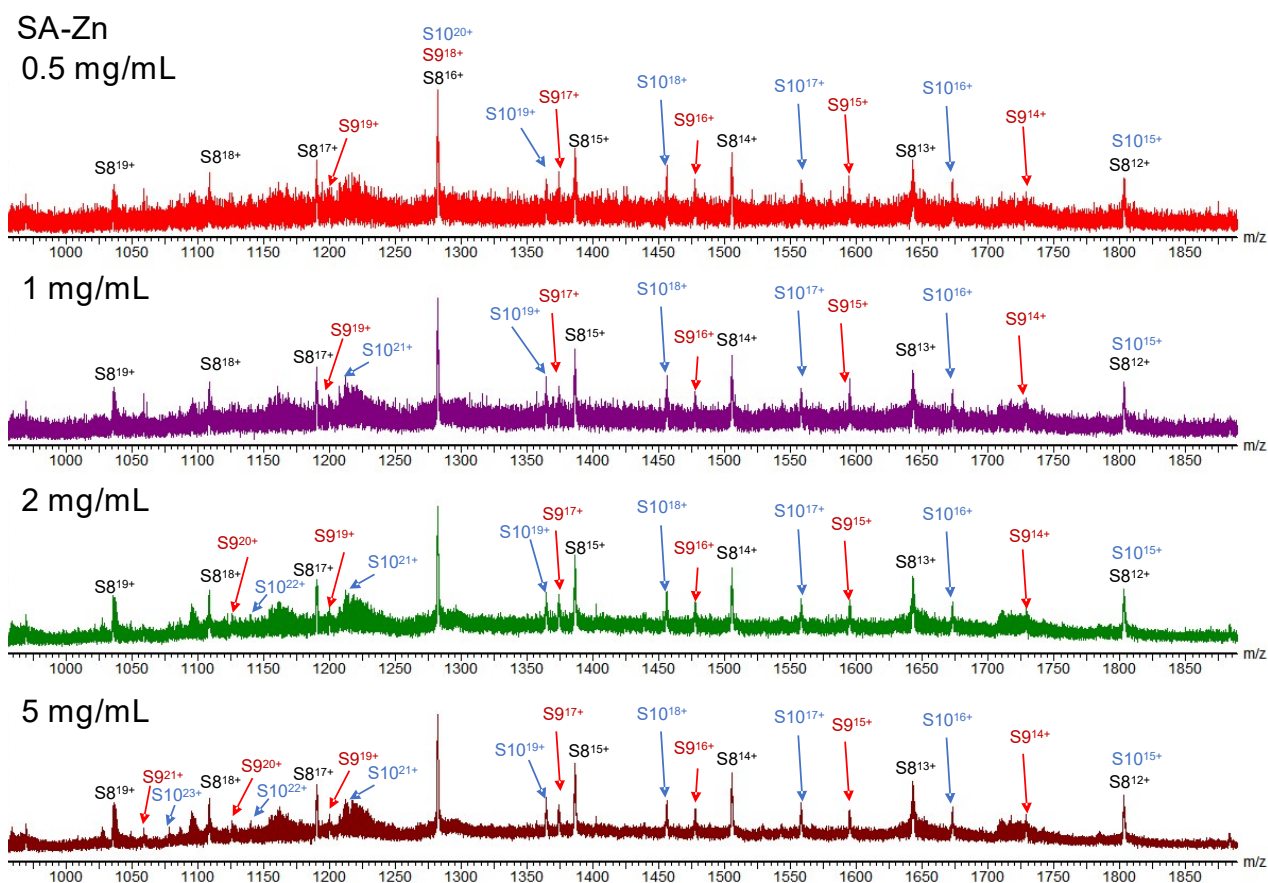

**Figure S11.** ESI-MS spectrum of the SA-Zn with concentration ranging from 0.5 mg/mL to 5 mg/mL.



## 5. Synthesis of the ligand LB and supramolecular macrocycles SB

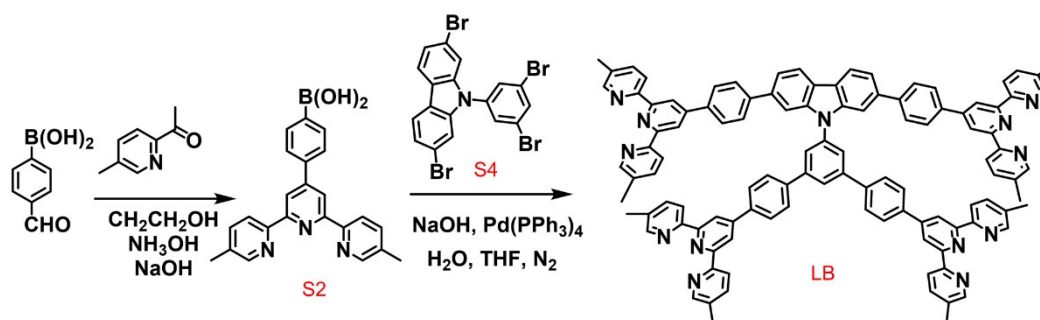

**Scheme S2:** The synthetic route of the Ligand LB.

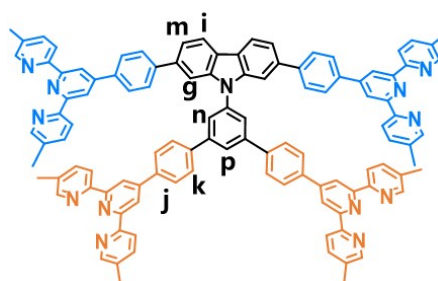

**Compound LB:** Compound **1** (0.5 g, 0.89 mmol), Compound **5** (1.774 g, 4.65 mmol) were added to a 250 mL flask, then THF (80 mL) and NaOH (0.429 g, 10.74 mmol) in 11 mL of water was added. The Pd(PPh<sub>3</sub>)<sub>4</sub> (0.2 g, 0.18 mmol) as the catalyst was added and the system was degassed using N<sub>2</sub>. The mixture was stirred at 85°C under nitrogen for 4 days, after cooled to ambient temperature, then concentrated in vacuo followed by column chromatography (Al<sub>2</sub>O<sub>3</sub>), eluting with the mixture of petroleum ether and CH<sub>2</sub>Cl<sub>2</sub> to pure the product, as golden yellow solid: 0.856 g, 61%. <sup>1</sup>H NMR (600 MHz, CDCl<sub>3</sub>) δ 8.73-8.67 (d, J = 36 Hz, 8H, <sup>A,B</sup>-tpy-H<sup>3',5'</sup>), 8.51 (m, 16H, <sup>A,B</sup>-tpy-H<sup>3'',3''',6,6''</sup>), 8.27-8.23 (d, J = 24 Hz, 2H, H<sup>i</sup>), 8.09 (s, 1H, H<sup>p</sup>), 8.05-8.01 (d, J = 24 Hz, 4H, <sup>A</sup>-tpy-H<sup>j</sup>), 7.99-7.95 (d, J = 24 Hz, 4H, <sup>B</sup>-tpy-H<sup>j</sup>), 7.94 (s, 2H, H<sup>g</sup>), 7.89-7.85 (d, J = 24 Hz, 4H, <sup>A</sup>-tpy-H<sup>k</sup>), 7.83-7.79 (d, J = 24 Hz, 6H, H<sup>n</sup>, <sup>B</sup>-tpy-H<sup>k</sup>), 7.68-7.60 (m, 10H, <sup>A,B</sup>-tpy-H<sup>4,4''</sup>), 2.38 (s, 24H, <sup>A,B</sup>-Me-H<sup>5,5''</sup>). <sup>13</sup>C NMR (101 MHz, CDCl<sub>3</sub>) δ 141.42, 138.74, 134.32, 129.18, 124.43, 124.21, 121.95, 121.66, 120.35, 112.81; ESI-MS (1584.95 calcd. For C<sub>110</sub>H<sub>81</sub>N<sub>13</sub>): m/z 1585.6815 [M + H]<sup>+</sup> (calcd m/z: 1585.6816).

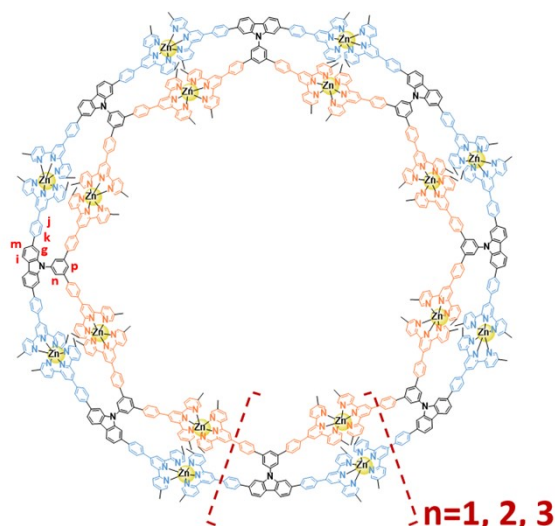

**Supramolecular macrocycles SB:** Ligand **LB** (5.22 mg, 3.29  $\mu\text{mol}$ ) and  $\text{Zn}(\text{NTf}_2)_2$  (4.12 mg, 6.59  $\mu\text{mol}$ ) was added to a 100 ml flask, then a solvent mixture of MeOH and  $\text{CHCl}_3$  (30 ml, V:V=1:2) was added. The mixture was refluxed for 12 h. After cooled to ambient temperature, excess bistrifluoromethanesulfonimide lithium salt ( $\text{LiNTf}_2$ ) in MeOH was added to get a faint yellow precipitate, which was filtered and washed with MeOH to generate a faint yellow solid: 8 mg, 85.6%. The composition of **SB** is a mixture of **Zn<sub>16</sub>LB<sub>8</sub>**, **Zn<sub>18</sub>LB<sub>9</sub>** and **Zn<sub>20</sub>LB<sub>10</sub>**.  $^1\text{H}$  NMR (400 MHz,  $\text{CD}_3\text{CN}$ )  $\delta$  9.25-8.96 (d,  $J = 116$  Hz, 8H,  $^{\text{A, B}}$ -tpy- $\text{H}^{3,5'}$ ), 8.80-8.50 (m, 10H,  $^{\text{A, B}}$ -tpy- $\text{H}^{3,3''}$ ,  $\text{H}^{\text{i}}$ ), 8.49-8.32 (m, 10H,  $\text{H}^{\text{j}}$ ,  $\text{H}^{\text{p}}$ ), 8.31-8.09 (m, 10H,  $\text{H}^{\text{k}}$ ,  $\text{H}^{\text{g}}$ ), 8.08-7.95 (m, 2H,  $\text{H}^{\text{n}}$ ), 7.71-7.30 (m, 18H,  $^{\text{A, B}}$ -tpy- $\text{H}^{4,4''}$ ,  $^{6,6''}$ ,  $\text{H}^{\text{m}}$ ), 1.92-1.79 (m, 12H,  $^{\text{A, B}}$ -tpy- $\text{H}^{\text{Me}}$ ). **Zn<sub>16</sub>LB<sub>8</sub>**. ESI-MS ( $m/z$ ): 1989.0968 [ $\text{M}-10\text{NTf}_2^-$ ] $^{10+}$  (calcd  $m/z$ : 1988.9400), 1782.6381 [ $\text{M}-11\text{NTf}_2^-$ ] $^{11+}$  (calcd  $m/z$ : 1782.6600), 1610.7992 [ $\text{M}-12\text{NTf}_2^-$ ] $^{12+}$  (calcd  $m/z$ : 1610.7600), 1465.181 [ $\text{M}-13\text{NTf}_2^-$ ] $^{13+}$  (calcd  $m/z$ : 1465.3062), 1340.4917 [ $\text{M}-14\text{NTf}_2^-$ ] $^{14+}$  (calcd  $m/z$ : 1340.6314), 1232.4807 [ $\text{M}-15\text{NTf}_2^-$ ] $^{15+}$  (calcd  $m/z$ : 1232.5800), 1137.9879 [ $\text{M}-16\text{NTf}_2^-$ ] $^{16+}$  (calcd  $m/z$ : 1138.0350), 1054.4823 [ $\text{M}-17\text{NTf}_2^-$ ] $^{17+}$  (calcd  $m/z$ : 1054.6129), 980.5468 [ $\text{M}-17\text{NTf}_2^-$ ] $^{17+}$  (calcd  $m/z$ : 980.4600). **Zn<sub>18</sub>LB<sub>9</sub>**. ESI-MS ( $m/z$ ): 2040.8651 [ $\text{M}-11\text{NTf}_2^-$ ] $^{11+}$  (calcd  $m/z$ : 2040.5100), 1847.2660 [ $\text{M}-12\text{NTf}_2^-$ ] $^{12+}$  (calcd  $m/z$ : 1847.1225), 1683.7830 [ $\text{M}-13\text{NTf}_2^-$ ] $^{13+}$  (calcd  $m/z$ : 1683.4869), 1543.1353 [ $\text{M}-14\text{NTf}_2^-$ ] $^{14+}$  (calcd  $m/z$ : 1543.2279), 1421.6132 [ $\text{M}-15\text{NTf}_2^-$ ] $^{15+}$  (calcd  $m/z$ : 1421.6700), 1315.1100 [ $\text{M}-16\text{NTf}_2^-$ ] $^{16+}$  (calcd  $m/z$ : 1315.3069), 1221.5123 [ $\text{M}-17\text{NTf}_2^-$ ] $^{17+}$  (calcd  $m/z$ : 1221.4571), 1137.9879 [ $\text{M}-18\text{NTf}_2^-$ ] $^{18+}$  (calcd  $m/z$ : 1138.0350), 1063.0372 [ $\text{M}-19\text{NTf}_2^-$ ] $^{19+}$  (calcd  $m/z$ : 1063.3942), 996.0065 [ $\text{M}-20\text{NTf}_2^-$ ] $^{20+}$  (calcd  $m/z$ : 996.2175). **Zn<sub>20</sub>LB<sub>10</sub>**. ESI-MS ( $m/z$ ): 2083.8386 [ $\text{M}-12\text{NTf}_2^-$ ] $^{12+}$  (calcd  $m/z$ : 2083.4850), 1901.8301 [ $\text{M}-13\text{NTf}_2^-$ ] $^{13+}$  (calcd  $m/z$ : 1901.6677), 1745.5701 [ $\text{M}-14\text{NTf}_2^-$ ] $^{14+}$  (calcd  $m/z$ : 1745.8243), 1610.7992 [ $\text{M}-15\text{NTf}_2^-$ ] $^{15+}$  (calcd  $m/z$ : 1610.7600), 1492.6056 [ $\text{M}-16\text{NTf}_2^-$ ] $^{16+}$  (calcd  $m/z$ : 1492.5788), 1388.5630 [ $\text{M}-17\text{NTf}_2^-$ ] $^{17+}$  (calcd  $m/z$ : 1388.3012), 1295.5450 [ $\text{M}-18\text{NTf}_2^-$ ] $^{18+}$  (calcd  $m/z$ : 1295.6100), 1212.4930 [ $\text{M}-19\text{NTf}_2^-$ ] $^{19+}$  (calcd  $m/z$ : 1212.6758), 1137.9879 [ $\text{M}-20\text{NTf}_2^-$ ] $^{20+}$  (calcd  $m/z$ : 1138.0350), 1070.0546 [ $\text{M}-21\text{NTf}_2^-$ ] $^{21+}$  (calcd  $m/z$ : 1070.5029), 1009.0050 [ $\text{M}-22\text{NTf}_2^-$ ] $^{22+}$  (calcd  $m/z$ : 1009.1100).

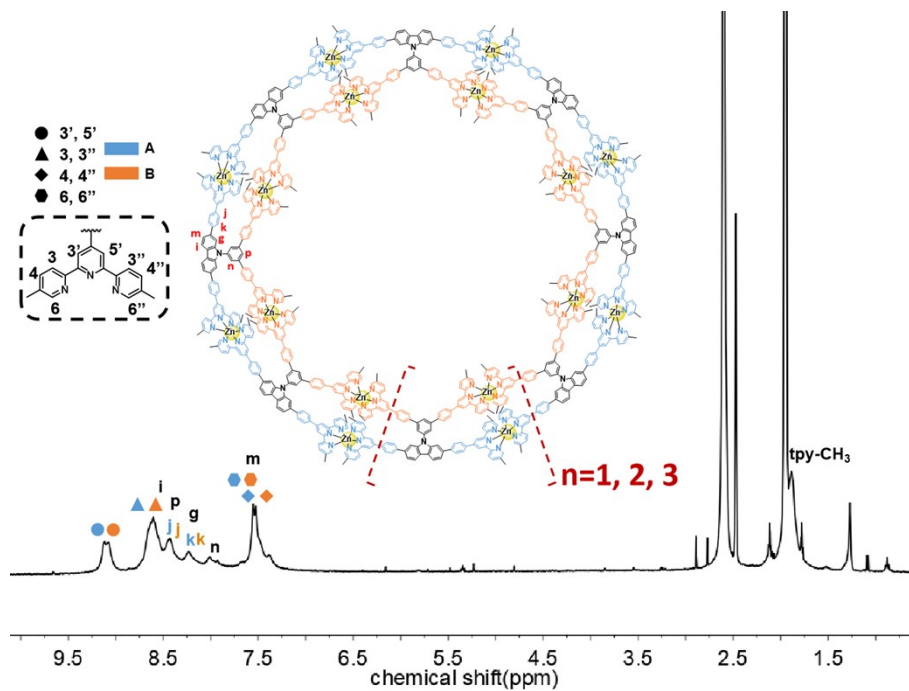

**Figure S12.**  $^1\text{H}$  NMR spectrum (400 MHz) of supramolecular macrocycles **SB** in  $\text{DMSO-d}_6/\text{CD}_3\text{CN}$  (1:9).

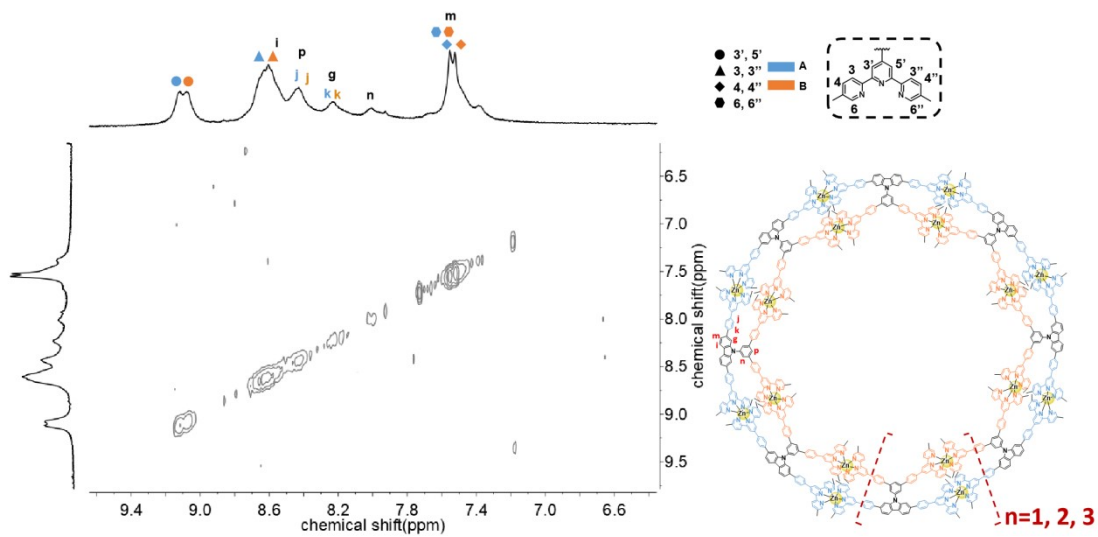

**Figure S13.** 2D COSY NMR spectrum (400 MHz) of supramolecular macrocycles **SB** in  $\text{DMSO-d}_6/\text{CD}_3\text{CN}$  (1:9).

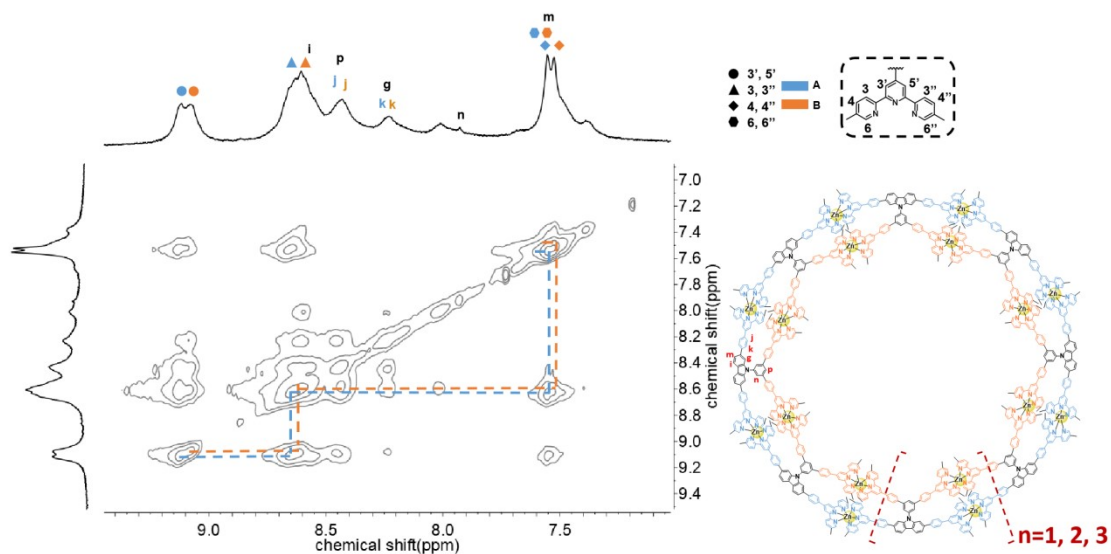

**Figure S14.** 2D NOESY NMR spectrum (400 MHz) of supramolecular macrocycles **SB** in DMSO- $d_6$ /CD $_3$ CN (1:9).

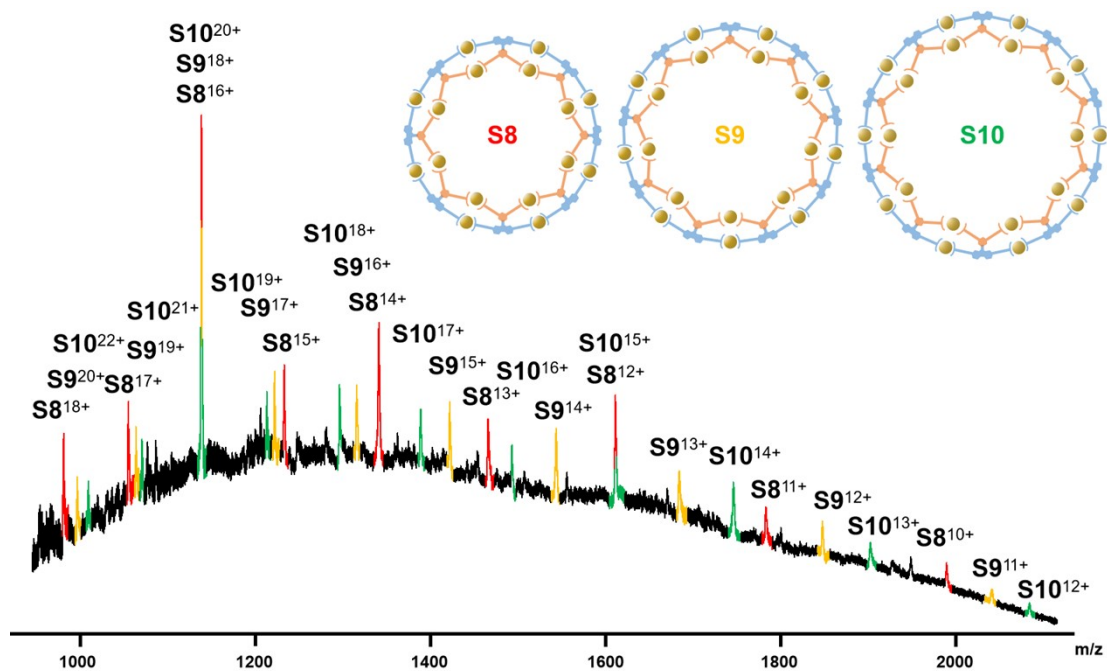

**Figure S15.** ESI-MS spectrum of supramolecular macrocycles **SB** (NTf $_2^-$  as counterion).

SB-Zn

0.5 mg/mL

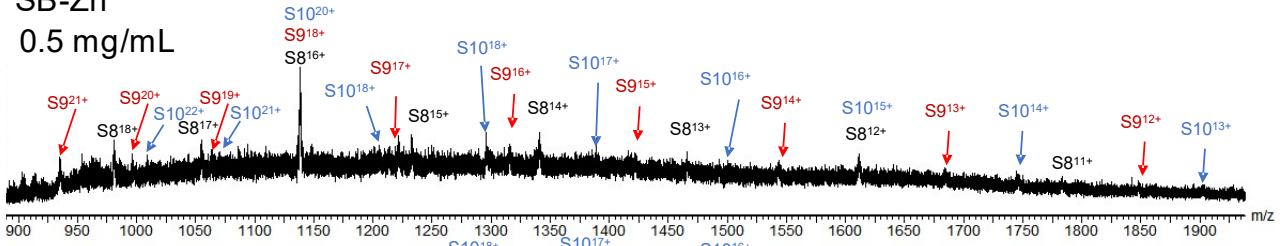

1 mg/mL

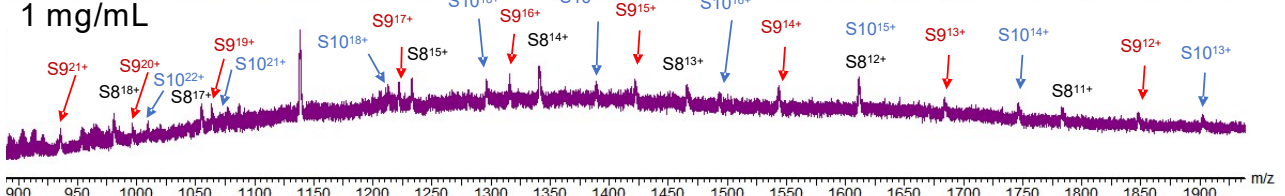

2 mg/mL

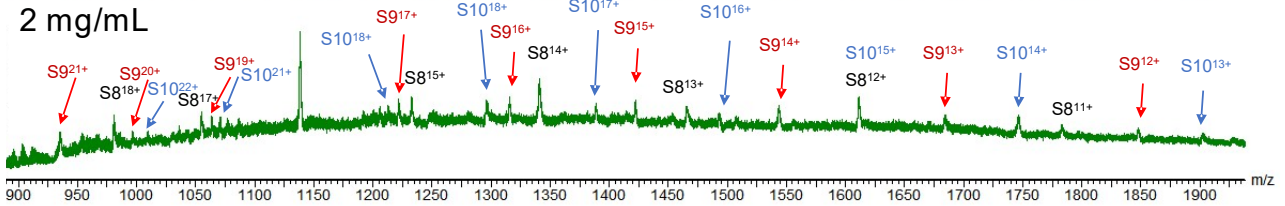

5 mg/mL

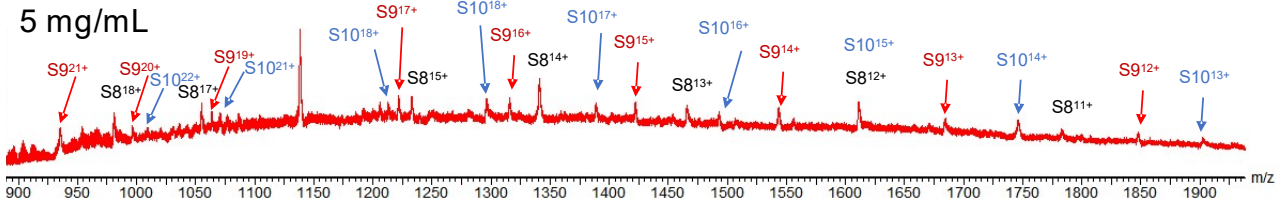

Figure S16. ESI-MS spectrum of the SB-Zn with concentration ranging from 0.5 mg/mL to 5 mg/mL.

## 6. $^1\text{H}$ NMR, $^{13}\text{C}$ NMR, COSY and NOESY NMR spectra of other compounds

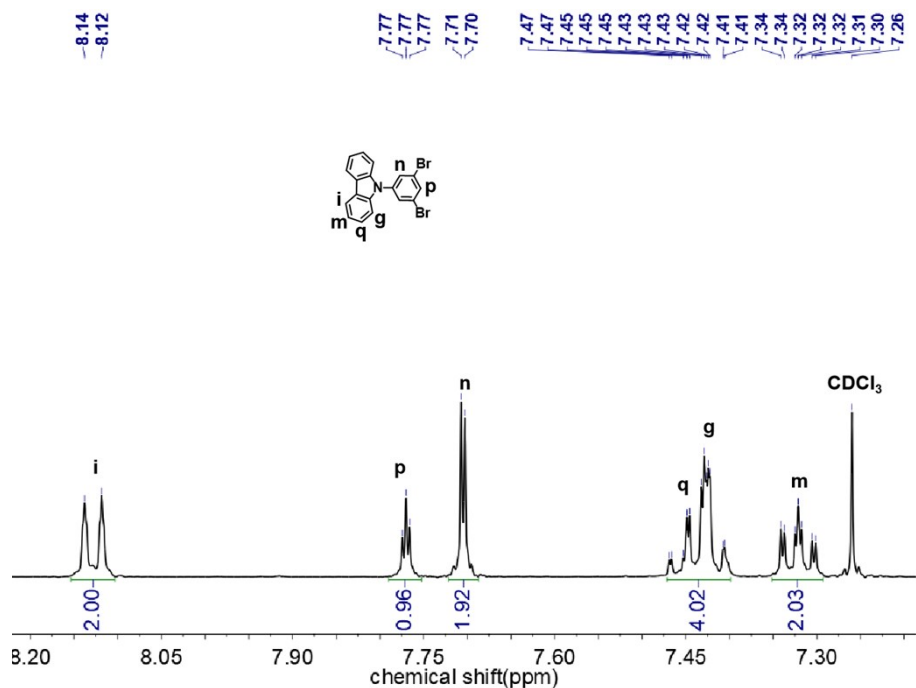

Figure S17.  $^1\text{H}$  NMR spectrum (400 MHz) of Compound S1 in  $\text{CDCl}_3$ .

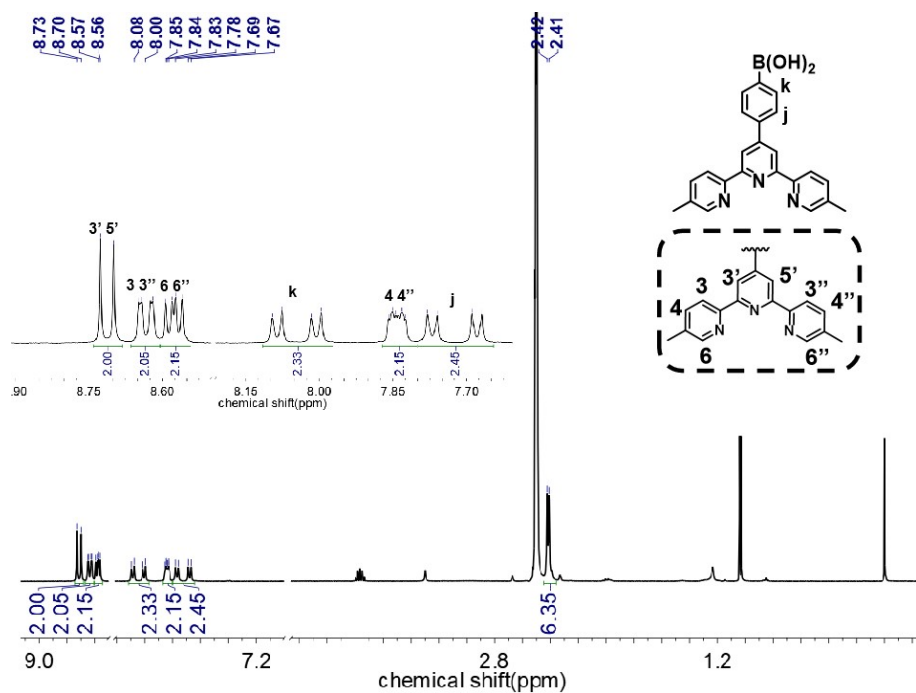

Figure S18.  $^1\text{H}$  NMR spectrum (400 MHz) of S2 in  $\text{CD}_3\text{OD}$ .

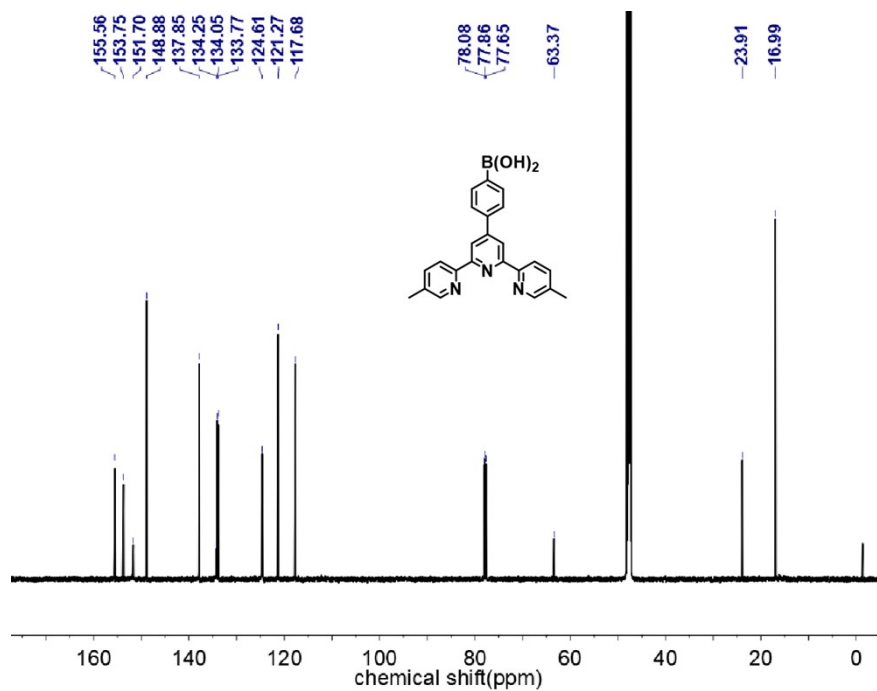

Figure S19. <sup>13</sup>C NMR spectrum (101 MHz) of S2 in CD<sub>3</sub>OD.

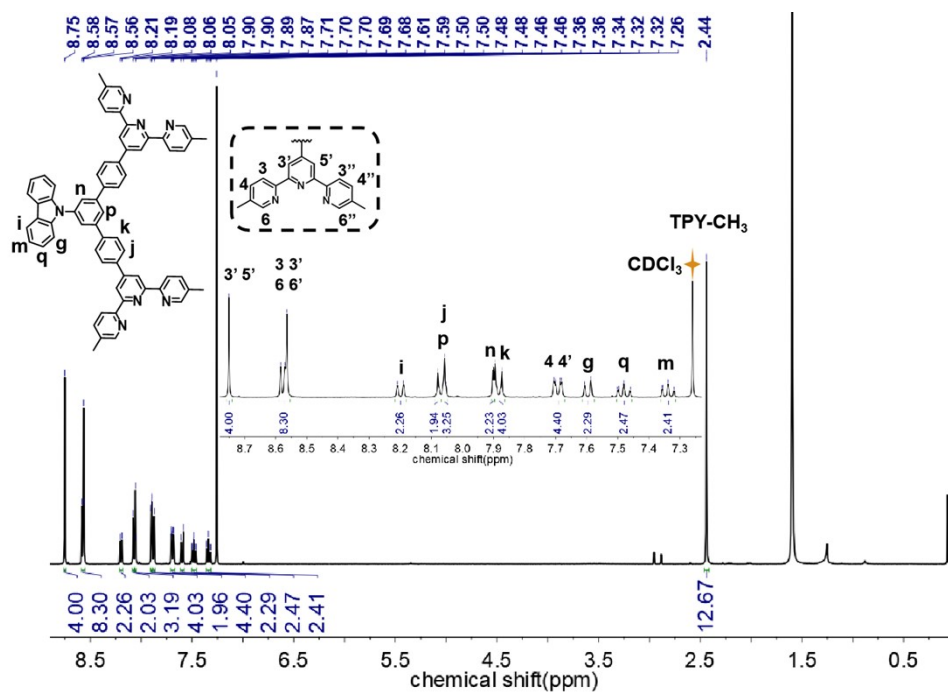

Figure S20. <sup>1</sup>H NMR spectrum (400 MHz) of Ligand 1 in CDCl<sub>3</sub>.

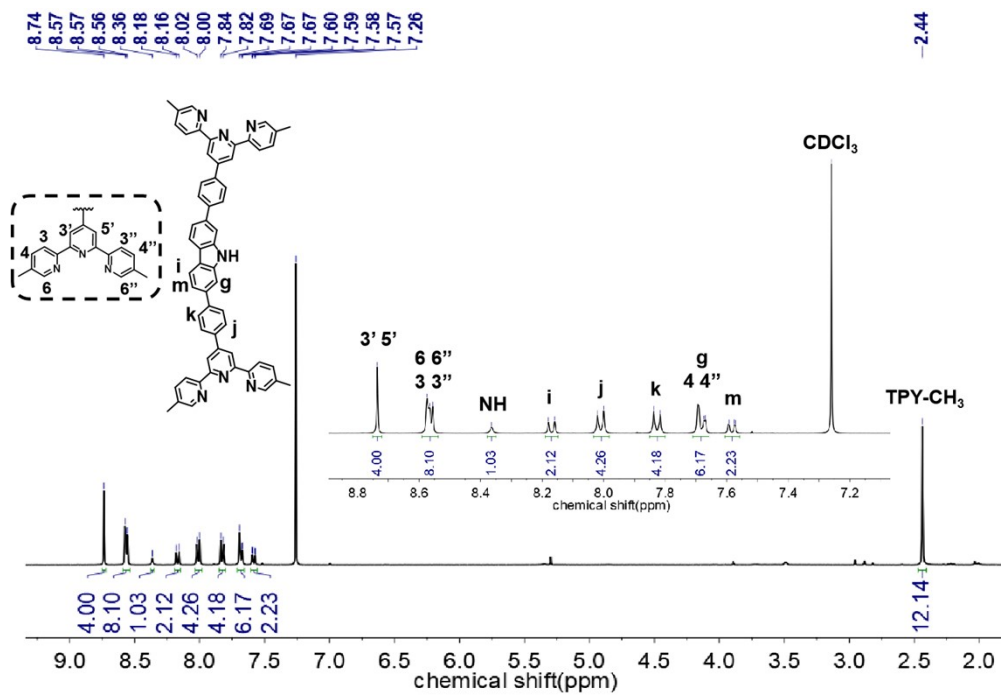

Figure S21. <sup>1</sup>H NMR spectrum (400 MHz) of Compound S3 in CDCl<sub>3</sub>.

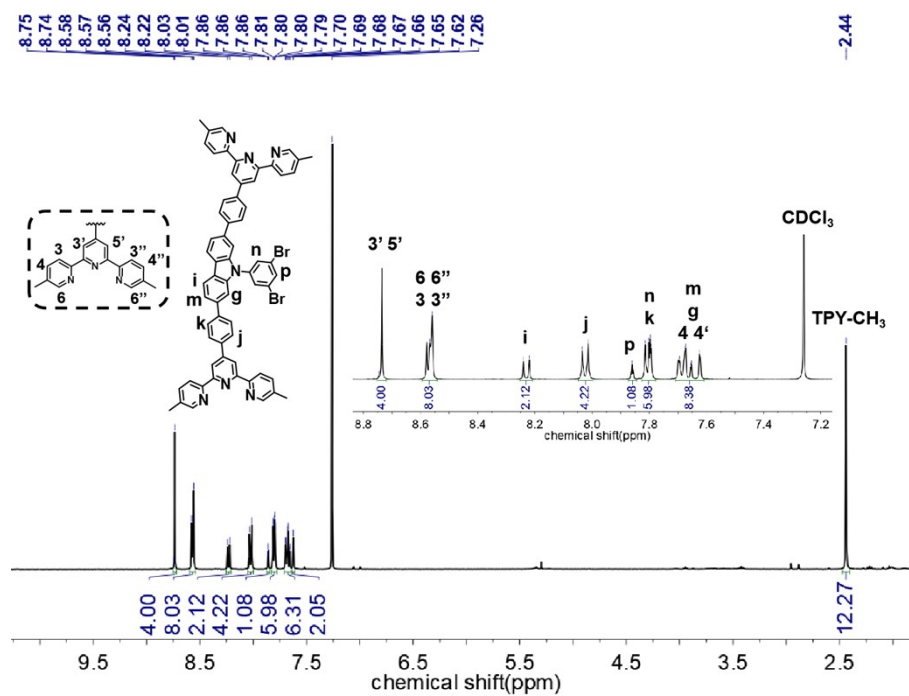

Figure S22. <sup>1</sup>H NMR spectrum (400 MHz) of Ligand 3 in CDCl<sub>3</sub>.



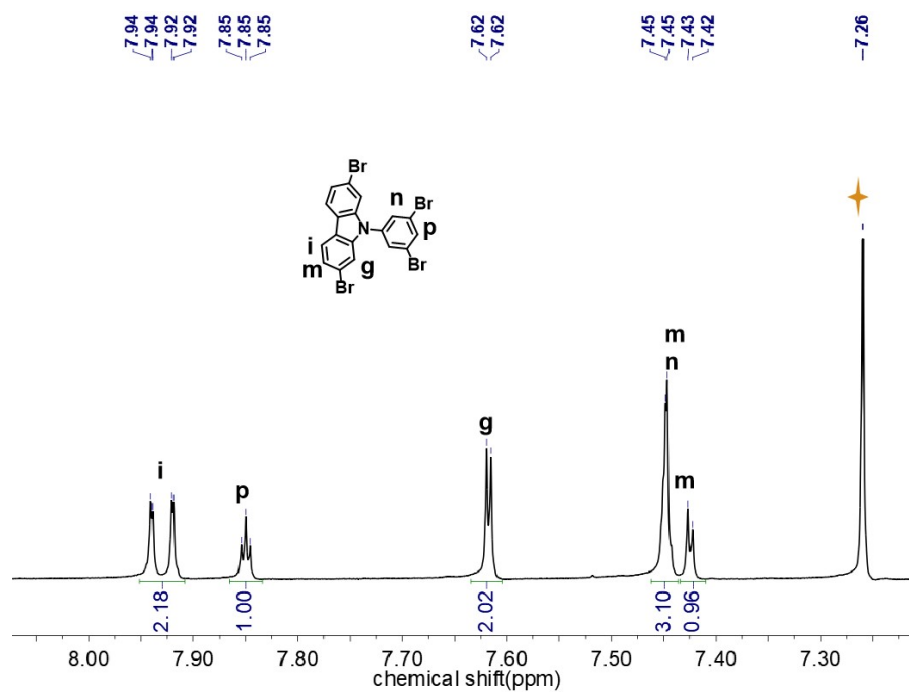

Figure S23.  $^1\text{H}$  NMR spectrum (400 MHz) of **5** in  $\text{CDCl}_3$ .

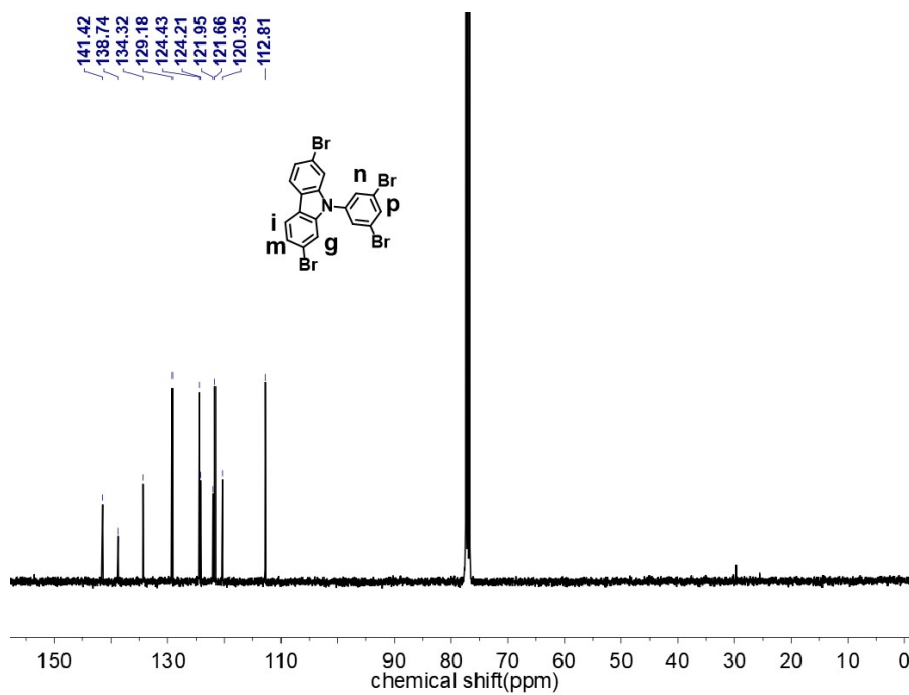

Figure S24.  $^{13}\text{C}$  NMR spectrum (101 MHz) of **5** in  $\text{CDCl}_3$ .

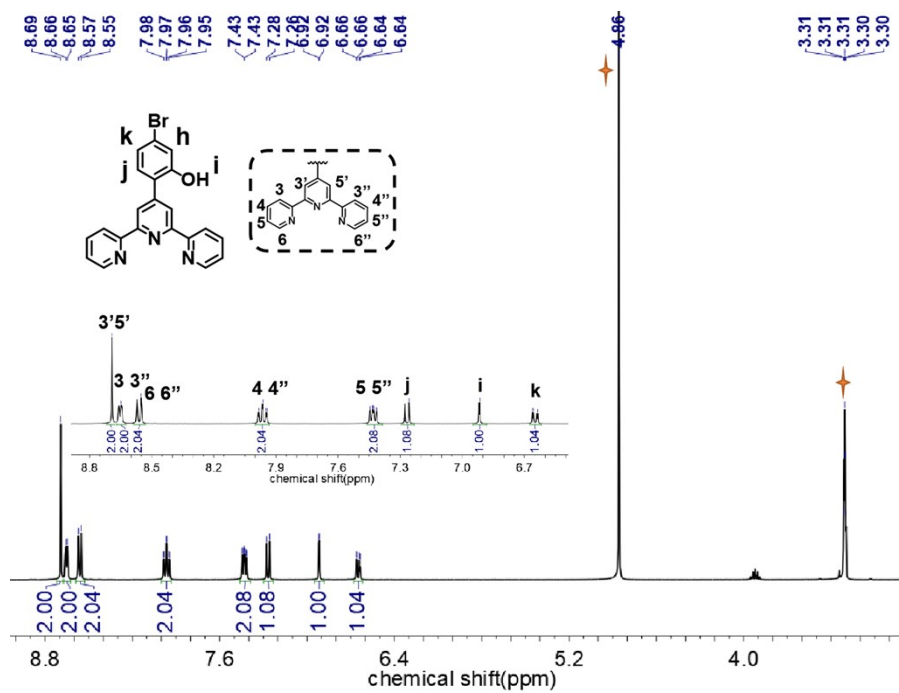

Figure S25. <sup>1</sup>H NMR spectrum (400 MHz) of S5 in CD<sub>3</sub>OD.

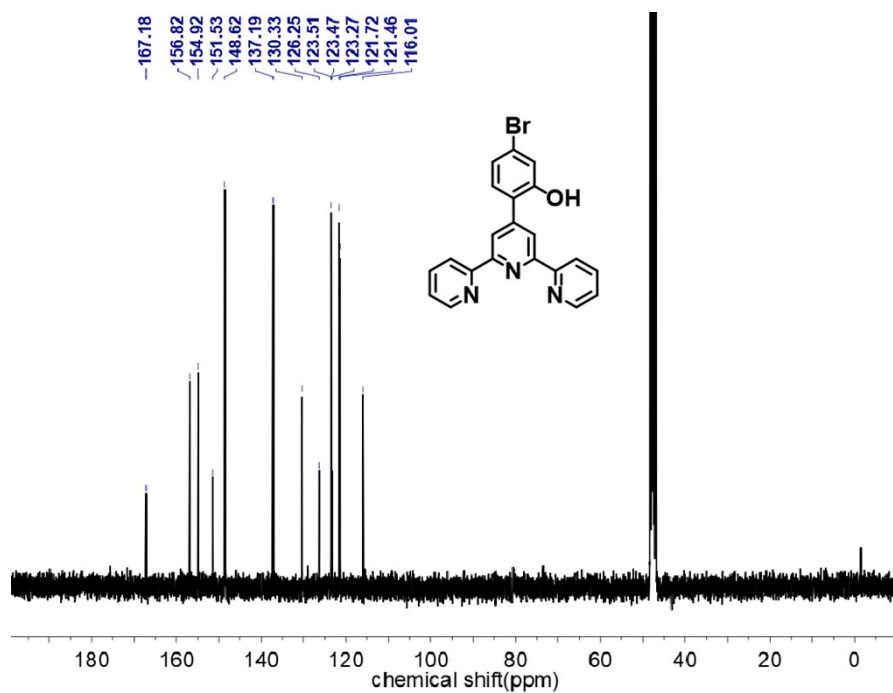

Figure S26. <sup>13</sup>C NMR spectrum (101 MHz) of S5 in CD<sub>3</sub>OD.

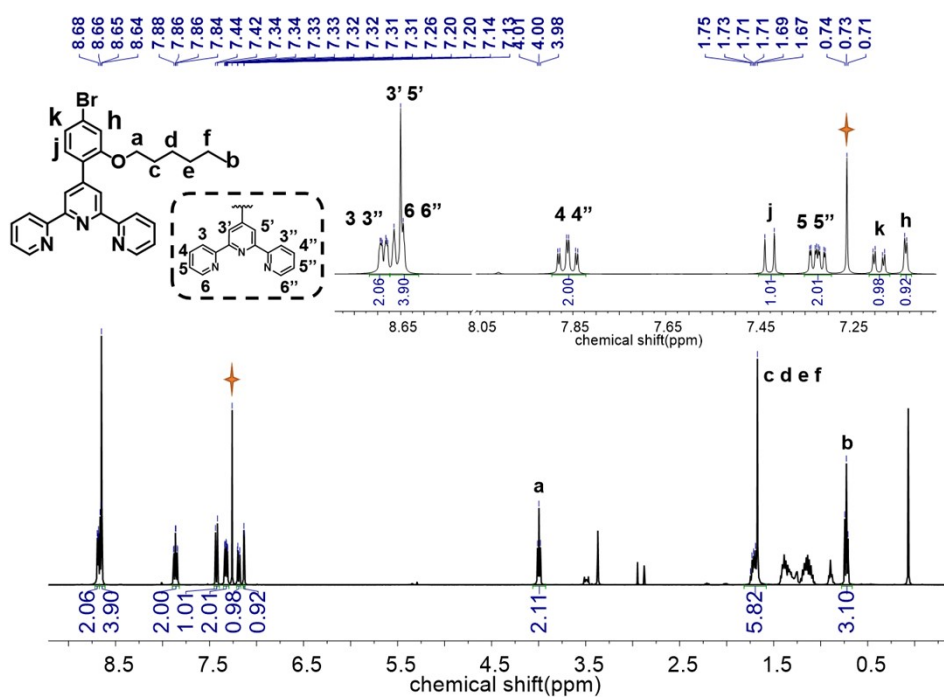

Figure S27. <sup>1</sup>H NMR spectrum (400 MHz) of **S6** in CDCl<sub>3</sub>.

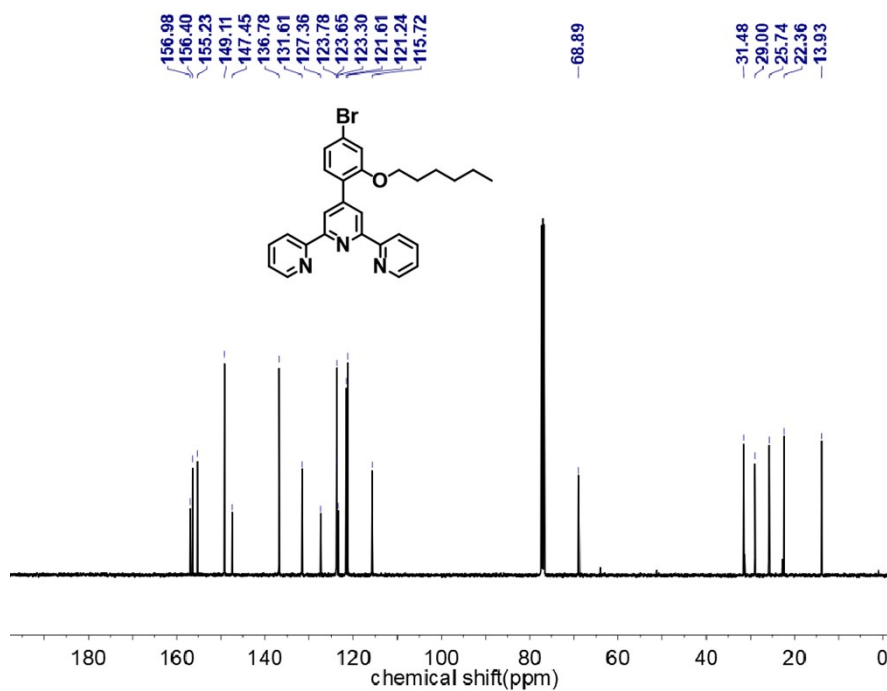

Figure S28. <sup>13</sup>C NMR spectrum (101 MHz) of **S6** in CDCl<sub>3</sub>.

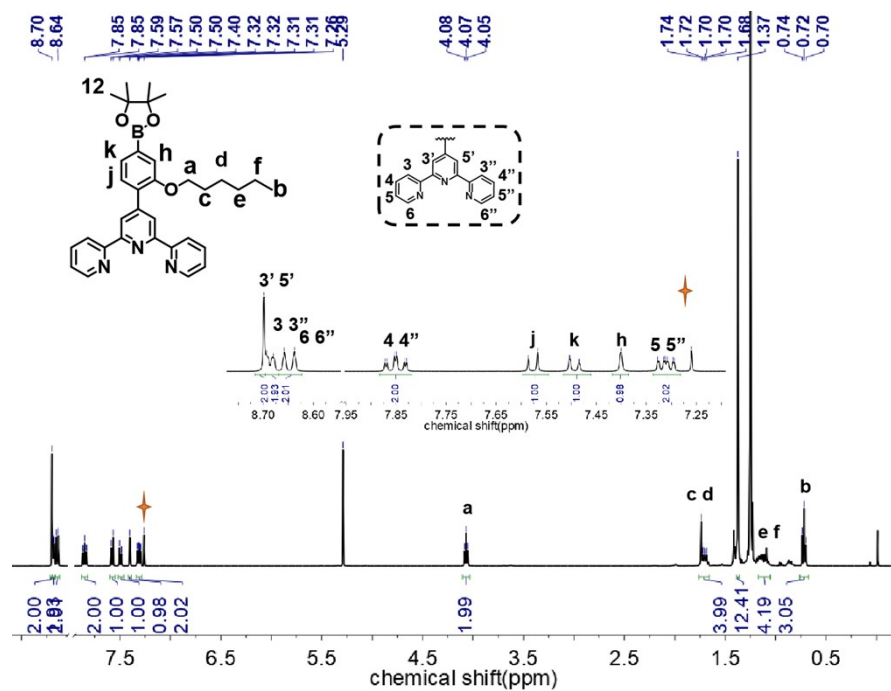

Figure S29. <sup>1</sup>H NMR spectrum (400 MHz) of S7 in CDCl<sub>3</sub>.

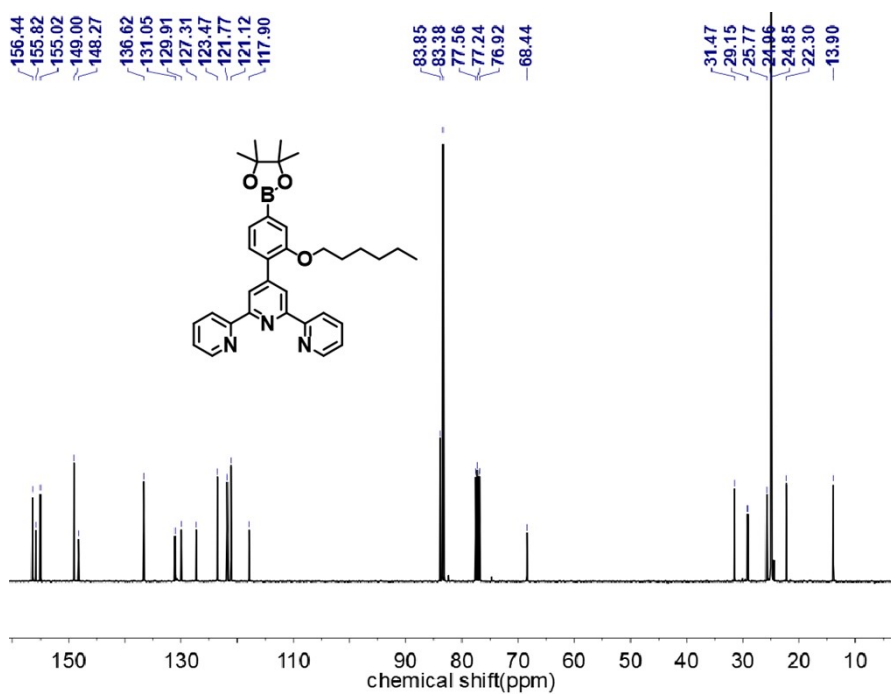

Figure S30. <sup>13</sup>C NMR spectrum (101 MHz) of S7 in CDCl<sub>3</sub>.

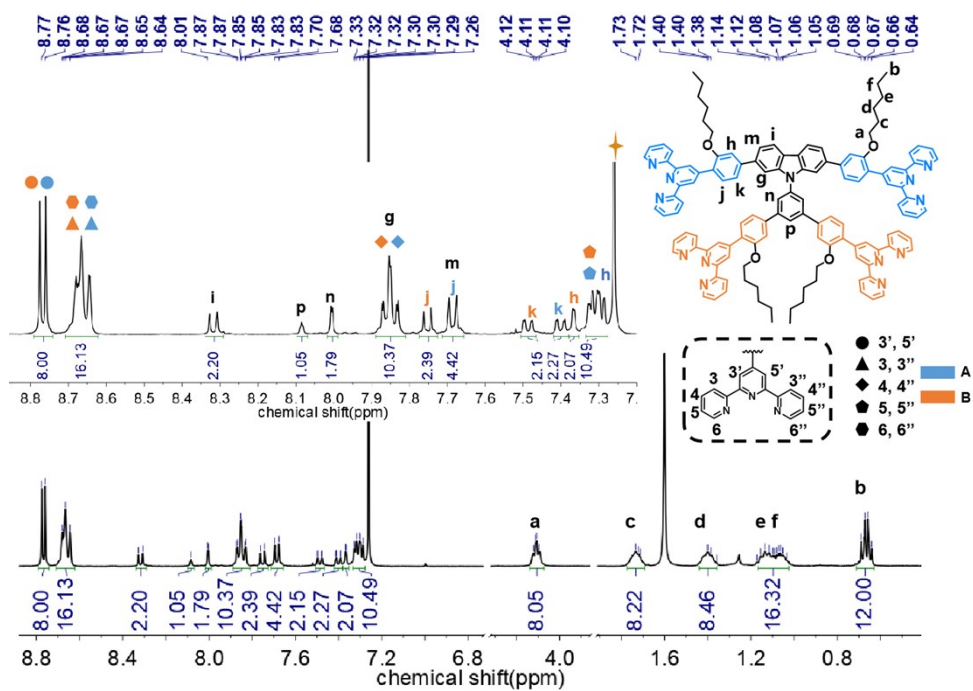

Figure S31.  $^1\text{H}$  NMR spectrum (400 MHz) of ligand LA in  $\text{CDCl}_3$ .

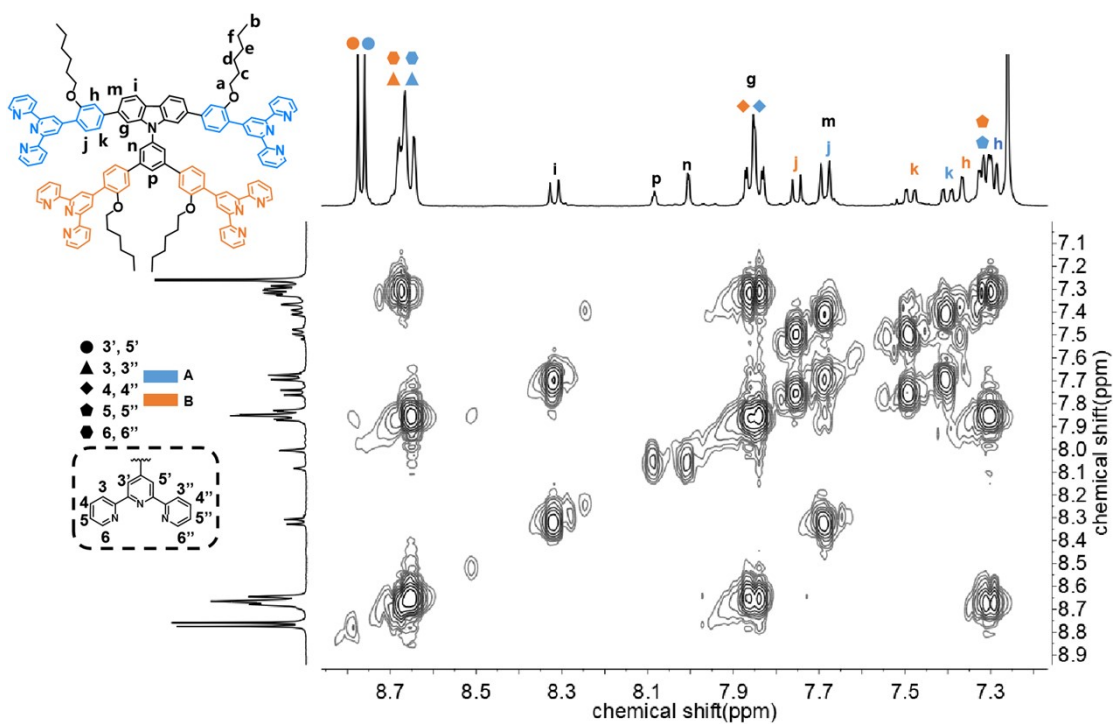

Figure S32. 2D COSY NMR spectrum (400 MHz) of ligand LA in  $\text{CDCl}_3$ .

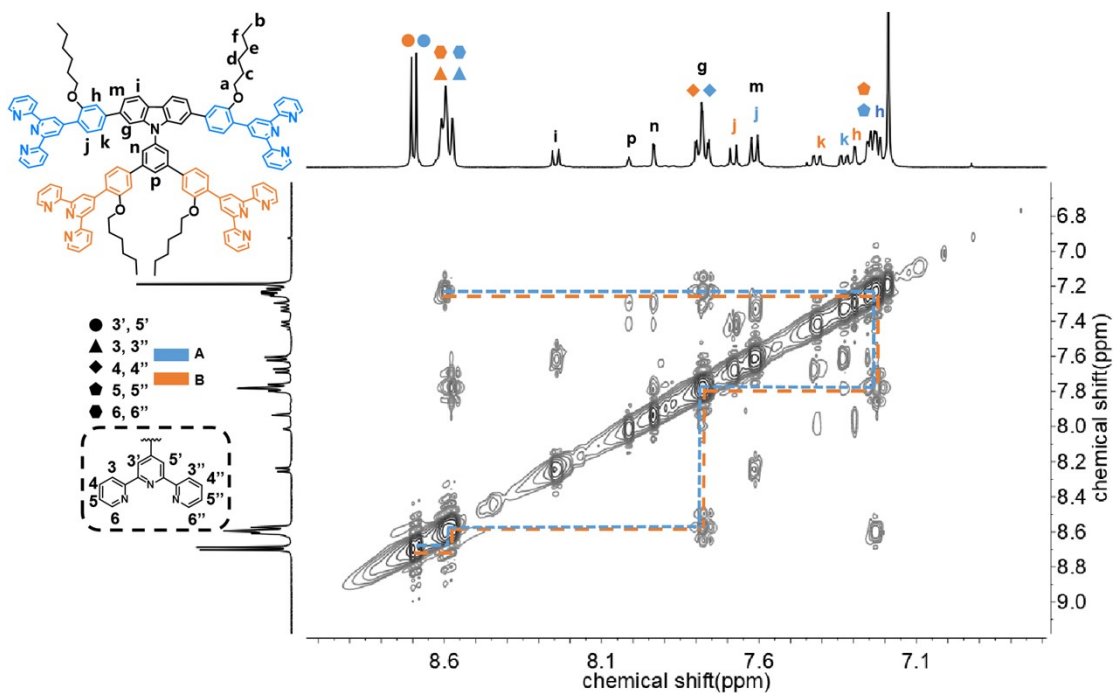

Figure S33. 2D NOESY NMR spectrum (400 MHz) of ligand **LA** in  $\text{CDCl}_3$ .

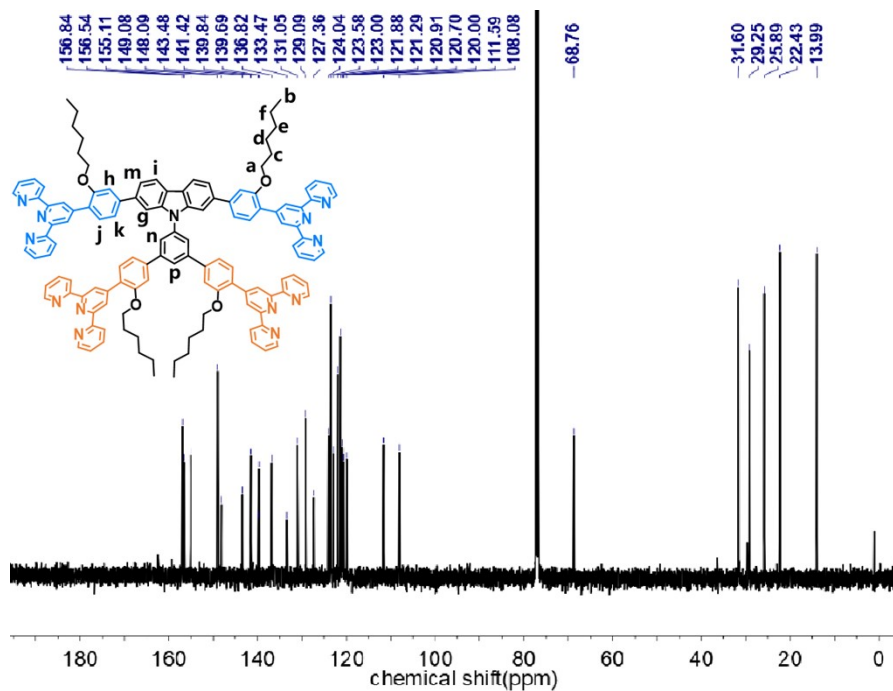

Figure S34.  $^{13}\text{C}$  NMR spectrum (101 MHz) of ligand **LA** in  $\text{CDCl}_3$ .

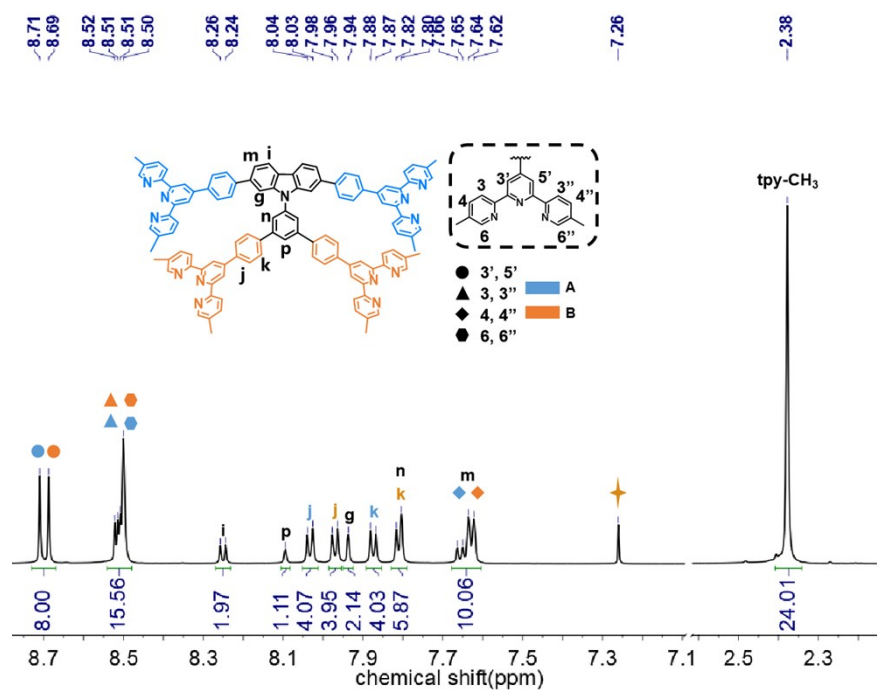

Figure S35. <sup>1</sup>H NMR spectrum (600 MHz) of ligand **LB** in CDCl<sub>3</sub>.

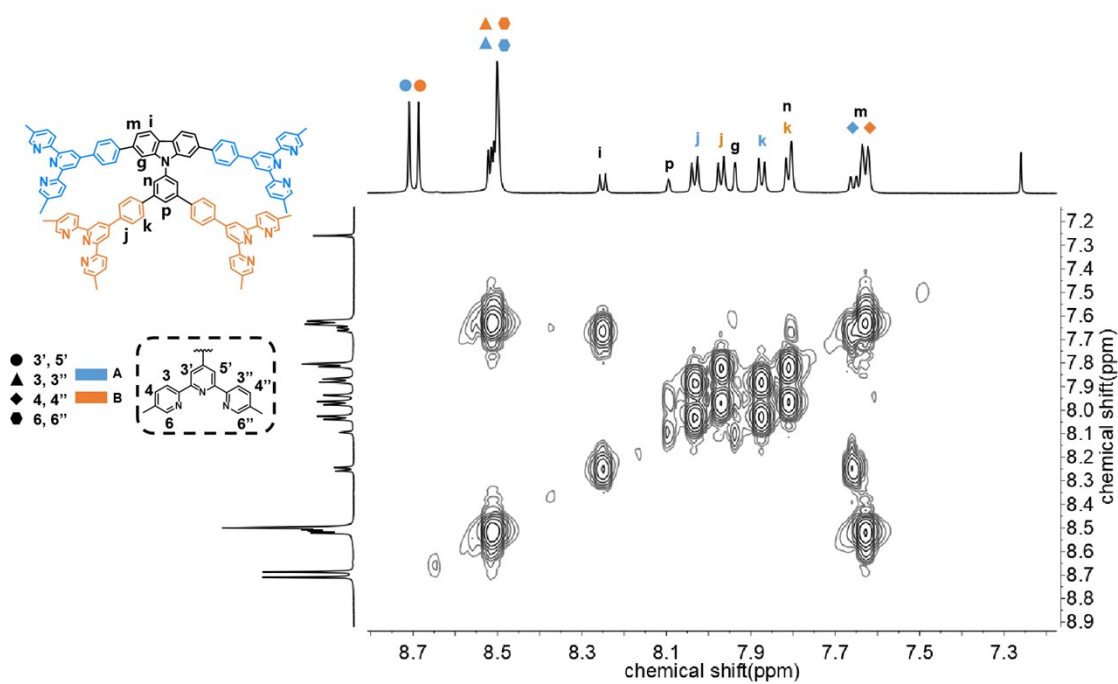

Figure S36. 2D COSY NMR spectrum (600 MHz) of ligand **LB** in CDCl<sub>3</sub>.

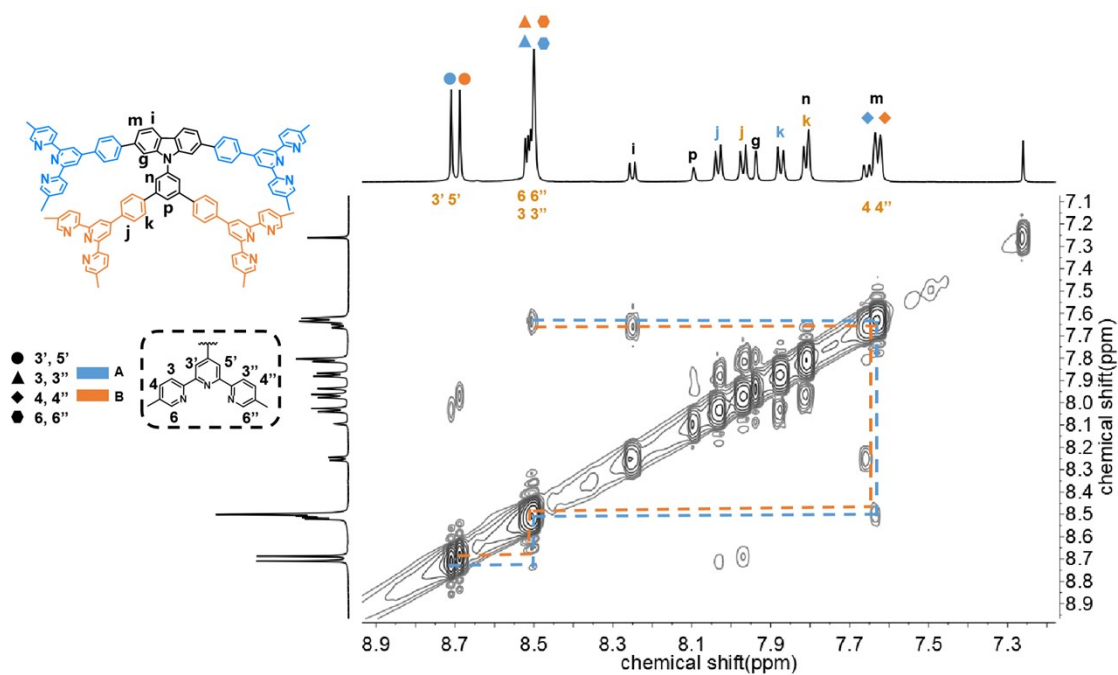

Figure S37. 2D NOESY NMR spectrum (600 MHz) of ligand **LB** in  $\text{CDCl}_3$ .

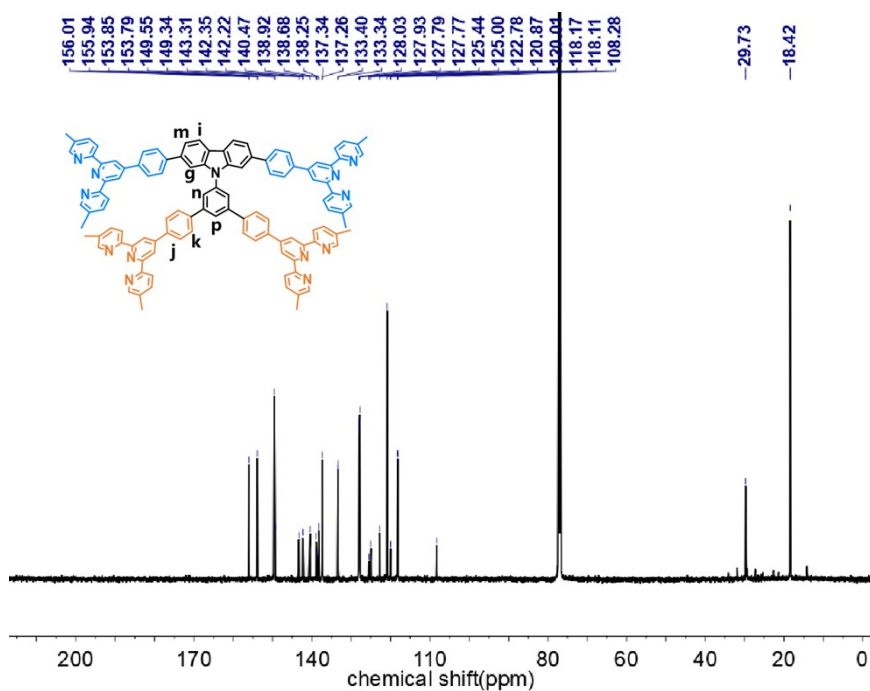

Figure S38.  $^{13}\text{C}$  NMR spectrum (101 MHz) of ligand **LB** in  $\text{CDCl}_3$ .



## 7. ESI-MS spectrum of ligands and other compounds

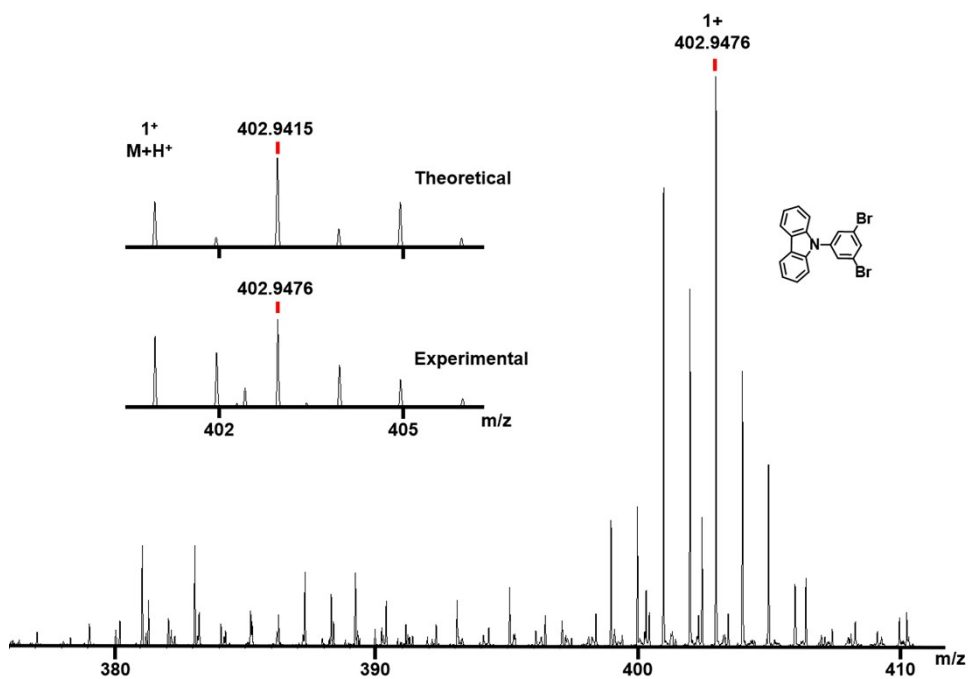

Figure S39. Isotope patterns and ESI-MS spectrum of S1.

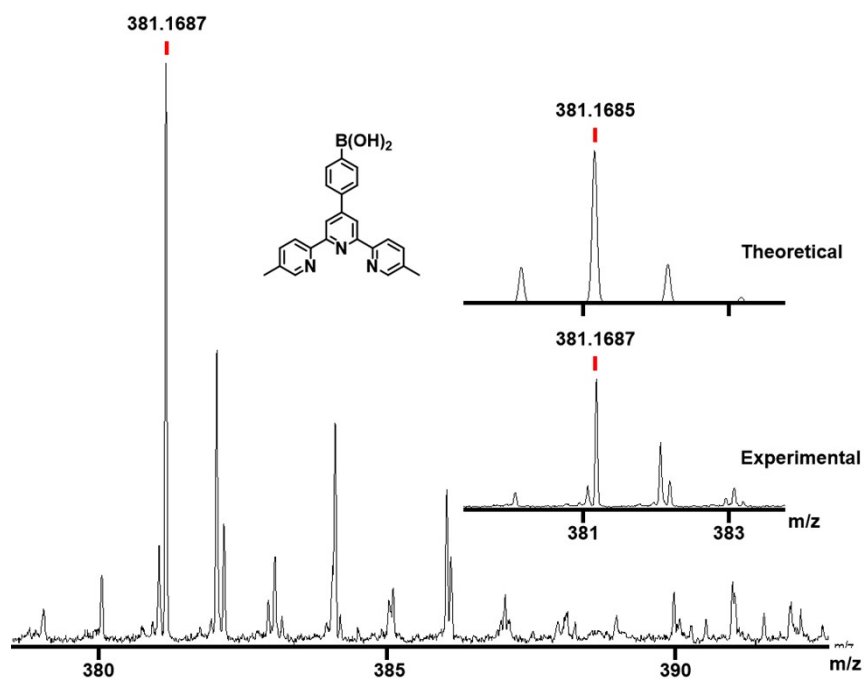

Figure S40. Isotope patterns and ESI-MS spectrum of S2.

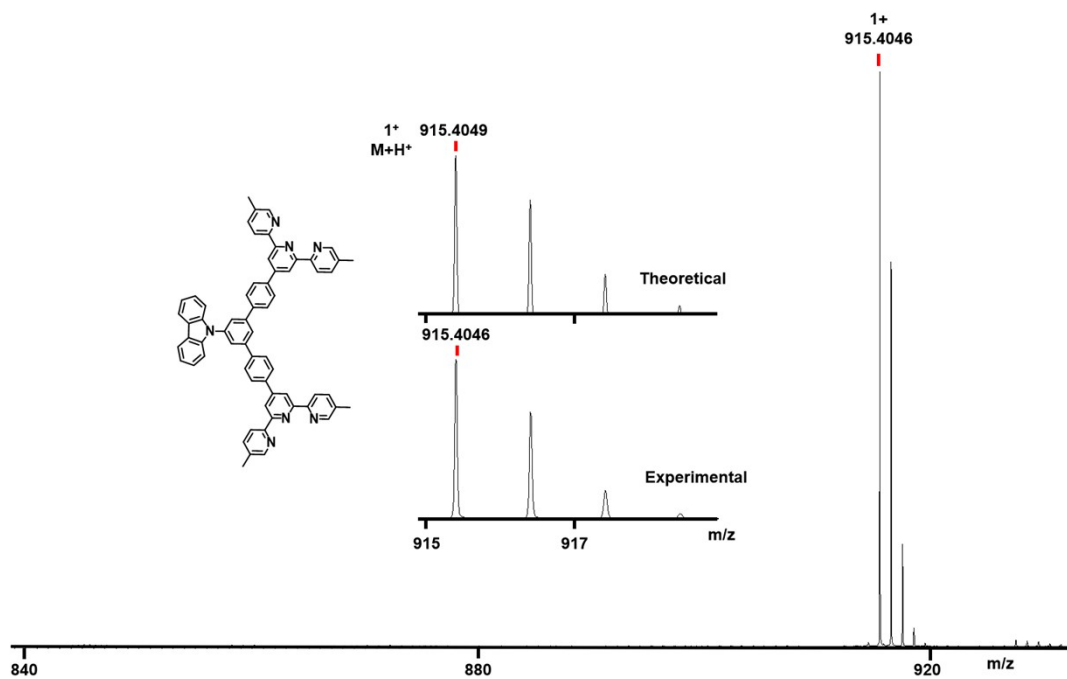

Figure S41. Isotope patterns and ESI-MS spectrum of ligand **1**.

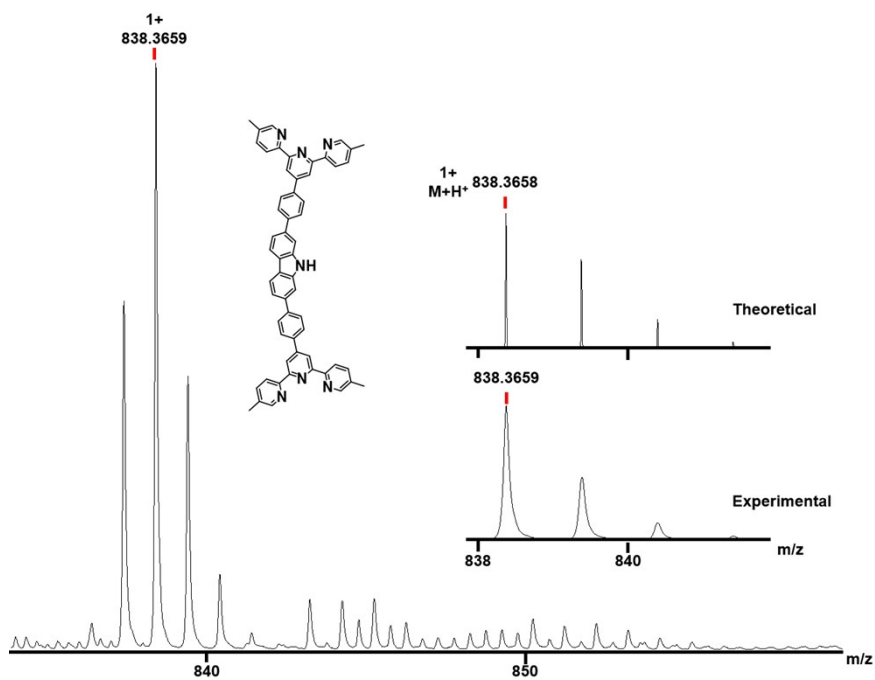

Figure S42. Isotope patterns and ESI-MS spectrum of **S3**.

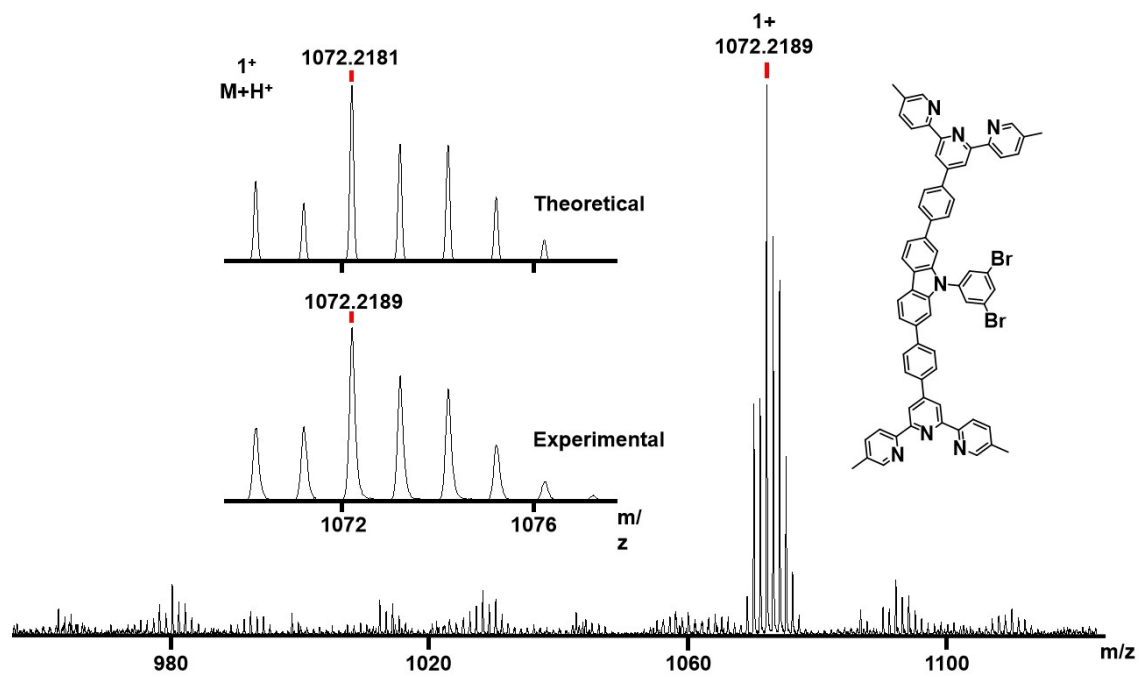

Figure S43. Isotope patterns and ESI-MS spectrum of 3.

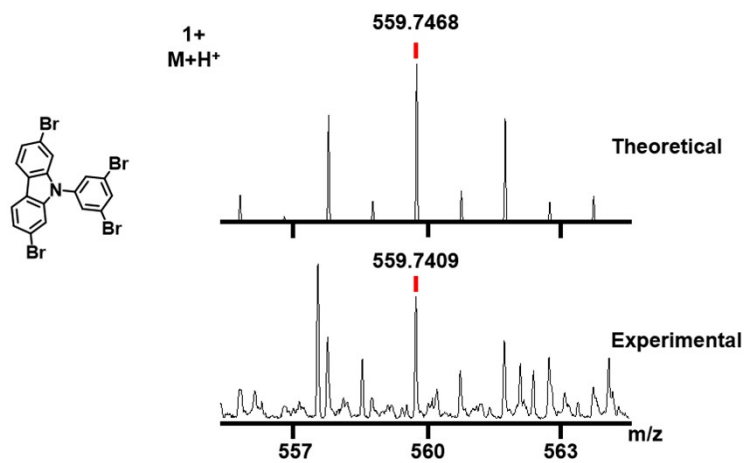

Figure S44. Isotope patterns and ESI-MS spectrum of 5.

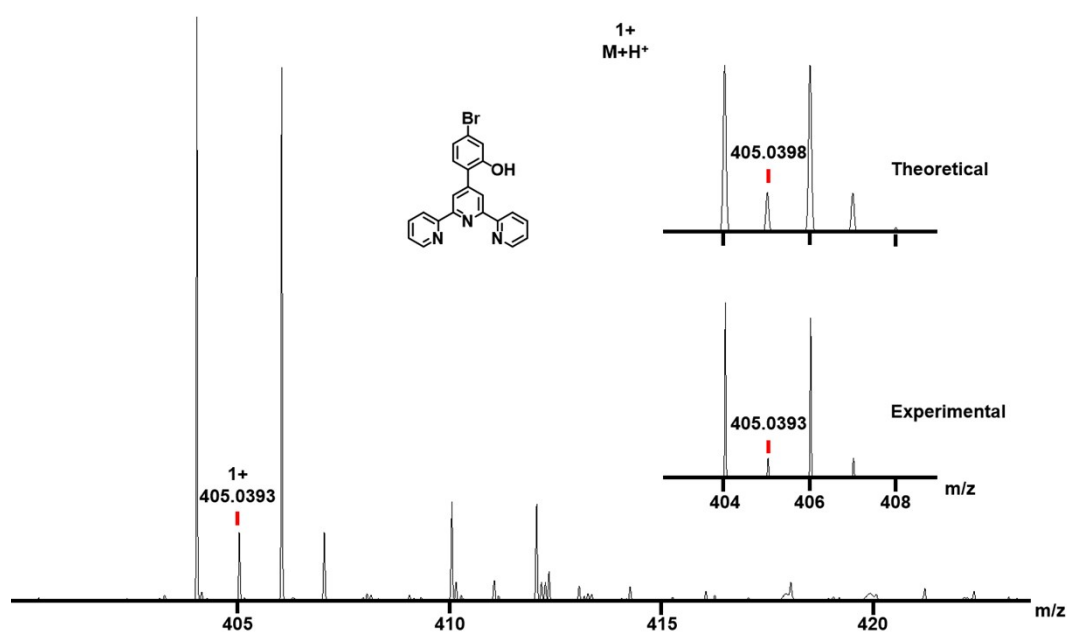

Figure S45. Isotope patterns and ESI-MS spectrum of S5.

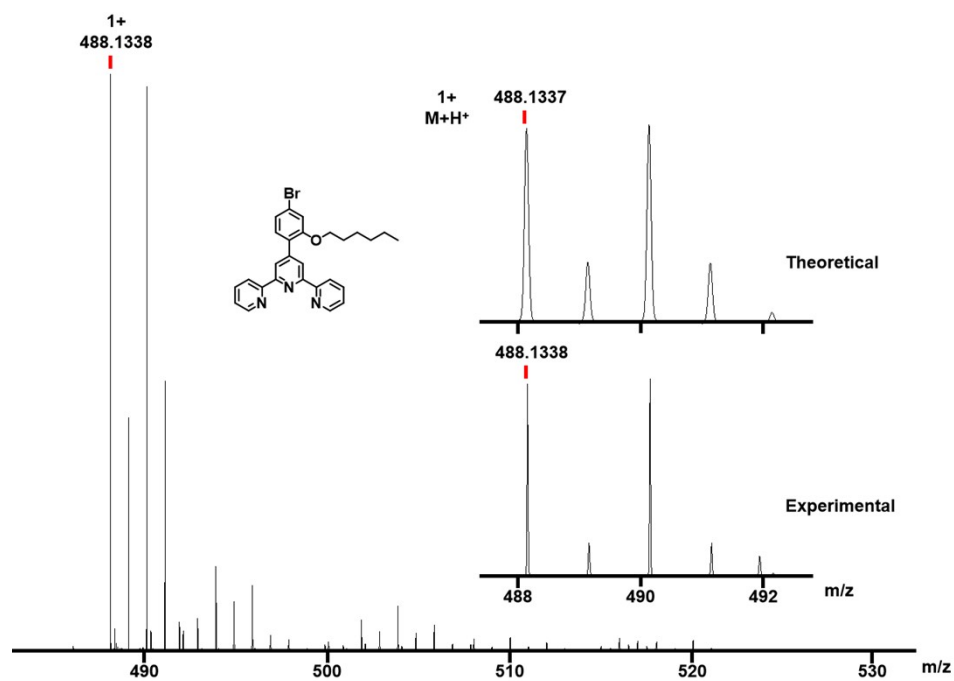

Figure S46. Isotope patterns and ESI-MS spectrum of S6.

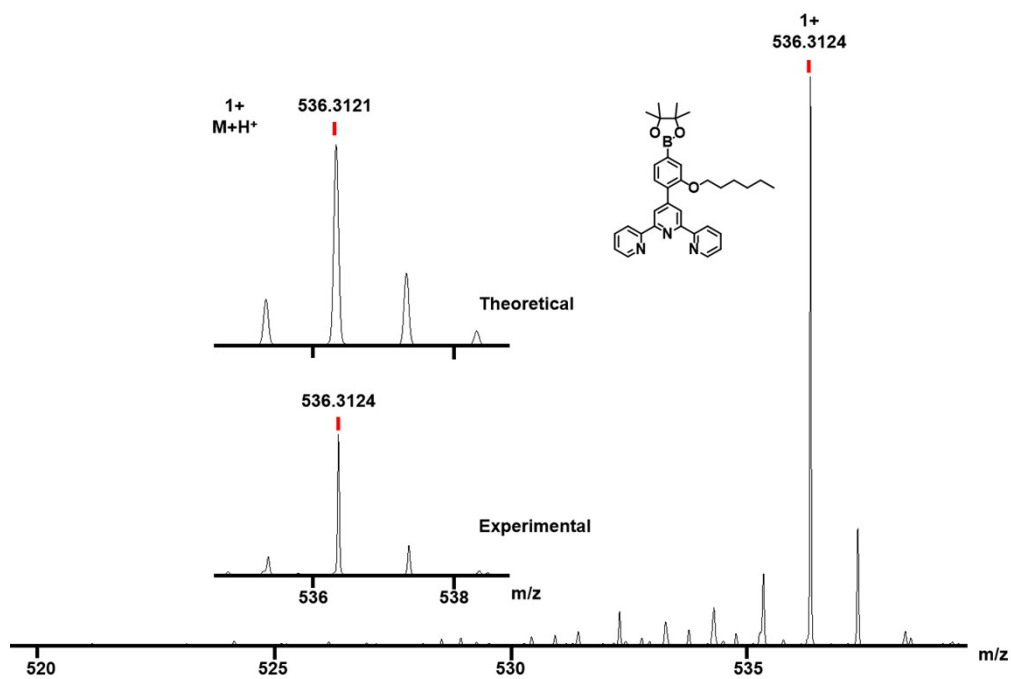

Figure S47. Isotope patterns and ESI-MS spectrum of S7.

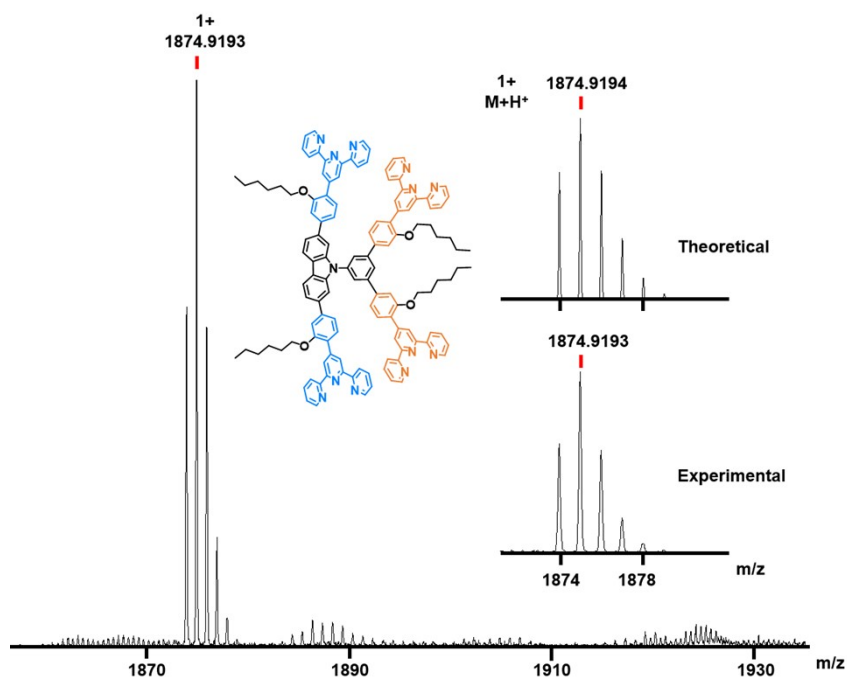

Figure S48. Isotope patterns and ESI-MS spectrum of LA.

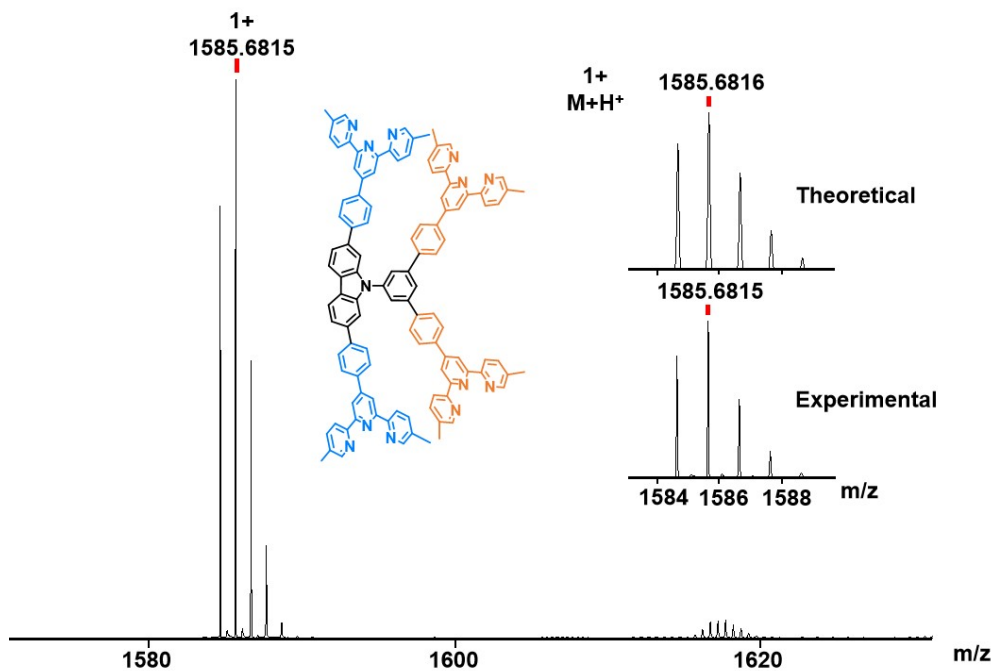

Figure S49. Isotope patterns and ESI-MS spectrum of LB.

## 8. The self-assembly process of ligands LA and LB.

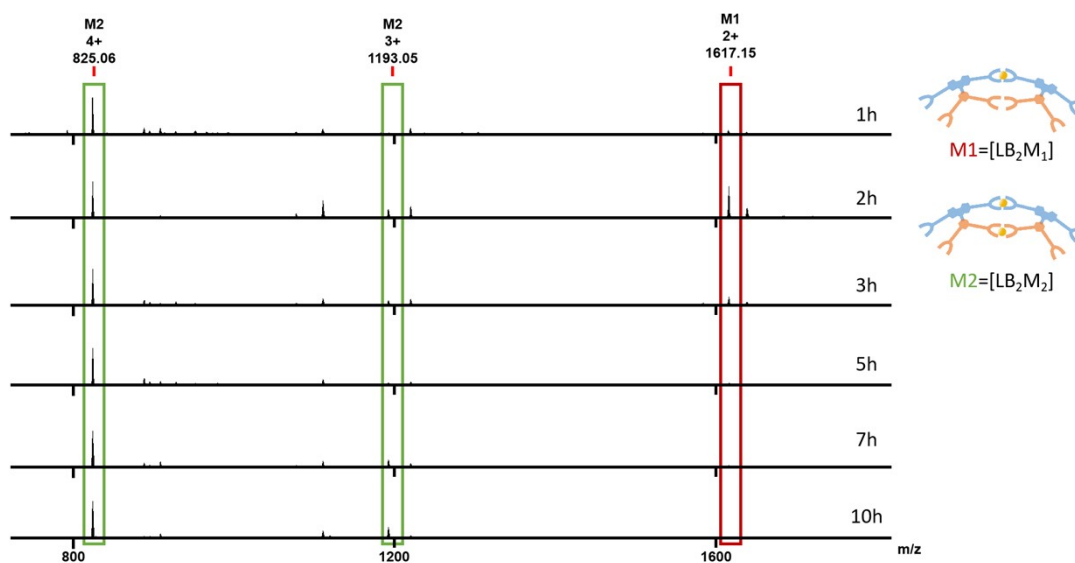

Figure S50. ESI-MS spectrum of self-assembly with LB and  $Zn^{2+}$  in the beginning ( $NTf_2^-$  as counterion).

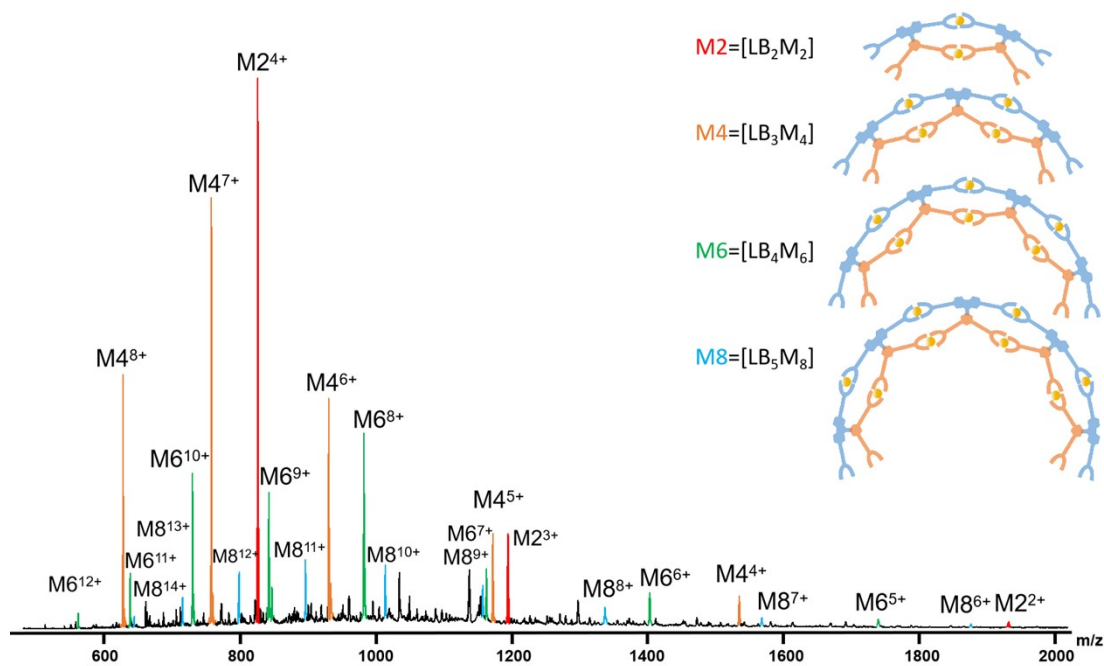

**Figure S51.** ESI-MS spectrum of the intermediates obtained by self-assembly of **LB** with Zn<sup>2+</sup> at a molar ratio of 1:1.5 (NTf<sub>2</sub><sup>-</sup> as counterion).

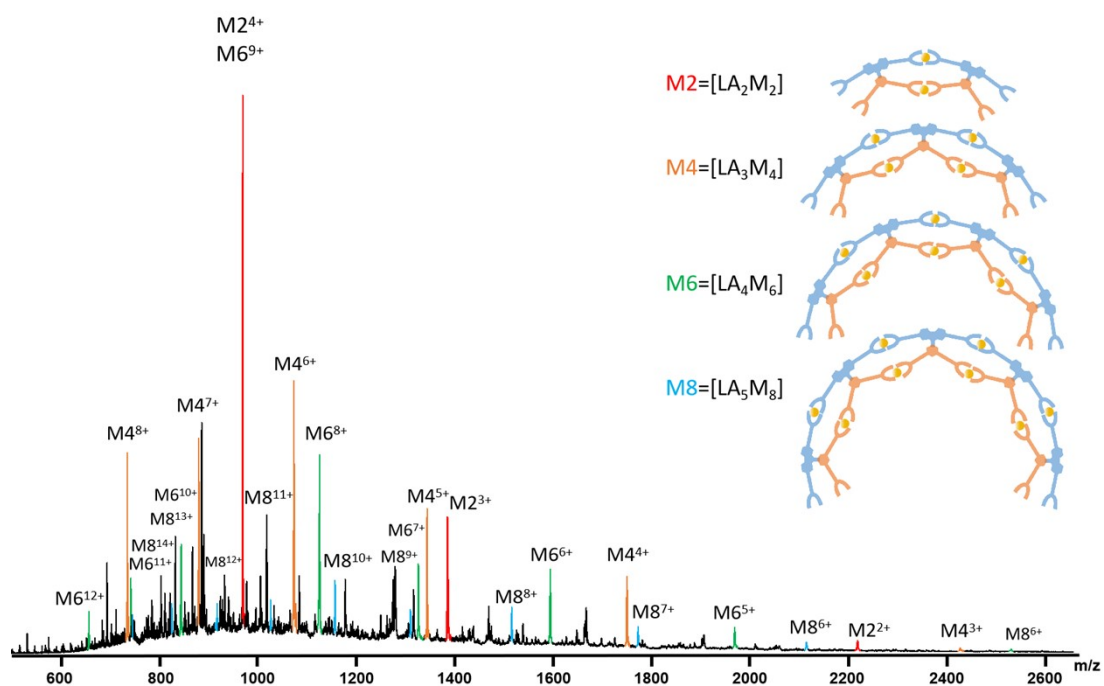

**Figure S52.** ESI-MS spectrum of the intermediates obtained by self-assembly of **LA** with Zn<sup>2+</sup> at a molar ratio of 1:1.5 (NTf<sub>2</sub><sup>-</sup> as counterion).

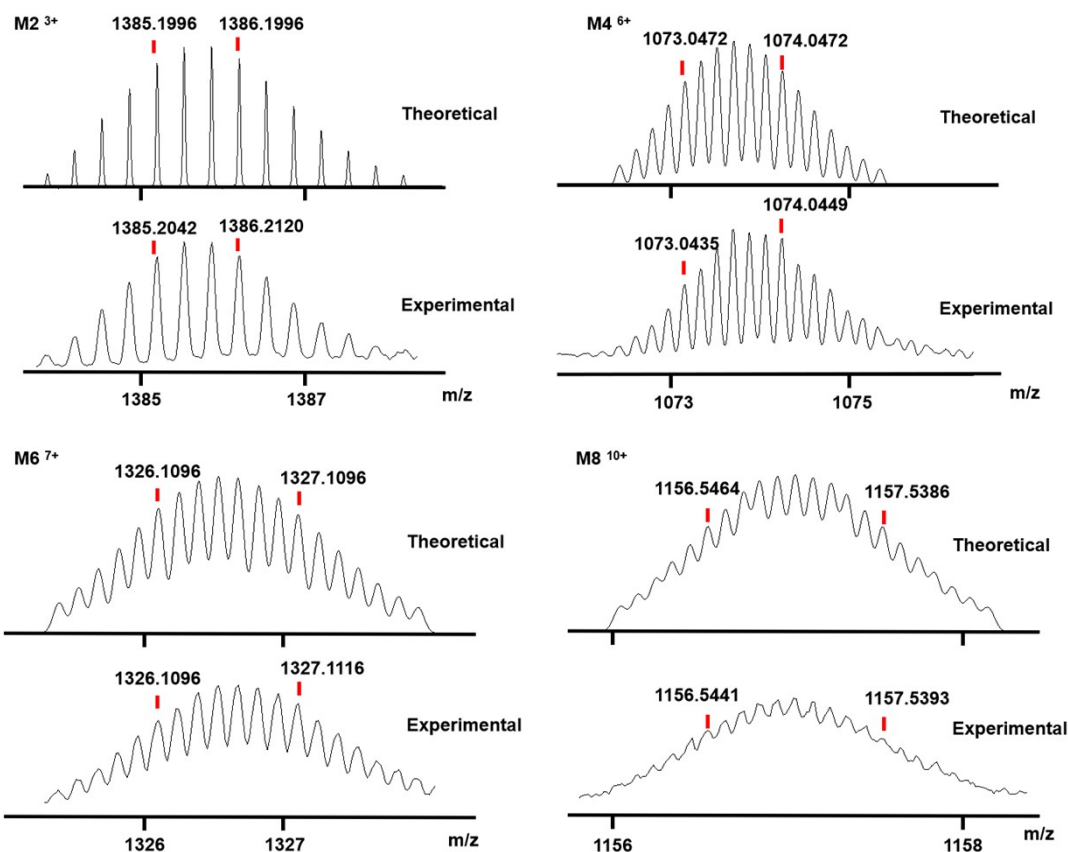

**Figure S53.** Theoretical (top) and experimental (bottom) isotope patterns for the different charge states observed from **MA** ( $\text{NTf}_2^-$  as counterion).

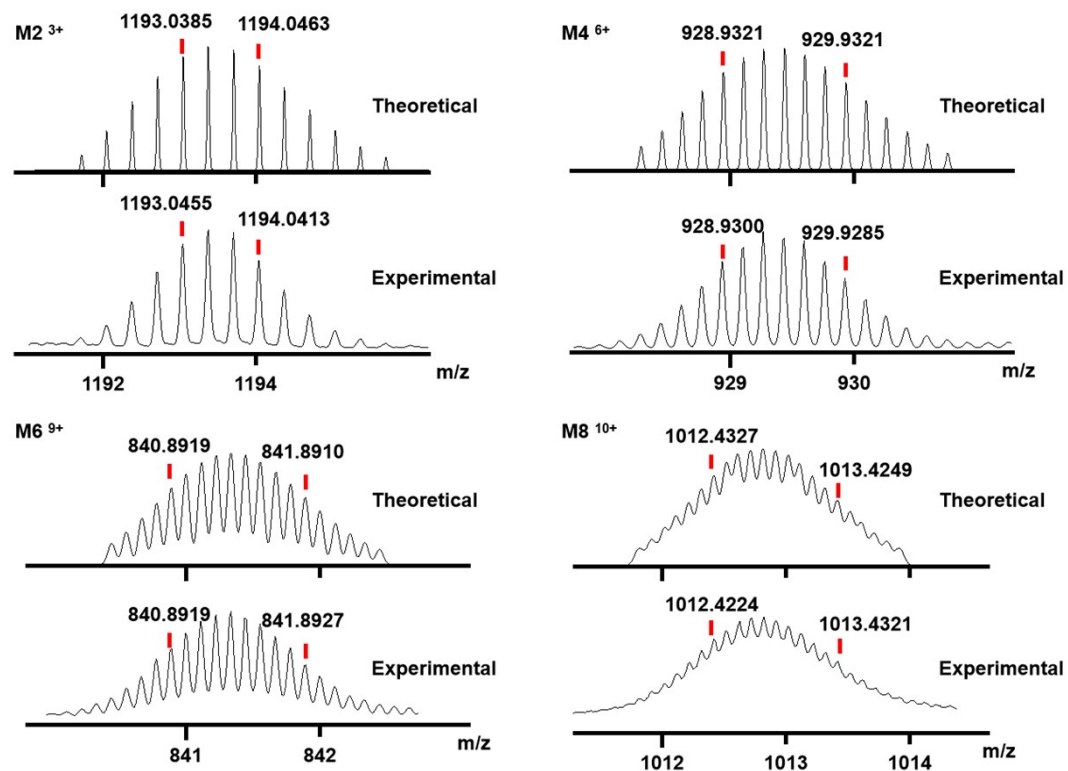

**Figure S54.** Theoretical (top) and experimental (bottom) isotope patterns for the different charge states observed from **MB** ( $\text{NTf}_2^-$  as counterion).



**Table S1.** Theoretical and experimental m/z ratios for [Zn<sub>16</sub>LA<sub>8</sub>].

| Charge state | Composition                            | Theoretical m/z | Experimental m/z |
|--------------|----------------------------------------|-----------------|------------------|
| 8+           | [M-8NTf <sub>2</sub> ] <sup>8+</sup>   | 2844.6400       | 2844.6199        |
| 9+           | [M-9NTf <sub>2</sub> ] <sup>9+</sup>   | 2497.4422       | 2794.2146        |
| 10+          | [M-10NTf <sub>2</sub> ] <sup>10+</sup> | 2219.6840       | 2219.6289        |
| 11+          | [M-11NTf <sub>2</sub> ] <sup>11+</sup> | 1992.4273       | 1992.3918        |
| 12+          | [M-12NTf <sub>2</sub> ] <sup>12+</sup> | 1803.0467       | 1803.1204        |
| 13+          | [M-13NTf <sub>2</sub> ] <sup>13+</sup> | 1642.8015       | 1642.8075        |
| 14+          | [M-14NTf <sub>2</sub> ] <sup>14+</sup> | 1505.4486       | 1505.4685        |
| 15+          | [M-15NTf <sub>2</sub> ] <sup>15+</sup> | 1386.4093       | 1386.4355        |
| 16+          | [M-16NTf <sub>2</sub> ] <sup>16+</sup> | 1282.2500       | 1282.2284        |
| 17+          | [M-17NTf <sub>2</sub> ] <sup>17+</sup> | 1190.3447       | 1190.3326        |
| 18+          | [M-18NTf <sub>2</sub> ] <sup>18+</sup> | 1108.6511       | 1108.6614        |
| 19+          | [M-19NTf <sub>2</sub> ] <sup>19+</sup> | 1035.5568       | 1035.5750        |
| 20+          | [M-20NTf <sub>2</sub> ] <sup>20+</sup> | 969.7720        | 969.6026         |
| 21+          | [M-21NTf <sub>2</sub> ] <sup>21+</sup> | 910.2524        | 910.3305         |
| 22+          | [M-22NTf <sub>2</sub> ] <sup>22+</sup> | 856.1436        | 856.1362         |

**Table S2.** Theoretical and experimental m/z ratios for [Zn<sub>18</sub>LA<sub>9</sub>].

| Charge state | Composition                            | Theoretical m/z | Experimental m/z |
|--------------|----------------------------------------|-----------------|------------------|
| 14+          | [M-14NTf <sub>2</sub> ] <sup>14+</sup> | 1728.6471       | 1728.7234        |
| 15+          | [M-15NTf <sub>2</sub> ] <sup>15+</sup> | 1594.7280       | 1594.6934        |
| 16+          | [M-16NTf <sub>2</sub> ] <sup>16+</sup> | 1477.5488       | 1477.4442        |
| 17+          | [M-17NTf <sub>2</sub> ] <sup>17+</sup> | 1374.1553       | 1374.1235        |
| 18+          | [M-18NTf <sub>2</sub> ] <sup>18+</sup> | 1282.2500       | 1282.2284        |
| 19+          | [M-19NTf <sub>2</sub> ] <sup>19+</sup> | 1200.0189       | 1200.0233        |
| 20+          | [M-20NTf <sub>2</sub> ] <sup>20+</sup> | 1126.0110       | 1125.9264        |
| 21+          | [M-21NTf <sub>2</sub> ] <sup>21+</sup> | 1059.0514       | 1059.0728        |
| 22+          | [M-22NTf <sub>2</sub> ] <sup>22+</sup> | 998.1791        | 998.1652         |
| 23+          | [M-23NTf <sub>2</sub> ] <sup>23+</sup> | 942.6000        | 942.4628         |
| 24+          | [M-24NTf <sub>2</sub> ] <sup>24+</sup> | 891.6525        | 891.6550         |
| 25+          | [M-25NTf <sub>2</sub> ] <sup>25+</sup> | 844.7808        | 844.7531         |

**Table S3.** Theoretical and experimental m/z ratios for [Zn<sub>20</sub>LA<sub>10</sub>].

| Charge state | Composition                            | Theoretical m/z | Experimental m/z |
|--------------|----------------------------------------|-----------------|------------------|
| 13+          | [M-13NTf <sub>2</sub> ] <sup>13+</sup> | 2123.5369       | 2123.5181        |

|     |                                        |           |           |
|-----|----------------------------------------|-----------|-----------|
| 14+ | [M-14NTf <sub>2</sub> ] <sup>14+</sup> | 1951.8457 | 1951.8488 |
| 15+ | [M-15NTf <sub>2</sub> ] <sup>15+</sup> | 1803.0467 | 1803.1204 |
| 16+ | [M-16NTf <sub>2</sub> ] <sup>16+</sup> | 1672.8475 | 1672.7977 |
| 17+ | [M-17NTf <sub>2</sub> ] <sup>17+</sup> | 1557.9659 | 1557.9265 |
| 18+ | [M-18NTf <sub>2</sub> ] <sup>18+</sup> | 1455.8489 | 1455.9407 |
| 19+ | [M-19NTf <sub>2</sub> ] <sup>19+</sup> | 1364.4811 | 1364.4136 |
| 20+ | [M-20NTf <sub>2</sub> ] <sup>20+</sup> | 1282.2500 | 1282.2284 |
| 21+ | [M-21NTf <sub>2</sub> ] <sup>21+</sup> | 1207.8505 | 1207.8102 |
| 22+ | [M-22NTf <sub>2</sub> ] <sup>22+</sup> | 1140.2145 | 1140.1382 |
| 23+ | [M-23NTf <sub>2</sub> ] <sup>23+</sup> | 1078.4600 | 1078.3562 |
| 24+ | [M-24NTf <sub>2</sub> ] <sup>24+</sup> | 1021.8517 | 1021.9628 |

**Table S7.** Theoretical and experimental m/z ratios for [Zn<sub>16</sub>LB<sub>8</sub>].

| Charge state | Composition                            | Theoretical m/z | Experimental m/z |
|--------------|----------------------------------------|-----------------|------------------|
| 10+          | [M-10NTf <sub>2</sub> ] <sup>10+</sup> | 1988.9400       | 1989.0968        |
| 11+          | [M-11NTf <sub>2</sub> ] <sup>11+</sup> | 1782.6600       | 1782.6381        |
| 12+          | [M-12NTf <sub>2</sub> ] <sup>12+</sup> | 1610.7600       | 1610.7992        |
| 13+          | [M-13NTf <sub>2</sub> ] <sup>13+</sup> | 1465.3062       | 1465.1810        |
| 14+          | [M-14NTf <sub>2</sub> ] <sup>14+</sup> | 1340.6314       | 1340.4917        |
| 15+          | [M-15NTf <sub>2</sub> ] <sup>15+</sup> | 1232.5800       | 1232.4807        |
| 16+          | [M-16NTf <sub>2</sub> ] <sup>16+</sup> | 1138.0350       | 1137.9879        |
| 17+          | [M-17NTf <sub>2</sub> ] <sup>17+</sup> | 1054.6129       | 1054.4823        |
| 18+          | [M-18NTf <sub>2</sub> ] <sup>18+</sup> | 980.4600        | 980.5468         |

**Table S8.** Theoretical and experimental m/z ratios for [Zn<sub>18</sub>LB<sub>9</sub>].

| Charge state | Composition                            | Theoretical m/z | Experimental m/z |
|--------------|----------------------------------------|-----------------|------------------|
| 11+          | [M-11NTf <sub>2</sub> ] <sup>11+</sup> | 2040.5100       | 2040.8651        |
| 12+          | [M-12NTf <sub>2</sub> ] <sup>12+</sup> | 1847.1225       | 1847.2660        |
| 13+          | [M-13NTf <sub>2</sub> ] <sup>13+</sup> | 1683.4869       | 1683.7830        |
| 14+          | [M-14NTf <sub>2</sub> ] <sup>14+</sup> | 1543.2279       | 1543.1353        |
| 15+          | [M-15NTf <sub>2</sub> ] <sup>15+</sup> | 1421.6700       | 1421.6132        |
| 16+          | [M-16NTf <sub>2</sub> ] <sup>16+</sup> | 1315.3069       | 1315.1100        |
| 17+          | [M-17NTf <sub>2</sub> ] <sup>17+</sup> | 1221.4571       | 1221.5123        |
| 18+          | [M-18NTf <sub>2</sub> ] <sup>18+</sup> | 1138.0350       | 1137.9879        |
| 19+          | [M-19NTf <sub>2</sub> ] <sup>19+</sup> | 1063.3942       | 1063.0372        |
| 20+          | [M-20NTf <sub>2</sub> ] <sup>20+</sup> | 996.2175        | 996.0065         |

**Table S9.** Theoretical and experimental m/z ratios for [Zn<sub>20</sub>LB<sub>10</sub>].

| Charge state | Composition                            | Theoretical m/z | Experimental m/z |
|--------------|----------------------------------------|-----------------|------------------|
| 12+          | [M-12NTf <sub>2</sub> ] <sup>12+</sup> | 2083.4850       | 2083.8386        |
| 13+          | [M-13NTf <sub>2</sub> ] <sup>13+</sup> | 1901.6677       | 1901.8301        |
| 14+          | [M-14NTf <sub>2</sub> ] <sup>14+</sup> | 1745.8243       | 1745.5701        |
| 15+          | [M-15NTf <sub>2</sub> ] <sup>15+</sup> | 1610.7600       | 1610.7992        |
| 16+          | [M-16NTf <sub>2</sub> ] <sup>16+</sup> | 1492.5788       | 1492.6056        |
| 17+          | [M-17NTf <sub>2</sub> ] <sup>17+</sup> | 1388.3012       | 1388.5630        |
| 18+          | [M-18NTf <sub>2</sub> ] <sup>18+</sup> | 1295.6100       | 1295.5450        |
| 19+          | [M-19NTf <sub>2</sub> ] <sup>19+</sup> | 1212.6758       | 1212.4930        |
| 20+          | [M-20NTf <sub>2</sub> ] <sup>20+</sup> | 1138.0350       | 1137.9879        |
| 21+          | [M-21NTf <sub>2</sub> ] <sup>21+</sup> | 1070.5029       | 1070.0546        |
| 22+          | [M-22NTf <sub>2</sub> ] <sup>22+</sup> | 1009.1100       | 1009.50          |

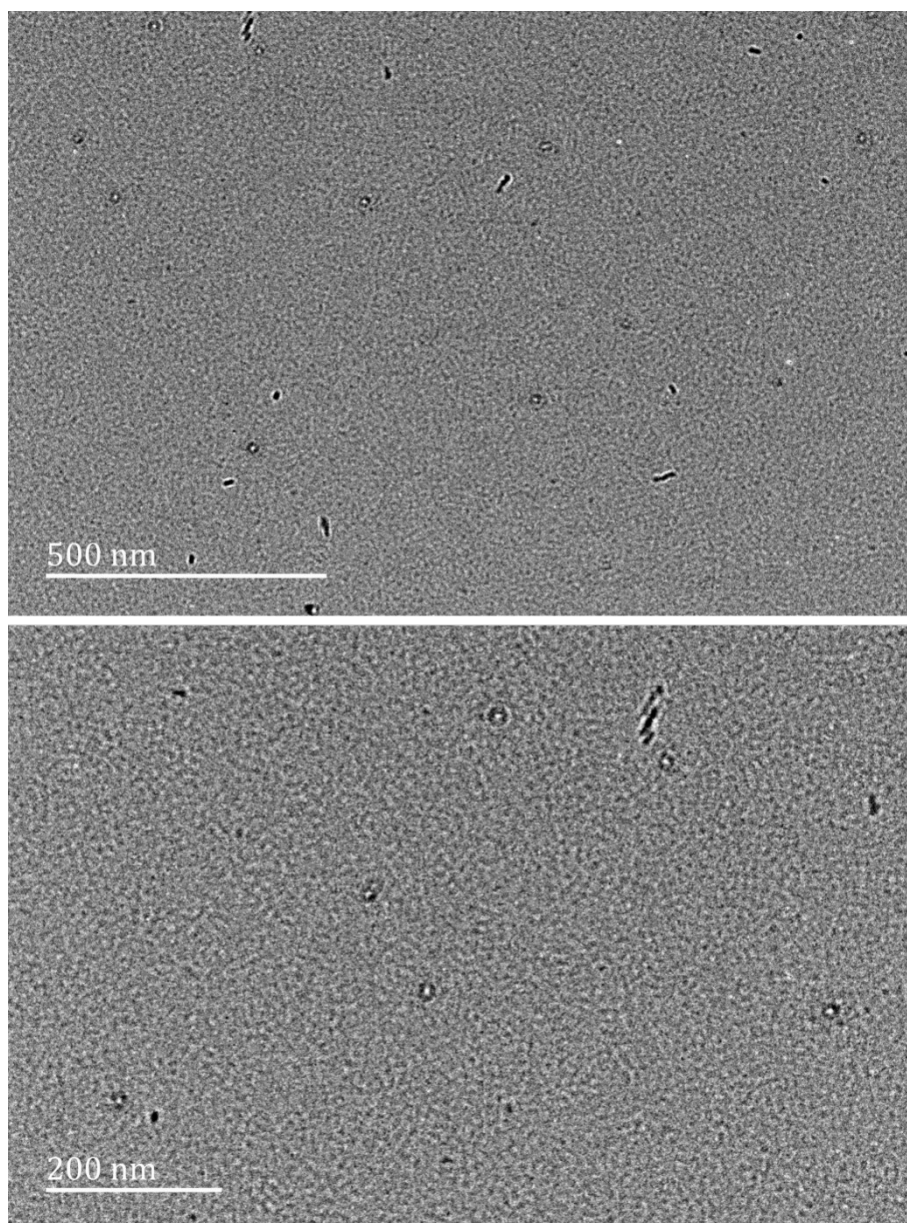

**Figure S55.** TEM images of supramolecular macrocycles SA. In the film, we observed the particles of complex SA with clear hollow structure.

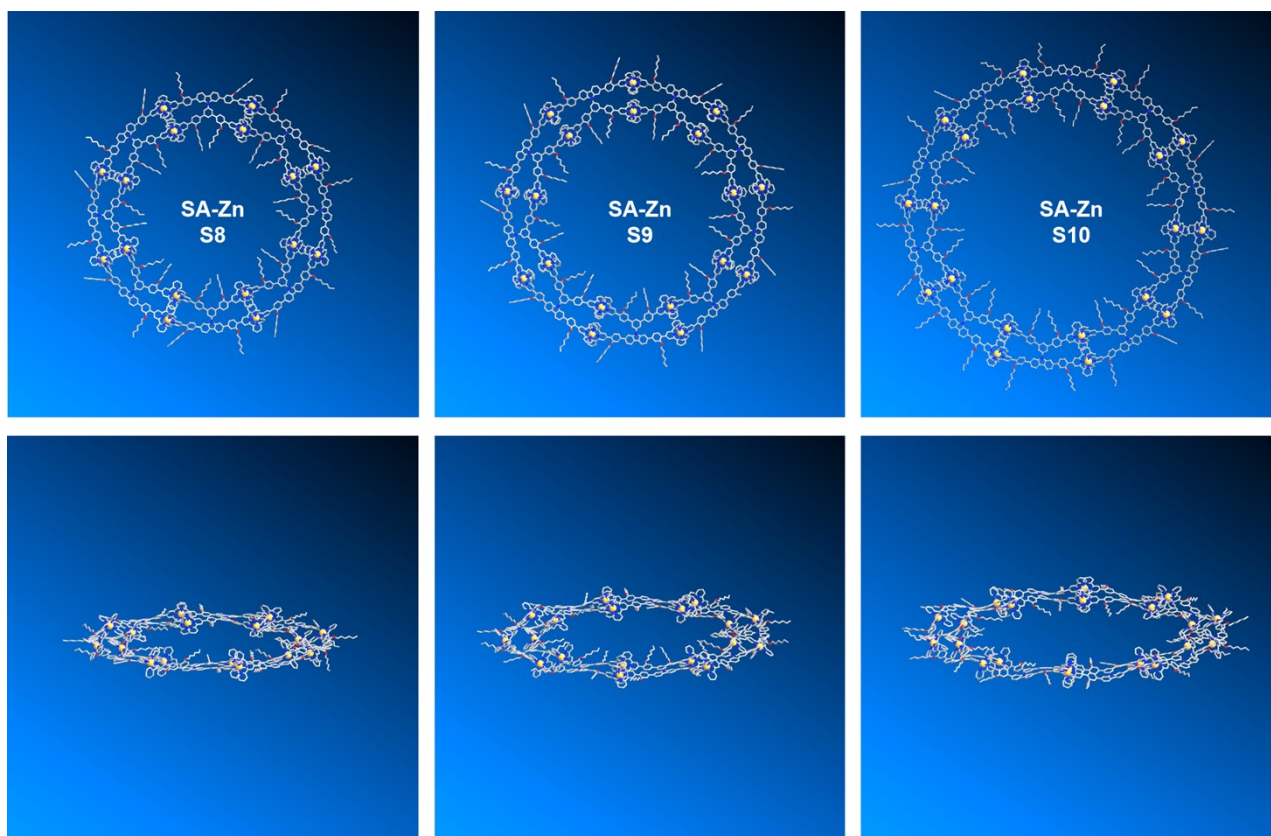

**Figure S56.** Representative energy-minimized structures from molecular modeling of **SA-Zn**.

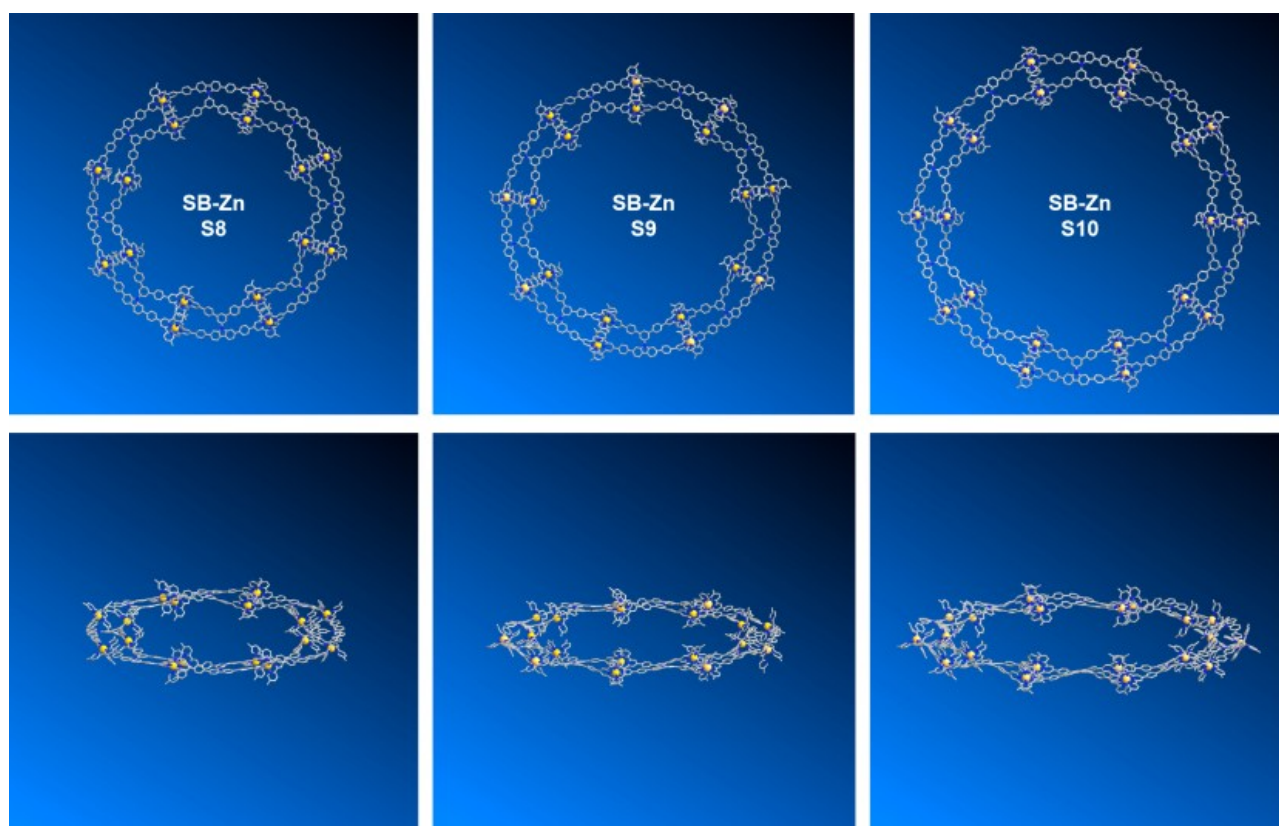

**Figure S57.** Representative energy-minimized structures from molecular modeling of **SB-Zn**.

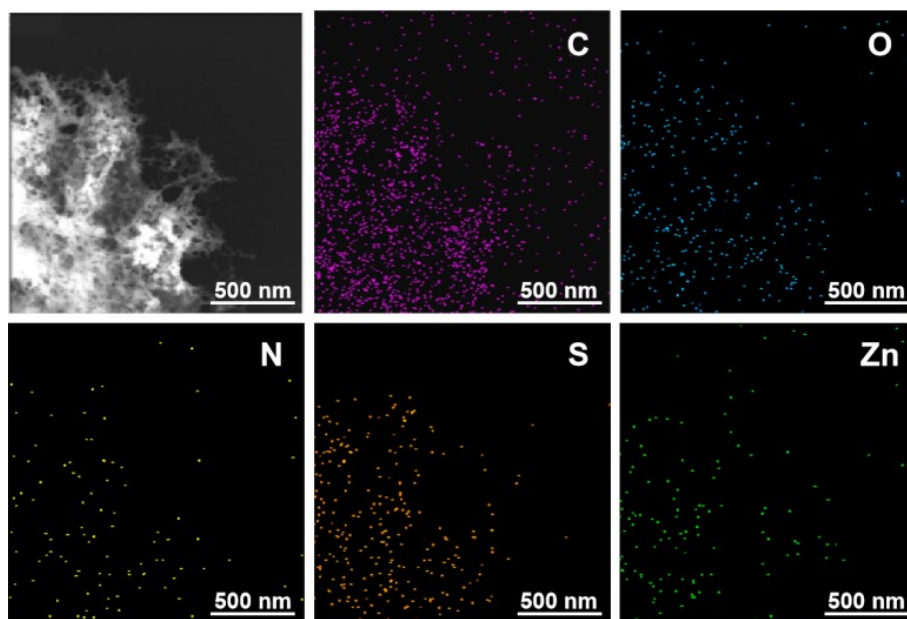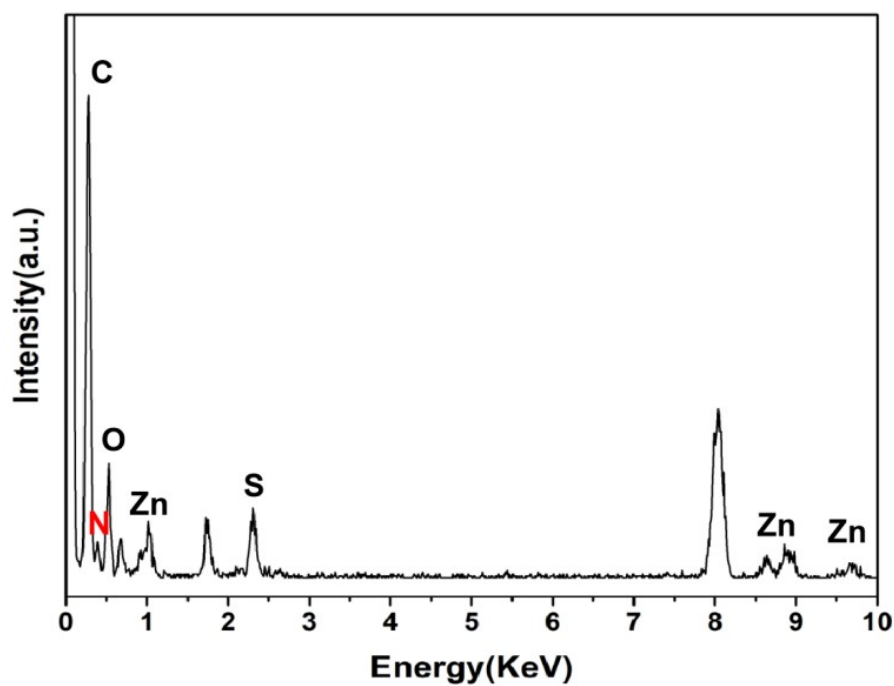

**Figure S58.** EDS elemental mapping and spectrum of the supramolecular macrocycles **SB** with heparin.

**Table S10.** Crystal data and structure refinement for compound **3** and ligand **LB**.

| Compound               | Compound <b>3</b>     | ligand <b>LB</b>                 |
|------------------------|-----------------------|----------------------------------|
| CCDC                   | 2242709               | 2245970                          |
| Formula                | $C_{64}H_{42}Br_2N_7$ | $C_{114.29}H_{90.18}N_{14.3}O_1$ |
| Temperature (K)        | 100(2)                | 120.00(10)                       |
| Formula weight (g/mol) | 1068.86               | 1692.62                          |
| Crystal system         | triclinic             | triclinic                        |
| Space group            | <i>P</i> -1           | <i>P</i> -1                      |

|                                                                           |                                |                                 |
|---------------------------------------------------------------------------|--------------------------------|---------------------------------|
| <i>a</i> (Å)                                                              | 11.3268(2)                     | 15.1349 (2)                     |
| <i>b</i> (Å)                                                              | 15.5229(3)                     | 24.4882 (3)                     |
| <i>c</i> (Å)                                                              | 17.3816(3)                     | 26.4272(3)                      |
| $\alpha$ (°)                                                              | 101.4560(16)                   | 66.8300(10)                     |
| $\beta$ (°)                                                               | 98.3563(16)                    | 87.7140(10)                     |
| $\gamma$ (°)                                                              | 107.5337(16)                   | 88.7170(10)                     |
| <i>V</i> (Å <sup>3</sup> )                                                | 2786.38(9)                     | 8997.2(2)                       |
| <i>Z</i>                                                                  | 2                              | 2                               |
| Calculated density                                                        |                                |                                 |
| (g cm <sup>-3</sup> )                                                     | 1.274                          | 1.250                           |
| $\mu$ (mm <sup>-1</sup> )                                                 | 1.500                          | 0.594                           |
| 2 $\theta$ (°)                                                            | 2.291 to 30.896                | 5.844 to 147.658                |
| F (000)                                                                   | 1096                           | 3562.0                          |
| Reflections collected                                                     | 10873                          | 130851                          |
| <i>R</i> <sub>int</sub>                                                   | 0.0710                         | 0.0469                          |
| Data/restraints/parameters                                                | 0/662                          | 35268/215/2602                  |
| Goodness-off-fit on F <sup>2</sup>                                        | 1.062                          | 1.222                           |
| Final <i>R</i> indices [ <i>I</i> > 2 $\sigma$ ( <i>I</i> )] <sup>a</sup> | <i>R</i> <sub>1</sub> =0.0659  | <i>R</i> <sub>1</sub> = 0.0967  |
|                                                                           | <i>wR</i> <sub>2</sub> =0.1199 | <i>wR</i> <sub>2</sub> = 0.2886 |
| <i>R</i> indices (all data)                                               | <i>R</i> <sub>1</sub> =0.0429  | <i>R</i> <sub>1</sub> = 0.1320  |
|                                                                           | <i>wR</i> <sub>2</sub> =0.1199 | <i>wR</i> <sub>2</sub> = 0.3252 |

$$^a R_1 = \frac{\sum ||F_o| - |F_c||}{\sum |F_o|}; wR_2 = \left[ \frac{\sum [w(F_o^2 - F_c^2)^2]}{\sum [w(F_o^2)]} \right]^{1/2}$$

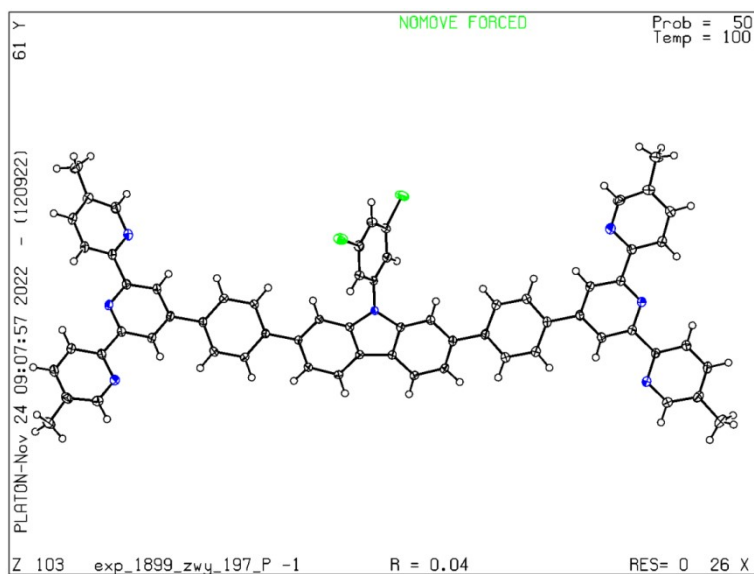

**Figure S59.** Ortep drawing of ligand **3**. The thermal ellipsoids are drawn at 50% probability.

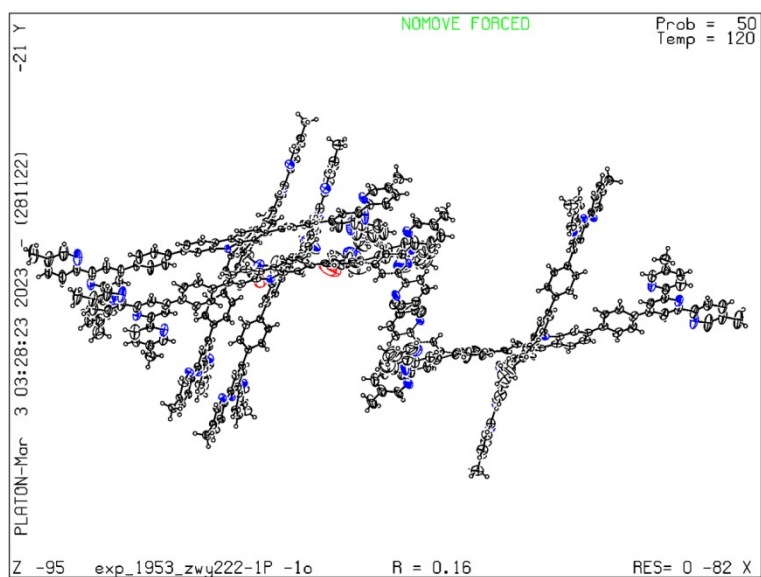

**Figure S60.** Ortep drawing of ligand **LB**. The thermal ellipsoids are drawn at 50% probability.

## 9. Reference

1. Dai, B., et al., *Site-Selective N-Arylation of Carbazoles with Halogenated Fluorobenzenes*. *Synthesis*, 2015. **48**(05): p. 737-750.
2. Wang, J., et al., *Construction of Macromolecular Pinwheels Using Predesigned Metalloligands*. *Journal of the American Chemical Society*, 2020. **142**(52): p. 21691-21701.
